# Supplementary material for: Intracerebral Hemorrhage and Ischemic Stroke of Different Etiologies Have Distinct Alternatively Spliced mRNA Profiles in the Blood: a Pilot RNA-seq Study
Source: PubMed Central journal article supplement (PMC4485700; doi:10.1007/s12975-015-0407-9), 2015-05-22
Supplement: 12975_2015_407_MOESM3_ESM.pdf [file 12975_2015_407_MOESM3_ESM.pdf]

**SUPPLEMENTARY TABLE 3. Genes (412) with Differential Alternative Splicing Among Large Vessel Ischemic Stroke (IS), Cardioembolic IS, Lacunar IS, Intracerebral Hemorrhage and Control Subjects**

| Gene Symbol       | Gene Name                                                                                                                               | alt-splicing (Dx) p-Value | FDR p-Value |
|-------------------|-----------------------------------------------------------------------------------------------------------------------------------------|---------------------------|-------------|
| MARCH7            | membrane-associated ring finger (C3HC4) 7                                                                                               | 1.18E-05                  | 9.07E-04    |
| SEPT15            | septin 5                                                                                                                                | 3.38E-05                  | 2.16E-03    |
| ABCA7             | ATP-binding cassette, sub-family A (ABC1), member 7                                                                                     | 3.37E-08                  | 7.73E-06    |
| ACSL4/KCNE1L      | acyl-CoA synthetase long-chain family member 4/KCNE1-like                                                                               | 6.77E-05                  | 3.66E-03    |
| ACTR2             | ARP2 actin-related protein 2 homolog (yeast)                                                                                            | 5.76E-20                  | 2.57E-16    |
| ACTR3             | ARP3 actin-related protein 3 homolog (yeast)                                                                                            | 1.29E-03                  | 3.34E-02    |
| ADCK2/NDUFB2      | aarF domain containing kinase 2/NADH dehydrogenase (ubiquinone) 1 beta subcomplex, 2, 8kDa                                              | 6.16E-05                  | 3.42E-03    |
| ADCY7             | adenylate cyclase 7                                                                                                                     | 6.29E-09                  | 1.76E-06    |
| ADD3              | adducin 3 (gamma)                                                                                                                       | 1.14E-05                  | 8.90E-04    |
| ADSS/TGIF2P1      | adenylosuccinate synthase/TGFB-induced factor homeobox 2 pseudogene 1                                                                   | 4.63E-05                  | 2.67E-03    |
| AKAP8             | A kinase (PRKA) anchor protein 8                                                                                                        | 1.29E-03                  | 3.34E-02    |
| ANAPC13           | anaphase promoting complex subunit 13                                                                                                   | 1.50E-03                  | 3.70E-02    |
| ANKRD12           | ankyrin repeat domain 12                                                                                                                | 3.96E-06                  | 3.97E-04    |
| ANKRD13A          | ankyrin repeat domain 13A                                                                                                               | 7.49E-05                  | 3.95E-03    |
| ANXA1             | annexin A1                                                                                                                              | 8.66E-08                  | 1.65E-05    |
| ANXA7             | annexin A7                                                                                                                              | 8.70E-06                  | 7.20E-04    |
| AP1S2             | adaptor-related protein complex 1, sigma 2 subunit pseudogene; adaptor-related protein complex 1, sigma 2 subunit                       | 1.11E-03                  | 2.93E-02    |
| APAF1             | apoptotic peptidase activating factor 1                                                                                                 | 1.80E-03                  | 4.20E-02    |
| APH1A             | anterior pharynx defective 1 homolog A (C. elegans)                                                                                     | 1.32E-03                  | 3.40E-02    |
| APIP              | APAF1 interacting protein; similar to APAF1 interacting protein                                                                         | 1.35E-03                  | 3.45E-02    |
| APOBEC3A/APOBEC3B | apolipoprotein B mRNA editing enzyme, catalytic polypeptide-like 3A/apolipoprotein B mRNA editing enzyme, catalytic polypeptide-like 3B | 5.87E-04                  | 1.81E-02    |
| ARCN1             | archain 1                                                                                                                               | 2.53E-04                  | 9.85E-03    |
| ARFIP1/FHDC1      | ADP-ribosylation factor interacting protein 1/FH2 domain containing 1                                                                   | 1.69E-05                  | 1.24E-03    |

|                               |                                                                                                                                                         |          |          |
|-------------------------------|---------------------------------------------------------------------------------------------------------------------------------------------------------|----------|----------|
| ARID4B/RBM34                  | AT rich interactive domain 4B (RBP1-like)/RNA binding motif protein 34                                                                                  | 4.36E-05 | 2.56E-03 |
| ARL6IP5                       | ADP-ribosylation-like factor 6 interacting protein 5                                                                                                    | 2.89E-05 | 1.91E-03 |
| ARNTL                         | aryl hydrocarbon receptor nuclear translocator-like                                                                                                     | 1.83E-05 | 1.32E-03 |
| ARPC3/ANAPC7                  | actin related protein 2/3 complex, subunit 3, 21kDa/anaphase promoting complex subunit 7                                                                | 5.80E-11 | 3.45E-08 |
| ARPC4/TLL3                    | actin related protein 2/3 complex, subunit 4, 20kDa/tubulin tyrosine ligase-like family member 3                                                        | 3.14E-11 | 2.16E-08 |
| ARPC5L                        | actin related protein 2/3 complex, subunit 5-like                                                                                                       | 2.44E-04 | 9.56E-03 |
| ATM                           | similar to Serine-protein kinase ATM (Ataxia telangiectasia mutated) (A-T, mutated); ataxia telangiectasia mutated                                      | 6.24E-05 | 3.42E-03 |
| ATP2B4                        | ATPase, Ca <sup>++</sup> transporting, plasma membrane 4                                                                                                | 2.42E-04 | 9.54E-03 |
| ATP5B/SNORD59A/SNORD59B       | ATP synthase, H <sup>+</sup> transporting, mitochondrial F1 complex, beta polypeptide/small nucleolar RNA, C/D box 59A/small nucleolar RNA, C/D box 59B | 3.76E-10 | 1.46E-07 |
| ATP6V1G2/BAT1(DDX39B)/SNORD84 | ATPase, H <sup>+</sup> transporting, lysosomal 13kDa, V1 subunit G2/DEAD (Asp-Glu-Ala-Asp) box polypeptide 39B/<br>small nucleolar RNA, C/D box 84      | 2.39E-06 | 2.51E-04 |
| ATXN1L/KIAA0174(IST1)         | ataxin 1-like/increased sodium tolerance 1 homolog (yeast)                                                                                              | 8.77E-05 | 4.38E-03 |
| AZIN1                         | antizyme inhibitor 1                                                                                                                                    | 8.54E-04 | 2.38E-02 |
| baboy                         |                                                                                                                                                         | 5.62E-04 | 1.76E-02 |
| BAZ1A                         | bromodomain adjacent to zinc finger domain, 1A                                                                                                          | 7.63E-04 | 2.21E-02 |
| BAZ2B                         | bromodomain adjacent to zinc finger domain, 2B                                                                                                          | 4.42E-04 | 1.49E-02 |
| BTN2A2/BTN3A1                 | butyrophilin, subfamily 2, member A2/butyrophilin, subfamily 3, member A1                                                                               | 3.13E-06 | 3.21E-04 |
| C11orf73                      | chromosome 11 open reading frame 73                                                                                                                     | 1.71E-03 | 4.08E-02 |
| C15orf29                      | chromosome 15 open reading frame 29                                                                                                                     | 5.37E-08 | 1.17E-05 |
| C1orf59                       | chromosome 1 open reading frame 59                                                                                                                      | 5.42E-05 | 3.03E-03 |
| C1orf63                       | chromosome 1 open reading frame 63                                                                                                                      | 1.10E-12 | 1.40E-09 |
| C5orf15                       | chromosome 5 open reading frame 15                                                                                                                      | 5.26E-04 | 1.67E-02 |
| C6orf62                       | chromosome 6 open reading frame 62                                                                                                                      | 1.51E-04 | 6.62E-03 |
| C7orf27                       | chromosome 7 open reading frame 27                                                                                                                      | 7.25E-04 | 2.11E-02 |
| C9orf114                      | chromosome 9 open reading frame 114                                                                                                                     | 2.31E-04 | 9.15E-03 |
| C9orf72                       | chromosome 9 open reading frame 72                                                                                                                      | 5.43E-04 | 1.71E-02 |
| CAB39                         | calcium binding protein 39                                                                                                                              | 9.34E-05 | 4.56E-03 |

|                |                                                                                                                                    |          |          |
|----------------|------------------------------------------------------------------------------------------------------------------------------------|----------|----------|
| CALM1          | calmodulin 3 (phosphorylase kinase, delta); calmodulin 2 (phosphorylase kinase, delta); calmodulin 1 (phosphorylase kinase, delta) | 2.24E-07 | 3.77E-05 |
| CALM2/C2orf61  | calmodulin 2 (phosphorylase kinase, delta)/chromosome 2 open reading frame 61                                                      | 3.70E-12 | 3.00E-09 |
| CAPZA2         | capping protein (actin filament) muscle Z-line, alpha 2                                                                            | 6.35E-04 | 1.91E-02 |
| CARD8          | caspase recruitment domain family, member 8                                                                                        | 5.51E-08 | 1.17E-05 |
| CBARA1         | calcium binding atopy-related autoantigen 1                                                                                        | 2.87E-04 | 1.08E-02 |
| CCAR1          | cell division cycle and apoptosis regulator 1                                                                                      | 1.61E-05 | 1.19E-03 |
| CCNDBP1        | cyclin D-type binding-protein 1                                                                                                    | 3.17E-10 | 1.29E-07 |
| CCNY           | cyclin Y                                                                                                                           | 1.68E-04 | 7.13E-03 |
| CCT8           | similar to chaperonin containing TCP1, subunit 8 (theta); chaperonin containing TCP1, subunit 8 (theta)                            | 2.19E-03 | 4.80E-02 |
| CD164          | CD164 molecule, sialomucin                                                                                                         | 1.82E-05 | 1.32E-03 |
| CD244          | CD244 molecule, natural killer cell receptor 2B4                                                                                   | 6.82E-04 | 2.03E-02 |
| CD300E         | CD300e molecule                                                                                                                    | 1.05E-04 | 4.97E-03 |
| CD36           | CD36 molecule (thrombospondin receptor)                                                                                            | 2.83E-07 | 4.60E-05 |
| CD46           | CD46 molecule, complement regulatory protein                                                                                       | 4.46E-06 | 4.29E-04 |
| CD47           | CD47 molecule                                                                                                                      | 4.97E-15 | 9.66E-12 |
| CD53           | CD53 molecule                                                                                                                      | 1.52E-04 | 6.62E-03 |
| CD58           | CD58 molecule                                                                                                                      | 2.07E-04 | 8.41E-03 |
| CD74           | CD74 molecule, major histocompatibility complex, class II invariant chain                                                          | 6.89E-04 | 2.03E-02 |
| CD86           | CD86 molecule                                                                                                                      | 1.60E-03 | 3.88E-02 |
| CDC42SE1       | CDC42 small effector 1                                                                                                             | 1.70E-06 | 1.97E-04 |
| CDC42SE2       | CDC42 small effector 2                                                                                                             | 3.58E-04 | 1.26E-02 |
| CDKL3/PPP2CA   | cyclin-dependent kinase-like 3/protein phosphatase 2, catalytic subunit, alpha isozyme                                             | 3.66E-05 | 2.26E-03 |
| CDKN1C         | cyclin-dependent kinase inhibitor 1C (p57, Kip2)                                                                                   | 2.33E-05 | 1.59E-03 |
| CECR1          | cat eye syndrome chromosome region, candidate 1                                                                                    | 6.88E-06 | 5.97E-04 |
| CELF2          | CUG triplet repeat, RNA binding protein 2                                                                                          | 3.17E-04 | 1.14E-02 |
| CFLAR/RNU7-45P | CASP8 and FADD-like apoptosis regulator/RNA, U7 small nuclear 45 pseudogene                                                        | 1.42E-08 | 3.64E-06 |
| CGGBP1         | CGG triplet repeat binding protein 1                                                                                               | 7.87E-05 | 4.06E-03 |
| CHMP2B         | chromatin modifying protein 2B                                                                                                     | 1.42E-03 | 3.57E-02 |
| CLDND1         | claudin domain containing 1                                                                                                        | 2.13E-06 | 2.32E-04 |
| CLEC7A         | C-type lectin domain family 7, member A                                                                                            | 8.25E-10 | 3.02E-07 |

|               |                                                                                                                             |          |          |
|---------------|-----------------------------------------------------------------------------------------------------------------------------|----------|----------|
| CLTC          | clathrin, heavy chain (Hc)                                                                                                  | 2.74E-04 | 1.04E-02 |
| CNIH          | cornichon homolog (Drosophila)                                                                                              | 1.84E-04 | 7.55E-03 |
| CNOT6L        | CCR4-NOT transcription complex, subunit 6-like                                                                              | 6.04E-04 | 1.85E-02 |
| CNOT7         | CCR4-NOT transcription complex, subunit 7                                                                                   | 2.15E-03 | 4.75E-02 |
| CNOT8         | CCR4-NOT transcription complex, subunit 8                                                                                   | 3.00E-04 | 1.10E-02 |
| COMMD2        | canopy 2 homolog (zebrafish)                                                                                                | 1.41E-03 | 3.55E-02 |
| CRKL          | COMM domain containing 2                                                                                                    | 1.14E-03 | 3.00E-02 |
| CSGALNACT2    | chondroitin sulfate N-acetylgalactosaminyltransferase 2; novel protein similar to chondroitin sulfate GalNAcT-2 (GALNACT-2) | 3.60E-05 | 2.26E-03 |
| CTDSP2        | similar to hCG2013701; CTD (carboxy-terminal domain, RNA polymerase II, polypeptide A) small phosphatase 2                  | 5.61E-04 | 1.76E-02 |
| CTSS          | cathepsin S                                                                                                                 | 1.46E-06 | 1.76E-04 |
| CYBB          | cytochrome b-245, beta polypeptide                                                                                          | 7.15E-09 | 1.94E-06 |
| CYBRD1        | cytochrome b reductase 1                                                                                                    | 2.31E-05 | 1.59E-03 |
| CYLD          | cylindromatosis (turban tumor syndrome)                                                                                     | 1.37E-03 | 3.47E-02 |
| DAP3          | death associated protein 3                                                                                                  | 2.13E-03 | 4.74E-02 |
| DCP2          | DCP2 decapping enzyme homolog (S. cerevisiae)                                                                               | 3.88E-07 | 5.69E-05 |
| DDX19B/DDX19A | DEAD (Asp-Glu-Ala-Asp) box polypeptide 19B/DEAD (Asp-Glu-Ala-Asp) box polypeptide 19A                                       | 3.10E-04 | 1.13E-02 |
| DDX3X         | DEAD (Asp-Glu-Ala-Asp) box polypeptide 3, X-linked                                                                          | 1.37E-12 | 1.53E-09 |
| DDX60L        | DEAD (Asp-Glu-Ala-Asp) box polypeptide 60-like                                                                              | 4.35E-06 | 4.27E-04 |
| DEGS1         | degenerative spermatocyte homolog 1, lipid desaturase (Drosophila)                                                          | 1.25E-04 | 5.67E-03 |
| DENND5A       | DENN/MADD domain containing 5A                                                                                              | 3.64E-07 | 5.45E-05 |
| DHX40         | similar to DEAH (Asp-Glu-Ala-His) box polypeptide 40; DEAH (Asp-Glu-Ala-His) box polypeptide 40                             | 7.11E-04 | 2.08E-02 |
| DMXL2         | Dmx-like 2                                                                                                                  | 7.29E-12 | 5.43E-09 |
| DNAJB6        | DnaJ (Hsp40) homolog, subfamily B, member 6                                                                                 | 1.20E-04 | 5.52E-03 |
| DNTTIP1       | deoxynucleotidyltransferase, terminal, interacting protein 1                                                                | 1.88E-03 | 4.29E-02 |
| DPEP2/DPEP3   | dipeptidase 2/dipeptidase 3                                                                                                 | 5.43E-05 | 3.03E-03 |
| DPY30/MEMO1   | dpy-30 homolog (C. elegans)/mediator of cell motility 1                                                                     | 2.26E-03 | 4.91E-02 |
| DPYD          | dihydropyrimidine dehydrogenase                                                                                             | 8.13E-08 | 1.61E-05 |
| DTX3L         | deltex 3-like (Drosophila)                                                                                                  | 3.95E-04 | 1.37E-02 |

|                 |                                                                                                                                                                                                     |          |          |
|-----------------|-----------------------------------------------------------------------------------------------------------------------------------------------------------------------------------------------------|----------|----------|
| DUSP22          | similar to mitogen-activated protein kinase phosphatase x; dual specificity phosphatase 22                                                                                                          | 7.74E-04 | 2.21E-02 |
| DYNC1LI1        | dynein, cytoplasmic 1, light intermediate chain 1                                                                                                                                                   | 7.00E-04 | 2.06E-02 |
| DYNC1LI2        | dynein, cytoplasmic 1, light intermediate chain 2                                                                                                                                                   | 3.68E-05 | 2.26E-03 |
| DYX1C1/CCPG1    | dyslexia susceptibility 1 candidate 1/cell cycle progression 1                                                                                                                                      | 7.61E-05 | 3.95E-03 |
| EAPP            | E2F-associated phosphoprotein                                                                                                                                                                       | 5.17E-04 | 1.67E-02 |
| ECHDC1          | enoyl Coenzyme A hydratase domain containing 1                                                                                                                                                      | 7.45E-06 | 6.34E-04 |
| ECHDC2          | enoyl Coenzyme A hydratase domain containing 2                                                                                                                                                      | 9.29E-04 | 2.55E-02 |
| EGLN1           | egl nine homolog 1 (C. elegans)                                                                                                                                                                     | 2.12E-04 | 8.51E-03 |
| EIF2AK2         | eukaryotic translation initiation factor 2-alpha kinase 2                                                                                                                                           | 1.63E-03 | 3.91E-02 |
| EIF2S1          | eukaryotic translation initiation factor 2, subunit 1 alpha, 35kDa                                                                                                                                  | 4.13E-04 | 1.42E-02 |
| ELP2            | elongation protein 2 homolog (S. cerevisiae)                                                                                                                                                        | 1.01E-05 | 8.06E-04 |
| EMB             | embigin homolog (mouse)                                                                                                                                                                             | 1.03E-10 | 5.41E-08 |
| EPHB4           | EPH receptor B4                                                                                                                                                                                     | 1.48E-03 | 3.67E-02 |
| ERAP1           | endoplasmic reticulum aminopeptidase 1                                                                                                                                                              | 8.18E-05 | 4.13E-03 |
| ERBB2IP         | erbb2 interacting protein                                                                                                                                                                           | 6.97E-05 | 3.73E-03 |
| ERN1            | endoplasmic reticulum to nucleus signaling 1                                                                                                                                                        | 1.70E-03 | 4.07E-02 |
| ETNK1           | ethanolamine kinase 1                                                                                                                                                                               | 1.83E-03 | 4.23E-02 |
| FAM111B/FAM111A | family with sequence similarity 111, member B/family with sequence similarity 111, member A                                                                                                         | 1.78E-03 | 4.16E-02 |
| FAM118A         | family with sequence similarity 118, member A                                                                                                                                                       | 9.23E-10 | 3.13E-07 |
| FAM198B         | chromosome 4 open reading frame 18                                                                                                                                                                  | 2.90E-04 | 1.08E-02 |
| FAM45A          | family with sequence similarity 45, member A                                                                                                                                                        | 2.11E-04 | 8.51E-03 |
| FBXL3           | F-box and leucine-rich repeat protein 3                                                                                                                                                             | 2.01E-04 | 8.22E-03 |
| FBXL5           | F-box and leucine-rich repeat protein 5                                                                                                                                                             | 1.40E-06 | 1.71E-04 |
| FCER1A          | Fc fragment of IgE, high affinity I, receptor for; alpha polypeptide                                                                                                                                | 6.21E-07 | 8.53E-05 |
| FKBP1A/SDCBP2   | FK506 binding protein 1A, 12kDa/syndecan binding protein (syntenin) 2                                                                                                                               | 1.09E-03 | 2.89E-02 |
| FNTA            | farnesyltransferase, CAAX box, alpha                                                                                                                                                                | 2.84E-08 | 6.86E-06 |
| GALNT1          | UDP-N-acetyl-alpha-D-galactosamine:polypeptide N-acetylgalactosaminyltransferase 13 (GalNAc-T13);<br>UDP-N-acetyl-alpha-D-galactosamine:polypeptide N-acetylgalactosaminyltransferase 1 (GalNAc-T1) | 3.80E-09 | 1.13E-06 |

|                 |                                                                                                                                                                                   |          |          |
|-----------------|-----------------------------------------------------------------------------------------------------------------------------------------------------------------------------------|----------|----------|
| GBP4/GBP7/GBP2  | guanylate binding protein 4/guanylate binding protein 7/guanylate binding protein 2, interferon-inducible                                                                         | 3.67E-05 | 2.26E-03 |
| GCA             | grancalcin, EF-hand calcium binding protein                                                                                                                                       | 2.92E-07 | 4.66E-05 |
| GGNBP2          | gametogenetin binding protein 2                                                                                                                                                   | 1.12E-04 | 5.26E-03 |
| GHITM           | growth hormone inducible transmembrane protein                                                                                                                                    | 9.44E-07 | 1.22E-04 |
| GIT2            | G protein-coupled receptor kinase interacting ArfGAP 2                                                                                                                            | 5.73E-04 | 1.78E-02 |
| GLRX            | glutaredoxin (thioltransferase)                                                                                                                                                   | 5.22E-04 | 1.67E-02 |
| GLUD1           | glutamate dehydrogenase 1                                                                                                                                                         | 4.22E-05 | 2.52E-03 |
| GMCL1           | germ cell-less homolog 1 (Drosophila)-like; germ cell-less homolog 1 (Drosophila)                                                                                                 | 4.91E-04 | 1.62E-02 |
| GPX1            | glutathione peroxidase 1                                                                                                                                                          | 1.77E-03 | 4.15E-02 |
| GSTK1           | glutathione S-transferase kappa 1                                                                                                                                                 | 1.77E-04 | 7.34E-03 |
| GSTO1           | glutathione S-transferase omega 1                                                                                                                                                 | 4.25E-04 | 1.44E-02 |
| GTF2I           | general transcription factor II, i; general transcription factor II, i, pseudogene                                                                                                | 1.39E-05 | 1.04E-03 |
| GZMA            | granzyme A (granzyme 1, cytotoxic T-lymphocyte-associated serine esterase 3)                                                                                                      | 1.27E-03 | 3.31E-02 |
| H2AFZ           | H2A histone family, member Z                                                                                                                                                      | 8.03E-04 | 2.26E-02 |
| H3F3B           | H3 histone, family 3B (H3.3B); H3 histone, family 3A pseudogene; H3 histone, family 3A; similar to H3 histone, family 3B; similar to histone H3.3B                                | 1.90E-03 | 4.32E-02 |
| HBP1            | HMG-box transcription factor 1                                                                                                                                                    | 7.69E-04 | 2.21E-02 |
| HDC             | histidine decarboxylase                                                                                                                                                           | 1.26E-03 | 3.28E-02 |
| HERC3           | hect domain and RLD 3                                                                                                                                                             | 4.70E-07 | 6.67E-05 |
| HERC5           | hect domain and RLD 5                                                                                                                                                             | 1.03E-05 | 8.14E-04 |
| hetira          |                                                                                                                                                                                   | 7.84E-04 | 2.22E-02 |
| HEXB            | hexosaminidase B (beta polypeptide)                                                                                                                                               | 3.00E-04 | 1.10E-02 |
| HIPK3           | homeodomain interacting protein kinase 3                                                                                                                                          | 2.01E-10 | 9.45E-08 |
| HLA-DMA/HLA-DMB | major histocompatibility complex, class II, DM alpha/major histocompatibility complex, class II, DM beta                                                                          | 5.32E-05 | 3.01E-03 |
| HLA-DQA1        | similar to hCG2042724; similar to HLA class II histocompatibility antigen, DQ(1) alpha chain precursor (DC-4 alpha chain); major histocompatibility complex, class II, DQ alpha 1 | 1.89E-03 | 4.31E-02 |
| HLA-DRB1        | major histocompatibility complex, class II, DR beta 4; major histocompatibility complex, class II, DR beta 1                                                                      | 2.35E-06 | 2.49E-04 |
| HMGB1           | high-mobility group box 1; high-mobility group box 1-like 10                                                                                                                      | 1.45E-03 | 3.64E-02 |

|                           |                                                                                          |          |          |
|---------------------------|------------------------------------------------------------------------------------------|----------|----------|
| HMGCL/GALE                | 3-hydroxymethyl-3-methylglutaryl-CoA lyase/UDP-galactose-4-epimerase                     | 1.02E-03 | 2.73E-02 |
| HMGN4                     | high mobility group nucleosomal binding domain 4                                         | 7.64E-06 | 6.44E-04 |
| HNRNPA2B1                 | heterogeneous nuclear ribonucleoprotein A2/B1                                            | 5.52E-06 | 4.93E-04 |
| HNRNPAB                   | heterogeneous nuclear ribonucleoprotein A/B                                              | 3.04E-04 | 1.11E-02 |
| HNRNPH3                   | heterogeneous nuclear ribonucleoprotein H3 (2H9)                                         | 2.16E-06 | 2.32E-04 |
| HP1BP3                    | heterochromatin protein 1, binding protein 3                                             | 1.62E-03 | 3.90E-02 |
| HSD17B11/HSD17B13         | hydroxysteroid (17-beta) dehydrogenase 11/hydroxysteroid (17-beta) dehydrogenase 13      | 6.11E-04 | 1.86E-02 |
| HSD17B4/FAM170A           | hydroxysteroid (17-beta) dehydrogenase 4/family with sequence similarity 170, member A   | 2.19E-05 | 1.52E-03 |
| HSPC157 (LINC00339)/CDC42 | long intergenic non-protein coding RNA 339 /cell division cycle 42                       | 1.01E-03 | 2.72E-02 |
| IDH1                      | isocitrate dehydrogenase 1 (NADP+), soluble                                              | 7.39E-06 | 6.34E-04 |
| IFIH1                     | interferon induced with helicase C domain 1                                              | 5.00E-04 | 1.65E-02 |
| IFNAR1                    | interferon (alpha, beta and omega) receptor 1                                            | 3.13E-04 | 1.13E-02 |
| IFNGR1                    | interferon gamma receptor 1                                                              | 3.75E-11 | 2.39E-08 |
| IFRD1/C7orf53 (LSMEM1 )   | interferon-related developmental regulator 1/leucine-rich single-pass membrane protein 1 | 8.87E-04 | 2.44E-02 |
| IGFBP7                    | insulin-like growth factor binding protein 7                                             | 3.17E-04 | 1.14E-02 |
| IKZF1                     | IKAROS family zinc finger 1 (Ikaros)                                                     | 1.72E-03 | 4.10E-02 |
| ING4                      | inhibitor of growth family, member 4                                                     | 1.09E-06 | 1.39E-04 |
| IPMK                      | inositol polyphosphate multikinase                                                       | 5.25E-04 | 1.67E-02 |
| IQGAP2                    | IQ motif containing GTPase activating protein 2                                          | 8.51E-04 | 2.38E-02 |
| ITGA4                     | integrin, alpha 4 (antigen CD49D, alpha 4 subunit of VLA-4 receptor)                     | 5.23E-06 | 4.77E-04 |
| JAK2                      | Janus kinase 2                                                                           | 5.67E-07 | 7.92E-05 |
| JMJD1C                    | jumonji domain containing 1C                                                             | 1.42E-05 | 1.05E-03 |
| KIAA1033                  | KIAA1033                                                                                 | 7.58E-05 | 3.95E-03 |
| kihire                    |                                                                                          | 2.02E-03 | 4.56E-02 |
| KLF13                     | Kruppel-like factor 13                                                                   | 1.75E-03 | 4.14E-02 |
| LACTB                     | lactamase, beta                                                                          | 2.22E-07 | 3.77E-05 |
| LAPTM4A                   | lysosomal protein transmembrane 4 alpha                                                  | 1.81E-03 | 4.20E-02 |
| LEMD3                     | LEM domain containing 3                                                                  | 4.59E-04 | 1.54E-02 |
| LILRA3                    | leukocyte immunoglobulin-like receptor, subfamily A (without TM domain), member 3        | 6.01E-04 | 1.84E-02 |
| LMBRD1                    | LMBR1 domain containing 1                                                                | 1.82E-03 | 4.21E-02 |

|                     |                                                                                                                                                            |          |          |
|---------------------|------------------------------------------------------------------------------------------------------------------------------------------------------------|----------|----------|
| LMO4                | LIM domain only 4                                                                                                                                          | 1.07E-04 | 5.08E-03 |
| LOC100093631        | general transcription factor II, i; general transcription factor II, i, pseudogene                                                                         | 1.74E-04 | 7.26E-03 |
| LOC100132062        | hypothetical LOC100132062                                                                                                                                  | 2.07E-03 | 4.63E-02 |
| LOC100288778        | similar to WAS protein family homolog 1                                                                                                                    | 1.53E-04 | 6.62E-03 |
| LOC146880           | hypothetical LOC146880                                                                                                                                     | 5.27E-04 | 1.67E-02 |
| LOC728054           | hypothetical LOC728054                                                                                                                                     | 1.76E-06 | 2.01E-04 |
| LPCAT2/CAPNS2       | lysophosphatidylcholine acyltransferase 2/calpain, small subunit 2                                                                                         | 1.01E-04 | 4.87E-03 |
| LRMP                | lymphoid-restricted membrane protein                                                                                                                       | 8.68E-04 | 2.42E-02 |
| LRRFIP2             | leucine rich repeat (in FLII) interacting protein 2                                                                                                        | 6.70E-07 | 9.07E-05 |
| LRRK2               | leucine-rich repeat kinase 2                                                                                                                               | 2.43E-05 | 1.64E-03 |
| LTA4H               | leukotriene A4 hydrolase                                                                                                                                   | 8.88E-05 | 4.41E-03 |
| LY75/CD302          | lymphocyte antigen 75/CD302 molecule                                                                                                                       | 6.74E-18 | 2.01E-14 |
| MALAT1              | metastasis associated lung adenocarcinoma transcript 1 (non-protein coding)                                                                                | 1.73E-04 | 7.26E-03 |
| MAN1A1              | mannosidase, alpha, class 1A, member 1                                                                                                                     | 6.62E-05 | 3.61E-03 |
| MAT2B               | methionine adenosyltransferase II, beta                                                                                                                    | 1.16E-04 | 5.41E-03 |
| MCL1                | myeloid cell leukemia sequence 1 (BCL2-related)                                                                                                            | 2.05E-03 | 4.60E-02 |
| MED4                | mediator complex subunit 4                                                                                                                                 | 6.30E-06 | 5.52E-04 |
| MEGF9               | multiple EGF-like-domains 9                                                                                                                                | 1.54E-03 | 3.77E-02 |
| METTL9              | methyltransferase like 9                                                                                                                                   | 7.05E-08 | 1.46E-05 |
| MFSD1               | major facilitator superfamily domain containing 1                                                                                                          | 2.99E-05 | 1.95E-03 |
| MGST1               | microsomal glutathione S-transferase 1                                                                                                                     | 3.86E-05 | 2.33E-03 |
| MIAT                | myocardial infarction associated transcript (non-protein coding)                                                                                           | 9.16E-08 | 1.70E-05 |
| MICA/HCP5           | MHC class I polypeptide-related sequence A/HLA complex P5 (non-protein coding)                                                                             | 2.15E-05 | 1.50E-03 |
| MLX                 | MAX-like protein X                                                                                                                                         | 2.24E-03 | 4.89E-02 |
| MMADHC              | methylmalonic aciduria (cobalamin deficiency) cblD type, with homocystinuria                                                                               | 1.65E-04 | 7.08E-03 |
| MOBKL1B             | MOB1, Mps One Binder kinase activator-like 1B (yeast)                                                                                                      | 7.62E-11 | 4.25E-08 |
| MPPE1               | metallophosphoesterase 1                                                                                                                                   | 4.29E-13 | 6.39E-10 |
| MRPL15              | mitochondrial ribosomal protein L15                                                                                                                        | 6.55E-04 | 1.96E-02 |
| MS4A6E/MS4A7/MS4A14 | membrane-spanning 4-domains, subfamily A, member 6E/membrane-spanning 4-domains, subfamily A, member 7/membrane-spanning 4-domains, subfamily A, member 14 | 1.84E-04 | 7.55E-03 |
| MSMB/NCOA4          | microseminoprotein, beta-/nuclear receptor coactivator 4                                                                                                   | 9.13E-06 | 7.48E-04 |



|                                              |                                                                                                                                                                       |          |          |
|----------------------------------------------|-----------------------------------------------------------------------------------------------------------------------------------------------------------------------|----------|----------|
| MTCH1                                        | mitochondrial carrier homolog 1 ( <i>C. elegans</i> )                                                                                                                 | 1.04E-03 | 2.76E-02 |
| MTMR1                                        | myotubularin related protein 1                                                                                                                                        | 7.73E-04 | 2.21E-02 |
| MTMR6                                        | myotubularin related protein 6                                                                                                                                        | 5.13E-04 | 1.67E-02 |
| MTO1                                         | mitochondrial translation optimization 1 homolog ( <i>S. cerevisiae</i> )                                                                                             | 3.83E-05 | 2.33E-03 |
| MTPN/LUZP6                                   | myotrophin/leucine zipper protein 6                                                                                                                                   | 5.15E-04 | 1.67E-02 |
| MX1                                          | myxovirus (influenza virus) resistance 1, interferon-inducible protein p78 (mouse)                                                                                    | 3.36E-12 | 3.00E-09 |
| MYL12A                                       | myosin, light chain 12A, regulatory, non-sarcomeric                                                                                                                   | 1.66E-06 | 1.95E-04 |
| MYLIP                                        | myosin regulatory light chain interacting protein                                                                                                                     | 1.61E-03 | 3.88E-02 |
| NAB1                                         | NGFI-A binding protein 1 (EGR1 binding protein 1)                                                                                                                     | 7.51E-05 | 3.95E-03 |
| NAP1L1                                       | nucleosome assembly protein 1-like 1                                                                                                                                  | 1.58E-03 | 3.84E-02 |
| NAPSB                                        | napsin B aspartic peptidase pseudogene                                                                                                                                | 5.81E-06 | 5.14E-04 |
| NARS                                         | asparaginyl-tRNA synthetase                                                                                                                                           | 1.26E-04 | 5.70E-03 |
| NBPF9/NOTCH2NL/NBPF10                        | neuroblastoma breakpoint family, member 9/notch 2 N-terminal like/neuroblastoma breakpoint family, member 10                                                          | 7.79E-04 | 2.21E-02 |
| NBR2/NBR1                                    | neighbor of BRCA1 gene 2 (non-protein coding)/neighbor of BRCA1 gene 1                                                                                                | 1.77E-03 | 4.15E-02 |
| NCRNA00189<br>(LINC00189)/GAPDHP14/BAC<br>H1 | long intergenic non-protein coding RNA 189/glyceraldehyde-3-phosphate dehydrogenase pseudogene 14/BTB and CNC homology 1, basic leucine zipper transcription factor 1 | 4.89E-06 | 4.50E-04 |
| NDFIP1                                       | Nedd4 family interacting protein 1                                                                                                                                    | 2.26E-03 | 4.91E-02 |
| NEK9                                         | NIMA (never in mitosis gene a)- related kinase 9                                                                                                                      | 2.94E-04 | 1.09E-02 |
| NFE2L2                                       | nuclear factor (erythroid-derived 2)-like 2                                                                                                                           | 3.18E-04 | 1.14E-02 |
| NR3C1                                        | nuclear receptor subfamily 3, group C, member 1 (glucocorticoid receptor)                                                                                             | 3.02E-06 | 3.14E-04 |
| NSUN2                                        | NOL1/NOP2/Sun domain family, member 2                                                                                                                                 | 8.40E-06 | 7.02E-04 |
| OAS2                                         | 2'-5'-oligoadenylate synthetase 2, 69/71kDa                                                                                                                           | 2.12E-04 | 8.51E-03 |
| OAS3                                         | 2'-5'-oligoadenylate synthetase 3, 100kDa                                                                                                                             | 1.07E-03 | 2.84E-02 |
| OAZ2                                         | ornithine decarboxylase antizyme 2                                                                                                                                    | 7.72E-04 | 2.21E-02 |
| OGFRL1                                       | opioid growth factor receptor-like 1                                                                                                                                  | 4.09E-04 | 1.42E-02 |
| PAFAH1B1                                     | platelet-activating factor acetylhydrolase, isoform 1b, subunit 1 (45kDa)                                                                                             | 4.60E-05 | 2.67E-03 |
| PAN2/CNPY2/CS                                | PAN2 poly(A) specific ribonuclease subunit/canopy FGF signaling regulator 2/<br>citrate synthase                                                                      | 2.94E-05 | 1.93E-03 |
| PAPOLA                                       | poly(A) polymerase alpha                                                                                                                                              | 1.41E-03 | 3.55E-02 |

|                            |                                                                                                              |          |          |
|----------------------------|--------------------------------------------------------------------------------------------------------------|----------|----------|
| PARP14                     | poly (ADP-ribose) polymerase family, member 14                                                               | 3.54E-08 | 7.91E-06 |
| PARP9                      | poly (ADP-ribose) polymerase family, member 9                                                                | 1.25E-04 | 5.67E-03 |
| PCMTD2                     | protein-L-isoaspartate (D-aspartate) O-methyltransferase domain containing 2                                 | 9.19E-05 | 4.51E-03 |
| PDPR                       | pyruvate dehydrogenase phosphatase regulatory subunit                                                        | 3.87E-04 | 1.35E-02 |
| PELI1                      | pellino homolog 1 (Drosophila)                                                                               | 2.46E-07 | 4.07E-05 |
| PGK1                       | phosphoglycerate kinase 1                                                                                    | 2.08E-05 | 1.48E-03 |
| PHB2/SCARNA12              | prohibitin 2/SCARNA12                                                                                        | 6.25E-04 | 1.89E-02 |
| PHIP/TRNAF13P (TRF-GAA8-1) | pleckstrin homology domain interacting protein/<br>transfer RNA-Phe (GAA) 8-1                                | 2.70E-04 | 1.04E-02 |
| PJA2                       | praja ring finger 2                                                                                          | 4.33E-06 | 4.27E-04 |
| PLCL2                      | phospholipase C-like 2                                                                                       | 1.94E-03 | 4.40E-02 |
| PLDN (BLOC1S6)/SQRDL       | biogenesis of lysosomal organelles complex-1, subunit 6, pallidin/<br>sulfide quinone reductase-like (yeast) | 2.21E-03 | 4.84E-02 |
| PLEK                       | pleckstrin                                                                                                   | 1.86E-09 | 5.93E-07 |
| PLEKHB2                    | pleckstrin homology domain containing, family B (evectins) member 2                                          | 3.65E-07 | 5.45E-05 |
| PLEKHM1P                   | pleckstrin homology domain containing, family M (with RUN domain) member 1 pseudogene                        | 4.23E-04 | 1.44E-02 |
| PNRC1                      | proline-rich nuclear receptor coactivator 1                                                                  | 1.57E-03 | 3.82E-02 |
| PPIL3/CLK1                 | peptidylprolyl isomerase (cyclophilin)-like 3/CDC-like kinase 1                                              | 5.88E-04 | 1.81E-02 |
| PPP1CB/SPDYA               | protein phosphatase 1, catalytic subunit, beta isozyme/speedy/RINGO cell cycle regulator family<br>member A  | 4.45E-06 | 4.29E-04 |
| PPP1CC                     | protein phosphatase 1, catalytic subunit, gamma isoform                                                      | 8.17E-05 | 4.13E-03 |
| PPP1R15B                   | protein phosphatase 1, regulatory (inhibitor) subunit 15B                                                    | 1.38E-03 | 3.50E-02 |
| PPP2R5A                    | protein phosphatase 2, regulatory subunit B', alpha isoform                                                  | 1.25E-07 | 2.24E-05 |
| PPP3CB                     | protein phosphatase 3 (formerly 2B), catalytic subunit, beta isoform                                         | 2.19E-04 | 8.68E-03 |
| PPP3R1/WDR92               | protein phosphatase 3, regulatory subunit B, alpha/WD repeat domain 92                                       | 1.50E-06 | 1.79E-04 |
| PPP4R1                     | protein phosphatase 4, regulatory subunit 1                                                                  | 5.17E-04 | 1.67E-02 |
| PPP6C                      | protein phosphatase 6, catalytic subunit                                                                     | 1.84E-04 | 7.55E-03 |
| PPTC7                      | PTC7 protein phosphatase homolog (S. cerevisiae)                                                             | 4.64E-05 | 2.67E-03 |
| PRCP                       | prolylcarboxypeptidase (angiotensinase C)                                                                    | 1.01E-03 | 2.72E-02 |
| PRMT2                      | protein arginine methyltransferase 2                                                                         | 1.75E-03 | 4.14E-02 |
| PRNP                       | prion protein                                                                                                | 5.70E-04 | 1.77E-02 |

|                      |                                                                                                             |          |          |
|----------------------|-------------------------------------------------------------------------------------------------------------|----------|----------|
| PRPF38B              | PRP38 pre-mRNA processing factor 38 (yeast) domain containing B                                             | 7.61E-04 | 2.21E-02 |
| PSMA1/COPB1          | proteasome (prosome, macropain) subunit, alpha type, 1/coatomer protein complex, subunit beta 1             | 2.16E-03 | 4.76E-02 |
| PSMB3                | proteasome (prosome, macropain) subunit, beta type, 3                                                       | 2.03E-03 | 4.56E-02 |
| PSMB8                | proteasome (prosome, macropain) subunit, beta type, 8 (large multifunctional peptidase 7)                   | 6.21E-05 | 3.42E-03 |
| PSMD13               | proteasome (prosome, macropain) 26S subunit, non-ATPase, 13                                                 | 8.66E-07 | 1.14E-04 |
| PSMD6                | proteasome (prosome, macropain) 26S subunit, non-ATPase, 6                                                  | 3.66E-07 | 5.45E-05 |
| PTGER4               | prostaglandin E receptor 4 (subtype EP4)                                                                    | 6.30E-04 | 1.90E-02 |
| PTPRC                | protein tyrosine phosphatase, receptor type, C                                                              | 1.77E-23 | 1.59E-19 |
| PXK                  | PX domain containing serine/threonine kinase                                                                | 2.74E-04 | 1.04E-02 |
| RAB10                | RAB10, member RAS oncogene family                                                                           | 8.67E-07 | 1.14E-04 |
| RAB1A                | RAB1A, member RAS oncogene family                                                                           | 1.18E-04 | 5.47E-03 |
| RAB32                | RAB32, member RAS oncogene family                                                                           | 1.48E-03 | 3.67E-02 |
| RAB6A                | RAB6C, member RAS oncogene family; RAB6A, member RAS oncogene family; hypothetical LOC100130819; RAB6C-like | 1.20E-04 | 5.51E-03 |
| RAB8B                | RAB8B, member RAS oncogene family                                                                           | 2.86E-04 | 1.08E-02 |
| RAD21                | RAD21 homolog (S. pombe)                                                                                    | 2.14E-03 | 4.74E-02 |
| RAF1                 | v-raf-1 murine leukemia viral oncogene homolog 1                                                            | 4.83E-04 | 1.61E-02 |
| RAP1A                | RAP1A, member of RAS oncogene family                                                                        | 4.21E-09 | 1.21E-06 |
| RAP1B                | RAP1B, member of RAS oncogene family                                                                        | 3.01E-12 | 2.99E-09 |
| RASSF3               | Ras association (RalGDS/AF-6) domain family member 3                                                        | 1.51E-03 | 3.70E-02 |
| RBBP4                | hypothetical LOC642954; retinoblastoma binding protein 4                                                    | 9.69E-04 | 2.64E-02 |
| RBL2                 | retinoblastoma-like 2 (p130)                                                                                | 4.62E-06 | 4.30E-04 |
| RECQL                | RecQ protein-like (DNA helicase Q1-like)                                                                    | 4.93E-05 | 2.82E-03 |
| RFWD2                | ring finger and WD repeat domain 2                                                                          | 9.23E-06 | 7.50E-04 |
| RGS18                | regulator of G-protein signaling 18                                                                         | 8.81E-04 | 2.43E-02 |
| RICTOR               | RPTOR independent companion of MTOR, complex 2                                                              | 3.07E-08 | 7.22E-06 |
| RILPL2               | Rab interacting lysosomal protein-like 2                                                                    | 4.59E-06 | 4.30E-04 |
| RIT1                 | Ras-like without CAAX 1                                                                                     | 1.18E-04 | 5.47E-03 |
| RNF103/VPS24 (CHMP3) | ring finger protein 103/charged multivesicular body protein 3                                               | 5.29E-04 | 1.67E-02 |
| RNF13                | ring finger protein 13                                                                                      | 1.73E-08 | 4.30E-06 |

|                    |                                                                                                                                |          |          |
|--------------------|--------------------------------------------------------------------------------------------------------------------------------|----------|----------|
| RNF141             | ring finger protein 141                                                                                                        | 1.20E-05 | 9.15E-04 |
| RNF145             | ring finger protein 145                                                                                                        | 7.82E-09 | 2.06E-06 |
| RNF213             | ring finger protein 213                                                                                                        | 1.13E-10 | 5.60E-08 |
| RNF31/IRF9         | ring finger protein 31/interferon regulatory factor 9                                                                          | 2.70E-04 | 1.04E-02 |
| RNF5               | ring finger protein 5; ring finger protein 5 pseudogene 1                                                                      | 1.97E-03 | 4.45E-02 |
| RNF6               | ring finger protein (C3H2C3 type) 6                                                                                            | 4.21E-04 | 1.44E-02 |
| ROCK1              | similar to Rho-associated, coiled-coil containing protein kinase 1; Rho-associated, coiled-coil containing protein kinase 1    | 1.46E-03 | 3.65E-02 |
| RPL14.1            | ribosomal protein L14                                                                                                          | 1.80E-03 | 4.19E-02 |
| S100A6             | S100 calcium binding protein A6                                                                                                | 1.51E-03 | 3.70E-02 |
| SACM1L             | SAC1 suppressor of actin mutations 1-like (yeast)                                                                              | 5.04E-04 | 1.66E-02 |
| SAR1A/TYSND1/AIFM2 | secretion associated, Ras related GTPase 1A/trypsin domain containing 1/apoptosis-inducing factor, mitochondrion-associated, 2 | 3.26E-07 | 5.12E-05 |
| SCP2               | sterol carrier protein 2                                                                                                       | 4.97E-05 | 2.83E-03 |
| SCPEP1             | serine carboxypeptidase 1                                                                                                      | 8.05E-05 | 4.11E-03 |
| SDHD               | succinate dehydrogenase complex, subunit D, integral membrane protein                                                          | 2.18E-03 | 4.80E-02 |
| SEC22B             | SEC22 vesicle trafficking protein homolog B ( <i>S. cerevisiae</i> )                                                           | 4.13E-04 | 1.42E-02 |
| SEC61B             | Sec61 beta subunit                                                                                                             | 8.05E-05 | 4.11E-03 |
| SELE/SELL          | selectin E/selectin L                                                                                                          | 2.96E-04 | 1.10E-02 |
| SENP6              | SUMO1/sentrin specific peptidase 6                                                                                             | 1.73E-03 | 4.10E-02 |
| SEPT5/GP1BB        | septin 5/glycoprotein Ib (platelet), beta polypeptide                                                                          | 1.31E-03 | 3.38E-02 |
| SERINC1            | serine incorporator 1                                                                                                          | 1.36E-07 | 2.39E-05 |
| SERINC3            | serine incorporator 3                                                                                                          | 1.02E-04 | 4.88E-03 |
| SKAP2              | src kinase associated phosphoprotein 2                                                                                         | 1.03E-03 | 2.76E-02 |
| SKIV2L2            | superkiller viralicidic activity 2-like 2 ( <i>S. cerevisiae</i> )                                                             | 1.61E-04 | 6.94E-03 |
| SLA                | Src-like-adaptor                                                                                                               | 3.32E-04 | 1.18E-02 |
| SLBP               | stem-loop binding protein                                                                                                      | 1.87E-03 | 4.29E-02 |
| SLC12A7            | solute carrier family 12 (potassium/chloride transporters), member 7                                                           | 2.26E-03 | 4.91E-02 |
| SLC25A37           | solute carrier family 25, member 37                                                                                            | 9.13E-05 | 4.51E-03 |
| SLK                | STE20-like kinase (yeast)                                                                                                      | 1.49E-04 | 6.55E-03 |
| SLU7               | SLU7 splicing factor homolog ( <i>S. cerevisiae</i> )                                                                          | 8.40E-04 | 2.36E-02 |
| SMAP2              | small ArfGAP2                                                                                                                  | 1.92E-03 | 4.35E-02 |

|                      |                                                                                                                                                    |          |          |
|----------------------|----------------------------------------------------------------------------------------------------------------------------------------------------|----------|----------|
| SMARCA5              | SWI/SNF related, matrix associated, actin dependent regulator of chromatin, subfamily a, member 5                                                  | 9.51E-04 | 2.60E-02 |
| SMCHD1               | structural maintenance of chromosomes flexible hinge domain containing 1                                                                           | 2.21E-10 | 9.86E-08 |
| SNX10                | sorting nexin 10                                                                                                                                   | 1.40E-06 | 1.71E-04 |
| SNX14                | sorting nexin 14                                                                                                                                   | 2.09E-06 | 2.30E-04 |
| SNX2                 | sorting nexin 2                                                                                                                                    | 1.60E-03 | 3.88E-02 |
| SNX6                 | sorting nexin 6                                                                                                                                    | 3.38E-05 | 2.16E-03 |
| SP140L/SP100/HMGB1L3 | SP140 nuclear body protein-like/SP100 nuclear antigen/high mobility group box 1 pseudogene 3                                                       | 1.69E-04 | 7.17E-03 |
| SPATA13/C1QTNF9      | spermatogenesis associated 13/C1q and tumor necrosis factor related protein 9                                                                      | 1.80E-06 | 2.01E-04 |
| SPCS3                | signal peptidase complex subunit 3 homolog ( <i>S. cerevisiae</i> )                                                                                | 4.54E-06 | 4.30E-04 |
| SPOPL                | speckle-type POZ protein-like                                                                                                                      | 8.45E-10 | 3.02E-07 |
| SPPL2A               | signal peptide peptidase-like 2A                                                                                                                   | 3.22E-05 | 2.08E-03 |
| SRI                  | sorcin                                                                                                                                             | 3.49E-06 | 3.54E-04 |
| SRP9/EPHX1           | signal recognition particle 9kDa/epoxide hydrolase 1, microsomal (xenobiotic)                                                                      | 7.37E-08 | 1.50E-05 |
| SSFA2                | sperm specific antigen 2                                                                                                                           | 9.73E-04 | 2.64E-02 |
| ST8SIA4              | ST8 alpha-N-acetyl-neuraminide alpha-2,8-sialyltransferase 4                                                                                       | 1.14E-03 | 3.00E-02 |
| STAT1                | signal transducer and activator of transcription 1, 91kDa                                                                                          | 8.77E-04 | 2.43E-02 |
| STOM                 | stomatin                                                                                                                                           | 4.35E-05 | 2.56E-03 |
| STXBP3               | syntaxin binding protein 3                                                                                                                         | 1.24E-06 | 1.56E-04 |
| SURF4                | surfeit 4                                                                                                                                          | 1.20E-03 | 3.15E-02 |
| SYTL2                | synaptotagmin-like 2                                                                                                                               | 9.74E-04 | 2.64E-02 |
| TAF1                 | TAF1 RNA polymerase II, TATA box binding protein (TBP)-associated factor, 250kDa                                                                   | 4.42E-04 | 1.49E-02 |
| TAGAP                | T-cell activation RhoGTPase activating protein                                                                                                     | 1.01E-04 | 4.87E-03 |
| TAX1BP1              | Tax1 (human T-cell leukemia virus type I) binding protein 1                                                                                        | 1.91E-05 | 1.36E-03 |
| TBC1D2B              | TBC1 domain family, member 2B                                                                                                                      | 6.79E-05 | 3.66E-03 |
| TCF25/MC1R/TUBB3     | transcription factor 25 (basic helix-loop-helix)/melanocortin 1 receptor (alpha melanocyte stimulating hormone receptor)/tubulin, beta 3 class III | 2.12E-09 | 6.52E-07 |
| TCP11L2              | t-complex 11 (mouse)-like 2                                                                                                                        | 3.73E-04 | 1.31E-02 |
| TDG                  | similar to G/T mismatch-specific thymine DNA glycosylase; thymine-DNA glycosylase                                                                  | 1.87E-03 | 4.29E-02 |
| TDP2                 | tyrosyl-DNA phosphodiesterase 2                                                                                                                    | 1.70E-03 | 4.07E-02 |
| TES                  | testis derived transcript (3 LIM domains)                                                                                                          | 2.74E-04 | 1.04E-02 |

|              |                                                                                                                      |          |          |
|--------------|----------------------------------------------------------------------------------------------------------------------|----------|----------|
| TGFBR2       | transforming growth factor, beta receptor II (70/80kDa)                                                              | 1.05E-04 | 4.97E-03 |
| TM9SF2       | transmembrane 9 superfamily member 2                                                                                 | 2.95E-10 | 1.25E-07 |
| TM9SF3       | transmembrane 9 superfamily member 3                                                                                 | 1.74E-04 | 7.26E-03 |
| TMCC1        | transmembrane and coiled-coil domain family 1                                                                        | 2.13E-04 | 8.52E-03 |
| TMCO3        | transmembrane and coiled-coil domains 3                                                                              | 7.11E-05 | 3.78E-03 |
| TMEM167B     | transmembrane protein 167B                                                                                           | 2.78E-05 | 1.85E-03 |
| TMEM222      | transmembrane protein 222                                                                                            | 1.41E-04 | 6.27E-03 |
| TMEM49       | transmembrane protein 49                                                                                             | 5.38E-06 | 4.86E-04 |
| TMEM59       | transmembrane protein 59                                                                                             | 8.49E-05 | 4.26E-03 |
| TMSB4X       | thymosin-like 2 (pseudogene); thymosin-like 1 (pseudogene); thymosin beta 4, X-linked                                | 6.06E-04 | 1.85E-02 |
| TNFSF13B     | tumor necrosis factor (ligand) superfamily, member 13b                                                               | 3.47E-04 | 1.23E-02 |
| TNKS2        | tankyrase, TRF1-interacting ankyrin-related ADP-ribose polymerase 2                                                  | 8.73E-04 | 2.42E-02 |
| TNPO3        | transportin 3                                                                                                        | 4.02E-05 | 2.41E-03 |
| TOPORS/DDX58 | topoisomerase I binding, arginine/serine-rich, E3 ubiquitin protein ligase/DEAD (Asp-Glu-Ala-Asp) box polypeptide 58 | 6.89E-04 | 2.03E-02 |
| TOR1A        | torsin family 1, member A (torsin A)                                                                                 | 1.11E-07 | 2.02E-05 |
| TOR1AIP1     | torsin A interacting protein 1                                                                                       | 5.49E-04 | 1.73E-02 |
| TPM3         | tropomyosin 3                                                                                                        | 4.32E-07 | 6.23E-05 |
| TRAM1        | translocation associated membrane protein 1                                                                          | 1.79E-06 | 2.01E-04 |
| TRPC4AP      | transient receptor potential cation channel, subfamily C, member 4 associated protein                                | 1.30E-05 | 9.81E-04 |
| TSNAX/DISC1  | translin-associated factor X/disrupted in schizophrenia 1                                                            | 4.89E-04 | 1.62E-02 |
| TSPAN14      | tetraspanin 14                                                                                                       | 1.16E-05 | 8.98E-04 |
| TXNRD1       | thioredoxin reductase 1; hypothetical LOC100130902                                                                   | 8.52E-08 | 1.65E-05 |
| U2AF1        | U2 small nuclear RNA auxiliary factor 1                                                                              | 3.82E-05 | 2.33E-03 |
| UBE2B        | ubiquitin-conjugating enzyme E2B (RAD6 homolog)                                                                      | 2.65E-04 | 1.02E-02 |
| UBE2E3       | ubiquitin-conjugating enzyme E2E 3 (UBC4/5 homolog, yeast)                                                           | 6.50E-04 | 1.95E-02 |
| UBL7         | ubiquitin-like 7 (bone marrow stromal cell-derived)                                                                  | 2.09E-03 | 4.66E-02 |
| UBR2         | ubiquitin protein ligase E3 component n-recogin 2                                                                    | 7.78E-04 | 2.21E-02 |
| UHMK1        | U2AF homology motif (UHM) kinase 1                                                                                   | 1.28E-03 | 3.32E-02 |
| USP1         | ubiquitin specific peptidase 1                                                                                       | 1.36E-03 | 3.47E-02 |
| USP15        | ubiquitin specific peptidase 15                                                                                      | 2.60E-05 | 1.75E-03 |
| USP33        | ubiquitin specific peptidase 33                                                                                      | 7.17E-04 | 2.09E-02 |

|                      |                                                                                                                                                                                                      |          |          |
|----------------------|------------------------------------------------------------------------------------------------------------------------------------------------------------------------------------------------------|----------|----------|
| UTRN                 | utrophin                                                                                                                                                                                             | 5.40E-15 | 9.66E-12 |
| VAMP3                | vesicle-associated membrane protein 3 (cellubrevin)                                                                                                                                                  | 1.62E-04 | 6.94E-03 |
| VCP                  | valosin-containing protein                                                                                                                                                                           | 6.72E-04 | 2.00E-02 |
| VNN2                 | vanin 2                                                                                                                                                                                              | 1.49E-03 | 3.69E-02 |
| VPS13C               | vacuolar protein sorting 13 homolog C ( <i>S. cerevisiae</i> )                                                                                                                                       | 3.31E-04 | 1.18E-02 |
| WARS                 | tryptophanyl-tRNA synthetase                                                                                                                                                                         | 1.44E-04 | 6.37E-03 |
| WDFY2                | WD repeat and FYVE domain containing 2                                                                                                                                                               | 1.87E-03 | 4.29E-02 |
| WSB1                 | WD repeat and SOCS box-containing 1                                                                                                                                                                  | 1.39E-04 | 6.20E-03 |
| yakeme               |                                                                                                                                                                                                      | 5.07E-04 | 1.66E-02 |
| YIPF4                | Yip1 domain family, member 4                                                                                                                                                                         | 2.65E-04 | 1.02E-02 |
| YWHAE                | similar to 14-3-3 protein epsilon (14-3-3E) (Mitochondrial import stimulation factor L subunit) (MSF L); tyrosine 3-monooxygenase/tryptophan 5-monooxygenase activation protein, epsilon polypeptide | 9.45E-10 | 3.13E-07 |
| ZBED5/EIF4G2/SNORD97 | zinc finger, BED-type containing 5/eukaryotic translation initiation factor 4 gamma, 2/small nucleolar RNA, C/D box 97                                                                               | 4.27E-04 | 1.45E-02 |
| ZCCHC6               | zinc finger, CCHC domain containing 6                                                                                                                                                                | 3.66E-05 | 2.26E-03 |
| ZEB2/GTDC1           | zinc finger E-box binding homeobox 2/glycosyltransferase-like domain containing 1                                                                                                                    | 1.36E-04 | 6.12E-03 |
| ZFAND5               | zinc finger, AN1-type domain 5                                                                                                                                                                       | 2.10E-05 | 1.48E-03 |
| ZFP91-CNTF           | zinc finger protein 91 homolog (mouse); ZFP91-CNTF readthrough transcript; ciliary neurotrophic factor                                                                                               | 9.98E-06 | 8.03E-04 |
| ZNF516               | zinc finger protein 516                                                                                                                                                                              | 2.98E-04 | 1.10E-02 |
| ZNF592               | zinc finger protein 592                                                                                                                                                                              | 1.35E-03 | 3.45E-02 |
