# Supplementary material for: Intracerebral Hemorrhage and Ischemic Stroke of Different Etiologies Have Distinct Alternatively Spliced mRNA Profiles in the Blood: a Pilot RNA-seq Study
Source: PubMed Central journal article supplement (PMC4485700; doi:10.1007/s12975-015-0407-9), 2015-05-22
Supplement: 12975_2015_407_MOESM5_ESM.pdf [file 12975_2015_407_MOESM5_ESM.pdf]

SUPPLEMENTARY TABLE 5. Functions Associated with the Top 2 Molecular and Cellular Functions Over-Represented in the 412 Differentially Alternatively Spliced Genes

| Categories                                                                                                                                                                           | Diseases or Functions Annotation            | p-Value              | Molecules                                                                                                                                                                                                                                                                                                                                                                                                                                                                                                                                                                                                                                                                                                                                                                                                                                                                                                                                                                          | # Molecules |
|--------------------------------------------------------------------------------------------------------------------------------------------------------------------------------------|---------------------------------------------|----------------------|------------------------------------------------------------------------------------------------------------------------------------------------------------------------------------------------------------------------------------------------------------------------------------------------------------------------------------------------------------------------------------------------------------------------------------------------------------------------------------------------------------------------------------------------------------------------------------------------------------------------------------------------------------------------------------------------------------------------------------------------------------------------------------------------------------------------------------------------------------------------------------------------------------------------------------------------------------------------------------|-------------|
| Cell Death and Survival                                                                                                                                                              | cell death                                  | 1.32E-09             | ACSL4,AIFM2,AKAP8,ANXA1,ANXA7,APAF1,APH1A,APIP,APOBEC3B,ARL6IP5,ARNTL,ATM,ATP2B4,ATP6V1G2,BAZ1A,BRAT1,C1QTNF9,CALM1 (includes others), CARD8,CCAR1,CCT8,CD164,CD244,CD36,CD46,CD47,CD53,CD74,CD86,CDC42,CDKN1C,CFLAR,CHMP3,CNPY2,CTSS,CYBB,CYLD,DAP3,DDX19A,DDX3X,DDX58,DNAJB6,DPYD,DUSP22,EGLN1,EIF2AK2,EIF2S1,EIF4G2,EPHB4,EPHX1,ERN1,FCER1A,FKBP1A,FNTA,GLRX,GLUD1,GMCL1,GPX1,GZMA,HEXB,HIPK3,HLA-DMA,HLA-DRB1,HMGB1,IFIH1,IFNAR1,IFNGR1,IFRD1,IGFBP7,ING4,IPMK,IQGAP2,ITGA4,JAK2,KLF13,LMO4,LRRK2,MC1R,MCL1,MICA,MOB1A, MTCH1,MTMR6,MTPN,MX1, NCOA4,NFE2L2, NR3C1, OAS3, PAFAH1B1,PARP14,PHB2,PHIP,PPP1CC,PPP1R15B,PPP2CA, PPP2R5A, PPP3CB, PPP3R1, PRMT2,PRNP, PSMB8, PSMD6,PTGER4, PTPRC, RAB1A,RAB32,RAD21,RAF1,RAP1A,RAP1B,RASSF3,RBBP4,RBL2,RECQL,RFWD2,RICTOR, RIT1,RNF13,RNF31, RNF5,ROCK1, S100A6,SCP2,SELL, SERINC3, SLC12A7,SLK,SMARCA5,SRI,ST8SIA4,STAT1,TAX1BP1,TDP2,TGFBR2,TMSB10/TMSB4X,TNFSF13B,TNKS2,TPORS,TPM3,TUBB3,TXNRD1,UBE2B,VAMP3,VCP,YWHAE,ZEB2,ZFAND5 | 148         |
| Cell Death and Survival                                                                                                                                                              | apoptosis                                   | 4.11E-09             | ACSL4,AIFM2,AKAP8,ANXA1,ANXA7,APAF1,APH1A,APIP,APOBEC3B,ARL6IP5,ATM,ATP2B4,ATP6V1G2,BAZ1A,BRAT1,C1QTNF9,CARD8,CCAR1,CD164,CD36,CD47,CD53,CD74,CD86,CDC42,CDKN1C,CFLAR,CHMP3,CNPY2,CTSS,CYBB,CYLD,DAP3,DDX19A,DDX3X,DDX58,DUSP22,EIF2AK2,EIF2S1,EIF4G2,EPHB4,EPHX1,ERN1,FCER1A,FKBP1A,FNTA,GLRX,GLUD1,GMCL1,GPX1,GZMA,HEXB,HIPK3,HLA-DMA,HMGB1,IFIH1,IFNAR1,IFNGR1,IGFBP7, ING4,IQGAP2,ITGA4,JAK2,KLF13,LMO4,LRRK2,MC1R,MCL1,MOB1A, MTCH1,MTMR6,MTPN,MX1,NCOA4,NFE2L2,NR3C1,OAS3,PAFAH1B1,PARP14,PHB2,PHIP,PPP1CC,PPP2CA,PPP3CB,PPP3R1,PRMT2,PRNP,PSMB8,PSMD6,PTGER4,PTPRC,RAB32,RAD21,RAF1,RAP1A,RAP1B,RASSF3,RBBP4,RBL2,RFWD2,RICTOR,RIT1,RNF13,RNF31,RNF5,ROCK1,S100A6,SELL,SERINC3,SLK,SRI,ST8SIA4,STAT1,TAX1BP1,TDP2,TGFBR2,TMSB10/TMSB4X,TNFSF13B,TPORS,TXNRD1,UBE2B,VCP,YWHAE,ZEB2,ZFAND5                                                                                                                                                                                    | 122         |
| Cell Death and Survival                                                                                                                                                              | necrosis                                    | 6.80E-05             | ANXA1,APAF1,APIP,APOBEC3B,ATM,ATP2B4,ATP6V1G2,BAZ1A,BRAT1,C1QTNF9,CARD8,CCAR1,CCT8,CD36,CD47,CD74,CD86,CDC42,CDKN1C,CFLAR,CNPY2,CTSS,CYBB,CYLD,DAP3,DDX3X,DDX58,DPYD,EGLN1,EIF2AK2,EIF2S1,EIF4G2,EPHB4,EPHX1,ERN1,FCER1A,FKBP1A,FNTA,GLRX,GLUD1,GMCL1,GPX1,GZMA,HLA-DMA,HMGB1,IFIH1,IFNAR1,IFNGR1,IFRD1,IGFBP7,IPMK,IQGAP2,ITGA4,JAK2,KLF13,LMO4,LRRK2,MC1R,MCL1,MTMR6,MTPN,MX1,NFE2L2,NR3C1,OAS3,PAFAH1B1,PARP14,PHIP,PPP1CC,PPP2CA,PPP3CB,PPP3R1,PRMT2,PRNP,PSMB8,PSMD6,PTGER4,PTPRC,RAB32,RAD21,RAF1,RASSF3,RBBP4,RBL2,RECQL,RFWD2,RICTOR,RIT1,RNF13,RNF31,RNF5,ROCK1,S100A6,SCP2,SELL,SLK,SRI,STAT1,TAX1BP1,TDP2,TGFBR2,TMSB10/TMSB4X,TNFSF13B,TUBB3,TXNRD1,VCP,YWHAE                                                                                                                                                                                                                                                                                                          | 106         |
| Cell Death and Survival                                                                                                                                                              | cell viability                              | 2.26E-04             | APAF1,APOBEC3A,ATM,C1QTNF9,CD47,CD74,CD86,CDC42,CDKL3,CDKN1C,CFLAR,CYBB,CYLD,DPYD,DUSP22,EPHB4,ERN1,FCER1A,GLUD1,GPX1,HMGB1,IFIH1,IGFBP7,IRF9,JAK2,LRRK2,MCL1,MGST1,MTMR1,MTMR6,MX1,NFE2L2,NR3C1,PARP14,PPP1CB,PPP1CC,PPP2CA,PPP2R5A,PPP4R1,PPP6C,PRNP,PSMA1,PTPRC,RAD21,RAF1,RBBP4,RICTOR,RIT1,RNF31,S100A6,SELE,SELL,SPDYA,STAT1,TDP2,TGFBR2,TNFSF13B,TUBB3,VCP                                                                                                                                                                                                                                                                                                                                                                                                                                                                                                                                                                                                                  | 59          |
| Cell Death and Survival, DNA Replication, Recombination, and Repair                                                                                                                  | fragmentation of DNA                        | 3.36E-04             | APAF1,APOBEC3B,CD53,EIF2AK2,GPX1,GZMA,MCL1,MTCH1,NR3C1,PPP1CC,PRNP,SERINC3,STAT1                                                                                                                                                                                                                                                                                                                                                                                                                                                                                                                                                                                                                                                                                                                                                                                                                                                                                                   | 13          |
| Cell Death and Survival                                                                                                                                                              | cell death of tumor cell lines              | 3.43E-04             | APAF1,ATM,BAZ1A,BRAT1,CARD8,CCAR1,CCT8,CD47,CDC42,CDKN1C,CFLAR,CNPY2,CYLD,DAP3,DDX3X,DDX58,DPYD,EGLN1,EIF2AK2,EIF2S1,EIF4G2,EPHB4,ERN1,FCER1A,FKBP1A,GLRX,GPX1,IFNAR1,IFRD1,IGFBP7,IPMK,IQGAP2,ITGA4,JAK2,LMO4,MCL1,MTMR6,NFE2L2,NR3C1,OAS3,PARP14,PHIP,PPP2CA,PRNP,PTPRC,RAB32,RAD21,RAF1,RASSF3,RBL2,RFWD2,RICTOR,RIT1,RNF13,RNF31,RNF5,S100A6,SRI,STAT1,TDP2,TGFBR2,TMSB10/TMSB4X,TNFSF13B,TUBB3,TXNRD1,VCP,YWHAE                                                                                                                                                                                                                                                                                                                                                                                                                                                                                                                                                               | 67          |
| Cell Death and Survival                                                                                                                                                              | cell survival                               | 3.95E-04             | APAF1,APOBEC3A,ATM,C1QTNF9,CD47,CD74,CD86,CDC42,CDKL3,CDKN1C,CFLAR,CYBB,CYLD,DDX3X,DPYD,DUSP22,EIF2S1,EPHB4,ERN1,FCER1A,GLRX,GLUD1,GPX1,HMGB1,IFIH1,IGFBP7,IRF9,JAK2,LRRK2,MCL1,MGST1,MTMR1,MTMR6,MX1,NFE2L2,NR3C1,PARP14,PPP1CB,PPP1CC,PPP2CA,PPP2R5A,PPP4R1,PPP6C,PRNP,PSMA1,PTPRC,RAD21,RAF1,RBBP4,RICTOR,RIT1,RNF31,S100A6,SELE,SELL,SPDYA,STAT1,TDP2,TGFBR2,TNFSF13B,TUBB3,VCP                                                                                                                                                                                                                                                                                                                                                                                                                                                                                                                                                                                                | 62          |
| Cell Death and Survival<br>Cardiovascular System<br>Development and Function, Cell Death and Survival, Cellular Development, Organ Morphology, Tissue Development, Tissue Morphology | cytolysis<br>regeneration of cardiomyocytes | 4.21E-04<br>4.91E-04 | ANXA1,CD244,CD46,CD47,FCER1A,GZMA,IFNAR1,MICA,NFE2L2,NR3C1,PPP3CB,PPP3R1,PTPRC,TGFBR2<br>HMGB1,MTPN                                                                                                                                                                                                                                                                                                                                                                                                                                                                                                                                                                                                                                                                                                                                                                                                                                                                                | 14<br>2     |
| Cell Death and Survival,<br>Connective Tissue Disorders,<br>Hematological Disease                                                                                                    | hemolysis                                   | 5.26E-04             | ANXA1,CD47,IFNAR1,NFE2L2,NR3C1,PPP3CB,PPP3R1                                                                                                                                                                                                                                                                                                                                                                                                                                                                                                                                                                                                                                                                                                                                                                                                                                                                                                                                       | 7           |
| Cell Death and Survival                                                                                                                                                              | cell death of immune cells                  | 5.41E-04             | ANXA1,APAF1,ATM,CD47,CD74,CD86,CDC42,CFLAR,CYBB,CYLD,EIF2AK2,ERN1,FCER1A,GZMA,HMGB1,IFIH1,IFNAR1,IFNGR1,ITGA4,JAK2,KLF13,MCL1,MX1,NFE2L2,NR3C1,PARP14,PPP3CB,PTGER4,PTPRC,RAF1,STAT1,TGFBR2,TNFSF13B                                                                                                                                                                                                                                                                                                                                                                                                                                                                                                                                                                                                                                                                                                                                                                               | 33          |

| Categories                                                                                         | Diseases or Functions Annotation             | p-Value  | Molecules                                                                                                                                                                                                                                                                                                                  | # Molecules |
|----------------------------------------------------------------------------------------------------|----------------------------------------------|----------|----------------------------------------------------------------------------------------------------------------------------------------------------------------------------------------------------------------------------------------------------------------------------------------------------------------------------|-------------|
| Cancer, Cell Death and Survival, Tumor Morphology                                                  | cell death of cancer cells                   | 8.29E-04 | ANXA1,APAF1,ATM,CD47,CD74,CFLAR,EIF2AK2,HMGB1,JAK2,LRRK2,MCL1,NFE2L2,NR3C1,PARP14,PRNP,RAF1,SELL,TNFSF13B                                                                                                                                                                                                                  | 18          |
| Cell Death and Survival                                                                            | cell death of kidney cell lines              | 8.85E-04 | APOBEC3B,CDC42,CFLAR,DAP3,EIF2AK2,ERN1,JAK2,MCL1,NFE2L2,PPP3R1,PRMT2,PRNP,RAD21,RAF1,RNF13,RNF31,SLK,VCP                                                                                                                                                                                                                   | 18          |
| Cell Death and Survival                                                                            | cell viability of tumor cell lines           | 9.22E-04 | ATM,CDKL3,CDKN1C,CFLAR,CYBB,DUSP22,EPHB4,GLUD1,GPX1,HMGB1,IGFBP7,MCL1,MTMR1,MTMR6,NFE2L2,NR3C1,PARP14,PPP1CC,PPP2CA,PPP2R5A,PPP4R1,PPP6C,PRNP,PSMA1,RAD21,RAF1,RBBP4,RICTOR,RIT1,RNF31,S100A6,TDP2,TGFBR2,TNFSF13B,TUBB3,VCP                                                                                               | 36          |
| Cell Death and Survival                                                                            | apoptosis of fibroblast cell lines           | 9.87E-04 | APAF1,ATM,ATP6V1G2,CFLAR,CYLD,DDX3X,EIF2AK2,EIF2S1,EPHX1,IFNAR1,MCL1,NFE2L2,NR3C1,PRNP,PSMD6,RBL2,RNF13,STAT1,TAX1BP1                                                                                                                                                                                                      | 19          |
| Cell Death and Survival, Connective Tissue Disorders, Hematological Disease                        | hemolytic anemia                             | 9.89E-04 | ANXA1,CD47,IFNAR1,NR3C1,PPP3CB,PPP3R1                                                                                                                                                                                                                                                                                      | 6           |
| Cancer, Cell Death and Survival, Tumor Morphology                                                  | cell death of tumor cells                    | 1.00E-03 | ANXA1,APAF1,ATM,CARD8,CD47,CD74,CFLAR,EIF2AK2,HMGB1,JAK2,LRRK2,MCL1,NFE2L2,NR3C1,PARP14,PPP2CA,PRNP,RAF1,SELL,TGFBR2,TNFSF13B                                                                                                                                                                                              | 21          |
| Cell Death and Survival                                                                            | cell death of connective tissue cells        | 1.27E-03 | APAF1,ATM,ATP6V1G2,CDC42,CFLAR,CYLD,DDX3X,DDX58,EIF2AK2,EIF2S1,EPHX1,FNTA,GPX1,GZMA,IFNAR1,MCL1,NFE2L2,NR3C1,PRMT2,PRNP,PSMD6,RAF1,RBL2,RECQL,RNF13,SCP2,SLK,STAT1,TAX1BP1,VCP                                                                                                                                             | 30          |
| Cell Death and Survival, Cellular Compromise, Neurological Disease, Tissue Morphology              | degeneration of nerve ending                 | 1.45E-03 | ARNTL,ATM                                                                                                                                                                                                                                                                                                                  | 2           |
| Cell Death and Survival, Respiratory Disease                                                       | quantity of apoptotic pneumocytes            | 1.45E-03 | CD36,NFE2L2                                                                                                                                                                                                                                                                                                                | 2           |
| Cell Death and Survival                                                                            | cell death of fibroblast cell lines          | 1.50E-03 | APAF1,ATM,ATP6V1G2,CFLAR,CYLD,DDX3X,EIF2AK2,EIF2S1,EPHX1,FNTA,IFNAR1,MCL1,NFE2L2,NR3C1,PRNP,PSMD6,RBL2,RECQL,RNF13,SCP2,STAT1,TAX1BP1,VCP                                                                                                                                                                                  | 23          |
| Cell Death and Survival                                                                            | cell death of thymocytes                     | 1.50E-03 | APAF1,ATM,CFLAR,CYLD,GZMA,KLF13,MCL1,NFE2L2,NR3C1,PTPRC                                                                                                                                                                                                                                                                    | 10          |
| Cell Death and Survival                                                                            | cell death of epithelial cells               | 1.52E-03 | APAF1,APOBEC3B,ATM,CDC42,CFLAR,CTSS,CYLD,DAP3,EIF2AK2,ERN1,HMGB1,IFNGR1,JAK2,MC1R,MCL1,NFE2L2,NR3C1,PPP3R1,PRMT2,PRNP,RAD21,RAF1,RBL2,RNF31,TGFBR2                                                                                                                                                                         | 25          |
| Cell Death and Survival                                                                            | mitochondrial cell death of tumor cell lines | 1.57E-03 | DDX58,MCL1,SRI                                                                                                                                                                                                                                                                                                             | 3           |
| Cell Death and Survival                                                                            | apoptosis of leukocytes                      | 1.61E-03 | ANXA1,ATM,CD47,CDC42,CFLAR,CYBB,CYLD,EIF2AK2,FCER1A,GZMA,HMGB1,IFNGR1,JAK2,KLF13,MCL1,NFE2L2,NR3C1,PPP3CB,PTGER4,PTPRC,RAF1,STAT1,TNFSF13B                                                                                                                                                                                 | 23          |
| Cell Death and Survival                                                                            | apoptosis of tumor cell lines                | 1.73E-03 | APAF1,ATM,BAZ1A,BRAT1,CARD8,CCAR1,CD47,CDC42,CDKN1C,CFLAR,CYLD,DDX58,EIF2AK2,EIF4G2,EPHB4,ERN1,FCER1A,GLRX,GPX1,IGFBP7,JAK2,LMO4,MCL1,MTMR6,NFE2L2,NR3C1,OAS3,PARP14,PHIP,PPP2CA,PRNP,PTPRC,RAB32,RAD21,RAF1,RASSF3,RBL2,RICTOR,RIT1,RNF13,RNF31,RNF5,S100A6,SRI,STAT1,TDP2,TGFBR2,TMSB10/TMSB4X,TNFSF13B,TXNRD1,VCP,YWHAE | 52          |
| Cell Death and Survival, Connective Tissue Disorders, Hematological Disease, Immunological Disease | autoimmune hemolytic anemia                  | 1.78E-03 | CD47,NR3C1,PPP3CB,PPP3R1                                                                                                                                                                                                                                                                                                   | 4           |
| Cell Death and Survival                                                                            | cell viability of cervical cancer cell lines | 1.89E-03 | ATM,CDKL3,DUSP22,MCL1,MTMR1,MTMR6,PPP1CC,PPP2CA,PPP2R5A,PPP4R1,PPP6C,RAD21,TGFBR2                                                                                                                                                                                                                                          | 13          |

| Categories                                        | Diseases or Functions Annotation                 | p-Value  | Molecules                                                                                                                                                          | # Molecules |
|---------------------------------------------------|--------------------------------------------------|----------|--------------------------------------------------------------------------------------------------------------------------------------------------------------------|-------------|
| Cell Death and Survival                           | cell death of colon cancer cell lines            | 1.97E-03 | APAF1,CCAR1,CDC42,CDKN1C,CFLAR,EPHB4,MCL1,RAF1,RASSF3,SRI,STAT1,TGFBR2,TMSB10/TMSB4X,TXNRD1,VCP,YWHAE                                                              | 16          |
| Cell Death and Survival                           | cell viability of leukocytes                     | 2.26E-03 | CD47,CD74,CD86,CYLD,ERN1,FCER1A,HMGB1,JAK2,MCL1,MX1,PARP14,PTPRC,RAF1,STAT1,TNFSF13B                                                                               | 15          |
| Cell Death and Survival                           | killing of natural killer cells                  | 2.42E-03 | CD244,IFNAR1,IFNGR1,STAT1                                                                                                                                          | 4           |
| Cell Death and Survival                           | cell death of myeloid cells                      | 2.46E-03 | ANXA1,CFLAR,CYBB,EIF2AK2,FCER1A,HMGB1,IFNAR1,JAK2,MCL1,NFE2L2,NR3C1,RAF1,STAT1                                                                                     | 13          |
| Cell Death and Survival                           | cell death of epithelial cell lines              | 2.68E-03 | APOBEC3B,CDC42,CFLAR,DAP3,EIF2AK2,ERN1,JAK2,MCL1,NFE2L2,PPP3R1,PRMT2,PRNP,RAD21,RAF1,RNF31,TGFBR2                                                                  | 16          |
| Cell Death and Survival                           | necrosis of epithelial tissue                    | 2.81E-03 | APAF1,APOBEC3B,ATM,CD36,CDC42,CFLAR,CTSS,CYLD,DAP3,EIF2AK2,ERN1,GPX1,HMGB1,IFNGR1,JAK2,MC1R,MCL1,NFE2L2,NR3C1,PPP3R1,PRMT2,PRNP,PSMB8,RAD21,RAF1,RBL2,RNF31,TGFBR2 | 28          |
| Cell Death and Survival                           | cell viability of blood cells                    | 2.85E-03 | CD47,CD74,CD86,CYLD,ERN1,FCER1A,HMGB1,JAK2,MCL1,MX1,PARP14,PTPRC,RAF1,SELE,STAT1,TNFSF13B                                                                          | 16          |
| Cell Death and Survival                           | cytotoxicity                                     | 2.87E-03 | CALM1 (includes others),CD244,CD46,CD74,CFLAR,CYBB,FKBP1A,GZMA,HLA-DRB1,IFNAR1,MICA,PTPRC,STAT1,TGFBR2                                                             | 14          |
| Cell Death and Survival, Embryonic Development    | cell death of embryonic cell lines               | 2.97E-03 | APOBEC3B,CDC42,CFLAR,DAP3,EIF2AK2,ERN1,IFNAR1,MCL1,NFE2L2,PPP3R1,PRMT2,PRNP,RAD21,RNF31                                                                            | 14          |
| Cancer, Cell Death and Survival, Tumor Morphology | cell death of leukemia cells                     | 3.42E-03 | ATM,CD47,JAK2,MCL1,RAF1,SELL,TNFSF13B                                                                                                                              | 7           |
| Cell Death and Survival, Cellular Compromise      | cytotoxicity of cells                            | 3.51E-03 | CALM1 (includes others),CD244,CD46,CD74,CFLAR,CYBB,GZMA,HLA-DRB1,IFNAR1,MICA,PTPRC,STAT1,TGFBR2                                                                    | 13          |
| Cell Death and Survival                           | killing of lymphocytes                           | 3.74E-03 | CD244,CD47,IFNAR1,IFNGR1,STAT1                                                                                                                                     | 5           |
| Cell Death and Survival                           | apoptosis of fibroblasts                         | 3.99E-03 | APAF1,ATM,CDC42,CFLAR,DDX58,EIF2AK2,EIF2S1,GZMA,MCL1,PRMT2,RAF1,SLK                                                                                                | 12          |
| Cell Death and Survival                           | cell death of fibroblasts                        | 4.36E-03 | APAF1,ATM,CDC42,CFLAR,DDX58,EIF2AK2,EIF2S1,EPHX1,GPX1,GZMA,MCL1,PRMT2,RAF1,SLK                                                                                     | 14          |
| Cell Death and Survival, Cell Signaling           | activation of caspase                            | 4.56E-03 | APAF1,CARD8,JAK2,MTCH1,STAT1,VCP                                                                                                                                   | 6           |
| Cancer, Cell Death and Survival, Tumor Morphology | cell viability of cancer cells                   | 4.64E-03 | CD74,HMGB1,MCL1,NFE2L2,PARP14,SELL,TNFSF13B                                                                                                                        | 7           |
| Cancer, Cell Death and Survival, Tumor Morphology | cell death of chronic lymphocytic leukemia cells | 4.68E-03 | ATM,CD47,SELL,TNFSF13B                                                                                                                                             | 4           |
| Cell Death and Survival                           | cytolysis of lymphoblastoid cell lines           | 4.70E-03 | CD244,MICA                                                                                                                                                         | 2           |
| Cell Death and Survival                           | loss of B lymphocytes                            | 4.70E-03 | CD74,SPPL2A                                                                                                                                                        | 2           |
| Cell Death and Survival                           | cell death of T lymphocytes                      | 5.03E-03 | APAF1,ATM,CD47,CDC42,CFLAR,CYLD,GZMA,IFNGR1,KLF13,MCL1,NFE2L2,NR3C1,PPP3R1,PTPRC,STAT1,TGFBR2                                                                      | 16          |
| Cancer, Cell Death and Survival, Tumor Morphology | cell viability of tumor cells                    | 5.07E-03 | CD74,HMGB1,LRRK2,MCL1,NFE2L2,PARP14,SELL,TNFSF13B                                                                                                                  | 8           |

| Categories                                                                                                                            | Diseases or Functions Annotation                     | p-Value  | Molecules                                                                                                                                                                                                                                                                          | # Molecules |
|---------------------------------------------------------------------------------------------------------------------------------------|------------------------------------------------------|----------|------------------------------------------------------------------------------------------------------------------------------------------------------------------------------------------------------------------------------------------------------------------------------------|-------------|
| Cell Death and Survival                                                                                                               | cell death of mononuclear leukocytes                 | 5.35E-03 | APAF1,ATM,CD47,CDC42,CFLAR,CYLD,EIF2AK2,FCER1A,GZMA,IFNGR1,KLF13,MCL1,NFE2L2,NR3C1,PPP3CB,PTPRC,STAT1,TGFBR2,TNFSF13B                                                                                                                                                              | 19          |
| Cell Death and Survival                                                                                                               | apoptosis of colon cancer cell lines                 | 5.39E-03 | APAF1,CCAR1,CDC42,CDKN1C,CFLAR,EPHB4,MCL1,RASSF3,SRI,STAT1,TMSB10/TMSB4X,VCP,YWHAE                                                                                                                                                                                                 | 13          |
| Cell Death and Survival                                                                                                               | cell death of phagocytes                             | 5.46E-03 | ANXA1,CFLAR,CYBB,EIF2AK2,FCER1A,HMGB1,IFNAR1,MCL1,NFE2L2,NR3C1,PTGER4,STAT1                                                                                                                                                                                                        | 12          |
| Cell Death and Survival                                                                                                               | apoptosis of myeloid cells                           | 5.60E-03 | ANXA1,CFLAR,CYBB,EIF2AK2,FCER1A,HMGB1,JAK2,MCL1,NFE2L2,RAF1,STAT1                                                                                                                                                                                                                  | 11          |
| Cell Death and Survival                                                                                                               | apoptosis of thymocytes                              | 6.47E-03 | ATM,CFLAR,CYLD,GZMA,KLF13,NFE2L2,NR3C1,PTPRC                                                                                                                                                                                                                                       | 8           |
| Cell Death and Survival                                                                                                               | apoptosis of kidney cell lines                       | 6.50E-03 | CFLAR,DAP3,EIF2AK2,JAK2,MCL1,NFE2L2,PPP3R1,PRMT2,RAD21,RAF1,RNF13,RNF31,SLK                                                                                                                                                                                                        | 13          |
| Cell Death and Survival                                                                                                               | necroptosis of tumor cell lines                      | 6.94E-03 | CYLD,STAT1                                                                                                                                                                                                                                                                         | 2           |
| Cell Death and Survival, DNA Replication, Recombination, and Repair                                                                   | fragmentation of DNA fragment                        | 7.93E-03 | APOBEC3B,EIF2AK2,GZMA,MTCH1,PPP1CC                                                                                                                                                                                                                                                 | 5           |
| Cell Death and Survival                                                                                                               | apoptosis of peritoneal macrophages                  | 8.07E-03 | CFLAR,MCL1,NFE2L2                                                                                                                                                                                                                                                                  | 3           |
| Cancer, Cell Death and Survival, Tumor Morphology                                                                                     | apoptosis of leukemia cells                          | 8.20E-03 | ATM,JAK2,MCL1,RAF1,SELL,TNFSF13B                                                                                                                                                                                                                                                   | 6           |
| Cell Death and Survival                                                                                                               | cell death of lymphocytes                            | 8.22E-03 | APAF1,ATM,CD47,CDC42,CFLAR,CYLD,EIF2AK2,GZMA,IFNGR1,KLF13,MCL1,NFE2L2,NR3C1,PPP3CB,PTPRC,STAT1,TGFBR2,TNFSF13B                                                                                                                                                                     | 18          |
| Cancer, Cell Death and Survival, Tumor Morphology                                                                                     | cell viability of chronic lymphocytic leukemia cells | 9.34E-03 | CD74,SELL,TNFSF13B                                                                                                                                                                                                                                                                 | 3           |
| Cell Death and Survival                                                                                                               | cell death of hematopoietic cells                    | 9.40E-03 | APAF1,ATM,CFLAR,CYLD,EIF2AK2,GZMA,KLF13,MCL1,NFE2L2,NR3C1,PTPRC,RAF1                                                                                                                                                                                                               | 12          |
| Cell Death and Survival, Cellular Compromise, Neurological Disease, Organismal Injury and Abnormalities, Tissue Morphology            | neurodegeneration of granule cells                   | 9.58E-03 | ATM,PRNP                                                                                                                                                                                                                                                                           | 2           |
| Cell Death and Survival                                                                                                               | apoptosis of epithelial cell lines                   | 9.98E-03 | CFLAR,DAP3,EIF2AK2,JAK2,MCL1,NFE2L2,PPP3R1,PRMT2,RAD21,RAF1,RNF31,TGFBR2                                                                                                                                                                                                           | 12          |
| Cell Death and Survival                                                                                                               | apoptosis of lymphoma cell lines                     | 1.05E-02 | CARD8,CFLAR,EIF2AK2,ERN1,FCER1A,IGFBP7,JAK2,MCL1,PTPRC,TNFSF13B                                                                                                                                                                                                                    | 10          |
| Cell-To-Cell Signaling and Interaction, Hematological System Development and Function, Immune Cell Trafficking, Inflammatory Response | activation of leukocytes                             | 6.10E-08 | ANXA1,ATM,BLOC1S6,CD244,CD36,CD46,CD47,CD58,CD74,CD86,CLEC7A,CTSS,CYBB,DDX58,ERAP1,FKBP1A,GZMA,HBP1,HLA-DMA,HLA-DMB,HLA-DQA1,HLA-DRB1,HMGB1,IFNAR1,JAK2,MGST1,MICA,NBR1,NDFIP1,NFE2L2,PELI1,PPP3CB,PRNP,PSMB8,PTGER4,PTPRC,RAB10,RAB32,RAB6A,RAB8B,SELE,SELL,STAT1,TGFBR2,TNFSF13B | 45          |

| Categories                                                                                                                            | Diseases or Functions Annotation       | p-Value  | Molecules                                                                                                                                                                                                                                                                                                                                   | # Molecules |
|---------------------------------------------------------------------------------------------------------------------------------------|----------------------------------------|----------|---------------------------------------------------------------------------------------------------------------------------------------------------------------------------------------------------------------------------------------------------------------------------------------------------------------------------------------------|-------------|
| Cell-To-Cell Signaling and Interaction, Hematological System Development and Function                                                 | activation of blood cells              | 1.61E-07 | ANXA1,ATM,BLOC1S6,CD244,CD36,CD46,CD47,CD58,CD74,CD86,CLEC7A,CTSS,CYBB,DDX58,ERAP1,FKBP1A,GZMA,HBP1,HLA-DMA,HLA-DMB,HLA-DQA1,HLA-DRB1,HMGB1,IFNAR1,JAK2,MGST1,MICA,NBR1,NDP1,NFE2L2,PEL1,PLEK,PPP3CB,PRNP,PSMB8,PTGER4,PTPRC,RAB10,RAB32,RAB6A,RAB8B,SELE,SELL,STAT1,TGFBR2,TNFSF13B                                                        | 46          |
| Cell-To-Cell Signaling and Interaction                                                                                                | activation of cells                    | 4.70E-07 | ANXA1,ATM,BLOC1S6,CD244,CD36,CD46,CD47,CD58,CD74,CD86,CLEC7A,CTSS,CYBB,CYLD,DDX58,EIF2AK2,ERAP1,ERN1,FCER1A,FKBP1A,FNTA,GPX1,GZMA,HBP1,HLA-DMA,HLA-DMB,HLA-DQA1,HLA-DRB1,HMGB1,IFNAR1,JAK2,MGST1,MICA,MTCH1,NBR1,NDP1,NFE2L2,PEL1,PLEK,PPP2CA,PPP3CB,PRNP,PSMB8,PTGER4,PTPRC,RAB10,RAB32,RAB6A,RAB8B,RICTOR,SELE,SELL,STAT1,TGFBR2,TNFSF13B | 55          |
| Cell-To-Cell Signaling and Interaction, Hematological System Development and Function, Immune Cell Trafficking, Inflammatory Response | activation of antigen presenting cells | 5.45E-07 | ATM,CD36,CD47,CD74,CD86,CLEC7A,CTSS,CYBB,ERAP1,HBP1,HLA-DMA,HLA-DMB,HLA-DQA1,HMGB1,IFNAR1,JAK2,PEL1,PRNP,PSMB8,PTGER4,RAB10,RAB32,RAB6A,RAB8B,STAT1                                                                                                                                                                                         | 25          |
| Antimicrobial Response, Cell-To-Cell Signaling and Interaction, Connective Tissue Development and Function, Inflammatory Response     | antiviral response of fibroblasts      | 1.08E-05 | DDX58,IFNAR1,STAT1                                                                                                                                                                                                                                                                                                                          | 3           |
| Cell-To-Cell Signaling and Interaction, Cellular Movement, Hematological System Development and Function, Immune Cell Trafficking     | recruitment of leukocytes              | 2.61E-05 | ANXA1,CD36,CD47,CD74,CLEC7A,DDX58,FCER1A,GLRX,HDC,HMGB1,IFNAR1,ITGA4,LRRK2,NFE2L2,PEL1,PRMT2,RAP1A,ROCK1,SELE,SELL,TGFBR2                                                                                                                                                                                                                   | 21          |
| Cell-To-Cell Signaling and Interaction, Tissue Development                                                                            | adhesion of blood cells                | 6.76E-05 | ANXA1,ANXA7,CD36,CD46,CD47,CD58,CD74,CDC42,CYBB,GALNT1,GLRX,HMGB1,IFNGR1,ITGA4,JAK2,PAFAH1B1,PTGER4,PTPRC,RICTOR,ROCK1,SELE,SELL,STAT1,TGFBR2                                                                                                                                                                                               | 24          |
| Cell-To-Cell Signaling and Interaction, Hematological System Development and Function, Immune Cell Trafficking, Tissue Development    | adhesion of immune cells               | 1.31E-04 | ANXA1,CD36,CD46,CD47,CD58,CD74,CDC42,GALNT1,GLRX,HMGB1,IFNGR1,ITGA4,JAK2,PAFAH1B1,PTGER4,PTPRC,RICTOR,ROCK1,SELE,SELL,STAT1,TGFBR2                                                                                                                                                                                                          | 22          |
| Cell-To-Cell Signaling and Interaction, Hematological System Development and Function, Immune Cell Trafficking, Inflammatory Response | activation of lymphocytes              | 1.39E-04 | ANXA1,BLOC1S6,CD244,CD46,CD47,CD58,CD74,CD86,CLEC7A,DDX58,GZMA,HLA-DRB1,HMGB1,IFNAR1,MGST1,MICA,NBR1,NDP1,NFE2L2,PEL1,PPP3CB,PRNP,PTPRC,STAT1,TGFBR2,TNFSF13B                                                                                                                                                                               | 26          |
| Cell-To-Cell Signaling and Interaction, Hematological System Development and Function, Immune Cell Trafficking, Tissue Development    | adhesion of mononuclear leukocytes     | 2.18E-04 | ANXA1,CD47,CD58,HMGB1,IFNGR1,ITGA4,JAK2,RICTOR,ROCK1,SELE,SELL,TGFBR2                                                                                                                                                                                                                                                                       | 12          |
| Cell-To-Cell Signaling and Interaction, Hematological System Development and Function, Immune Cell Trafficking, Inflammatory Response | activation of T lymphocytes            | 2.25E-04 | ANXA1,CD244,CD46,CD47,CD58,CD74,CD86,CLEC7A,DDX58,GZMA,HLA-DRB1,IFNAR1,MGST1,NBR1,NDP1,NFE2L2,PPP3CB,PRNP,PTPRC,STAT1,TGFBR2                                                                                                                                                                                                                | 21          |

| Categories                                                                                                                                                                           | Diseases or Functions Annotation                | p-Value  | Molecules                                                                                           | # Molecules |
|--------------------------------------------------------------------------------------------------------------------------------------------------------------------------------------|-------------------------------------------------|----------|-----------------------------------------------------------------------------------------------------|-------------|
| Cell-To-Cell Signaling and Interaction, Cell-mediated Immune Response, Cellular Movement, Hematological System Development and Function, Immune Cell Trafficking, Tissue Development | adhesion of T lymphocytes                       | 3.06E-04 | ANXA1,CD47,CD58,IFNGR1,ITGA4,JAK2,RICTOR,SELE,SELL                                                  | 9           |
| Cell-To-Cell Signaling and Interaction, Inflammatory Response                                                                                                                        | response of phagocytes                          | 3.84E-04 | ABCA7,ANXA1,CD36,CD47,CLEC7A,DDX58,ERN1,FCER1A,GLRX,HMGB1,IFNAR1,ITGA4,NR3C1,ZEB2                   | 14          |
| Cell-To-Cell Signaling and Interaction, Hematological System Development and Function, Immune Cell Trafficking, Tissue Development                                                   | adhesion of lymphocytes                         | 4.20E-04 | ANXA1,CD47,CD58,IFNGR1,ITGA4,JAK2,RICTOR,ROCK1,SELE,SELL                                            | 10          |
| Cell-To-Cell Signaling and Interaction, Cellular Function and Maintenance, Hematological System Development and Function, Inflammatory Response                                      | phagocytosis of granulocytes                    | 4.51E-04 | ANXA1,CD36,CD47,GLRX,HMGB1,IFNAR1                                                                   | 6           |
| Cell-To-Cell Signaling and Interaction, Connective Tissue Development and Function                                                                                                   | response of fibroblasts                         | 4.52E-04 | CD36,DDX58,IFNAR1,STAT1                                                                             | 4           |
| Cell-To-Cell Signaling and Interaction, Cellular Function and Maintenance, Hematological System Development and Function, Inflammatory Response                                      | phagocytosis of bone marrow-derived neutrophils | 4.91E-04 | CD47,HMGB1                                                                                          | 2           |
| Cardiovascular System Development and Function, Cell-To-Cell Signaling and Interaction, Tissue Development                                                                           | adhesion of endothelial cells                   | 5.03E-04 | ANXA7,CD36,CDC42,HMGB1,IGFBP7,ITGA4,RICTOR,SELE,SELL,TGFBR2,TMSB10/TMSB4X                           | 11          |
| Cell-To-Cell Signaling and Interaction                                                                                                                                               | response of myeloid cells                       | 5.49E-04 | ABCA7,ANXA1,CD36,CD47,DDX58,ERN1,FCER1A,GLRX,HMGB1,IFNAR1,ITGA4,NR3C1,PTPRC                         | 13          |
| Cell-To-Cell Signaling and Interaction, Hematological System Development and Function, Immune Cell Trafficking, Tissue Development                                                   | detachment of leukocytes                        | 8.24E-04 | ANXA1,PTPRC,SELL                                                                                    | 3           |
| Cell-To-Cell Signaling and Interaction, Inflammatory Response                                                                                                                        | immune response of leukocytes                   | 8.55E-04 | ABCA7,ANXA1,CD36,CD47,CD86,CTSS,DDX58,ERN1,FCER1A,GLRX,HMGB1,IFNAR1,IFNGR1,ITGA4,NR3C1,PTPRC,TGFBR2 | 17          |
| Cardiovascular System Development and Function, Cell-To-Cell Signaling and Interaction, Tissue Development                                                                           | adhesion of vascular endothelial cells          | 9.38E-04 | ANXA7,CD36,HMGB1,IGFBP7,ITGA4,RICTOR,SELE,TMSB10/TMSB4X                                             | 8           |

| Categories                                                                                                                                      | Diseases or Functions Annotation            | p-Value  | Molecules                                                             | # Molecules |
|-------------------------------------------------------------------------------------------------------------------------------------------------|---------------------------------------------|----------|-----------------------------------------------------------------------|-------------|
| Cell-To-Cell Signaling and Interaction, Inflammatory Response                                                                                   | immune response of phagocytes               | 1.30E-03 | ABCA7,ANXA1,CD36,CD47,DDX58,ERN1,FCER1A,GLRX,HMGB1,IFNAR1,ITGA4,NR3C1 | 12          |
| Cell-To-Cell Signaling and Interaction                                                                                                          | response of granulocytes                    | 1.33E-03 | ANXA1,CD36,CD47,FCER1A,GLRX,HMGB1,IFNAR1,ITGA4                        | 8           |
| Cell-To-Cell Signaling and Interaction, Hematological System Development and Function, Inflammatory Response                                    | immune response of neutrophils              | 1.37E-03 | CD36,CD47,FCER1A,GLRX,HMGB1,IFNAR1,ITGA4                              | 7           |
| Cell-To-Cell Signaling and Interaction                                                                                                          | response of antigen presenting cells        | 1.42E-03 | ABCA7,ANXA1,CD36,CD47,CLEC7A,CTSS,DDX58,ERN1,HMGB1,IFNAR1,NR3C1       | 11          |
| Cell-To-Cell Signaling and Interaction, Cellular Movement, Hematological System Development and Function, Immune Cell Trafficking               | recruitment of mononuclear leukocytes       | 1.80E-03 | CD47,DDX58,FCER1A,HDC,HMGB1,ITGA4,PELI1,SELE,SELL                     | 9           |
| Cell-To-Cell Signaling and Interaction, Inflammatory Response                                                                                   | immune response of antigen presenting cells | 2.03E-03 | ABCA7,ANXA1,CD36,CD47,CTSS,DDX58,ERN1,HMGB1,IFNAR1,NR3C1              | 10          |
| Cell-To-Cell Signaling and Interaction, Hematological System Development and Function                                                           | binding of B-lymphocyte derived cell lines  | 2.05E-03 | CD47,CRKL,ITGA4                                                       | 3           |
| Cell Cycle, Cell-To-Cell Signaling and Interaction, Cellular Growth and Proliferation                                                           | contact growth inhibition of leukocytes     | 2.05E-03 | HMGB1,IKZF1,PTPRC                                                     | 3           |
| Cell-To-Cell Signaling and Interaction, Cellular Function and Maintenance, Hematological System Development and Function, Inflammatory Response | phagocytosis of neutrophils                 | 2.53E-03 | CD36,CD47,GLRX,HMGB1,IFNAR1                                           | 5           |
| Cell-To-Cell Signaling and Interaction, Hematological System Development and Function, Immune Cell Trafficking, Tissue Development              | cell-cell adhesion of leukocytes            | 2.80E-03 | ITGA4,PTPRC,ROCK1,SELE                                                | 4           |
| Cardiovascular System Development and Function, Cell-To-Cell Signaling and Interaction, Tissue Development                                      | adhesion of HCAEC cells                     | 2.86E-03 | SELE,SELL                                                             | 2           |

| Categories                                                                                                                                                       | Diseases or Functions Annotation                       | p-Value  | Molecules                                                                          | # Molecules |
|------------------------------------------------------------------------------------------------------------------------------------------------------------------|--------------------------------------------------------|----------|------------------------------------------------------------------------------------|-------------|
| Cell-To-Cell Signaling and Interaction, Cellular Compromise, Tissue Development, Tumor Morphology                                                                | adhesion of acute myeloid leukemia blast cells         | 2.86E-03 | SELE,SELL                                                                          | 2           |
| Cell-To-Cell Signaling and Interaction, Nervous System Development and Function                                                                                  | afterhyperpolarization of central nervous system cells | 2.86E-03 | ATP2B4,LMO4                                                                        | 2           |
| Cell-To-Cell Signaling and Interaction, Cellular Movement, Hematological System Development and Function, Immune Cell Trafficking, Tissue Development            | detachment of phagocytes                               | 2.86E-03 | ANXA1,PTPRC                                                                        | 2           |
| Cell-To-Cell Signaling and Interaction, Cell-mediated Immune Response, Cellular Movement, Hematological System Development and Function, Immune Cell Trafficking | recruitment of CD8+ T lymphocyte                       | 2.86E-03 | DDX58,PELI1                                                                        | 2           |
| Cell Cycle, Cell-To-Cell Signaling and Interaction, Cellular Growth and Proliferation                                                                            | contact growth inhibition                              | 3.09E-03 | CDC42,GBP2,HMGB1,IKZF1,ING4,JAK2,PTPRC,RAF1,RBL2,STAT1                             | 10          |
| Cell-To-Cell Signaling and Interaction, Hematological System Development and Function, Immune Cell Trafficking, Infectious Disease, Tissue Development           | fusion of leukocytes                                   | 3.21E-03 | CD36,CD46,CD47,STAT1                                                               | 4           |
| Cell-To-Cell Signaling and Interaction, Inflammatory Response                                                                                                    | response of macrophages                                | 3.89E-03 | ABCA7,ANXA1,CD36,CD47,CLEC7A,DDX58,ERN1,HMGB1,NR3C1                                | 9           |
| Cell-To-Cell Signaling and Interaction, Cellular Function and Maintenance, Inflammatory Response                                                                 | phagocytosis of cells                                  | 4.10E-03 | ABCA7,ANXA1,CD302,CD36,CD47,CDC42,CLEC7A,CLTC,DNTTIP1,GLRX,HMGB1,IFNAR1,LY75,NR3C1 | 14          |
| Cell-To-Cell Signaling and Interaction                                                                                                                           | binding of blood cells                                 | 4.16E-03 | CD47,CD58,CD86,HLA-DMA,HMGB1,IFNGR1,ITGA4,JAK2,NFE2L2,PTPRC,RAP1B,SELE,SELL        | 13          |
| Cell-To-Cell Signaling and Interaction, Hematological System Development and Function, Tissue Development                                                        | binding of T lymphocytes                               | 4.25E-03 | CD47,CD58,CD86,HLA-DMA,IFNGR1,ITGA4                                                | 6           |



| Categories                                                                                                                                                       | Diseases or Functions Annotation                 | p-Value  | Molecules                                              | # Molecules |
|------------------------------------------------------------------------------------------------------------------------------------------------------------------|--------------------------------------------------|----------|--------------------------------------------------------|-------------|
| Cell-To-Cell Signaling and Interaction, Hematological System Development and Function, Immune Cell Trafficking, Inflammatory Response, Tissue Development        | adhesion of monocytes                            | 4.49E-03 | HMGB1,ROCK1,SELE,SELL,TGFBR2                           | 5           |
| Cell-To-Cell Signaling and Interaction, Cell-mediated Immune Response, Cellular Movement, Hematological System Development and Function, Immune Cell Trafficking | recruitment of T lymphocytes                     | 4.56E-03 | CD47,DDX58,FCER1A,HDC,PELI1,SELE                       | 6           |
| Cell-To-Cell Signaling and Interaction, Nervous System Development and Function                                                                                  | afterhyperpolarization of neurons                | 4.70E-03 | ATP2B4,LMO4                                            | 2           |
| Cell Cycle, Cell-To-Cell Signaling and Interaction, Cellular Growth and Proliferation                                                                            | contact growth inhibition of melanoma cell lines | 4.70E-03 | RAF1,STAT1                                             | 2           |
| Cell-To-Cell Signaling and Interaction, Cellular Growth and Proliferation, Hematological System Development and Function                                         | suppression of effector T lymphocytes            | 4.70E-03 | CD46,CD86                                              | 2           |
| Cell-To-Cell Signaling and Interaction, Hematological System Development and Function                                                                            | binding of mononuclear leukocytes                | 5.07E-03 | CD47,CD58,CD86,HLA-DMA,IFNGR1,ITGA4,SELE,SELL          | 8           |
| Cell-To-Cell Signaling and Interaction, Hematological System Development and Function                                                                            | binding of lymphocytes                           | 5.22E-03 | CD47,CD58,CD86,HLA-DMA,IFNGR1,ITGA4,SELL               | 7           |
| Cell-To-Cell Signaling and Interaction, Cellular Movement, Hematological System Development and Function, Immune Cell Trafficking                                | recruitment of lymphocytes                       | 5.52E-03 | CD47,DDX58,FCER1A,HDC,PELI1,SELE,SELL                  | 7           |
| Cell-To-Cell Signaling and Interaction, Hematological System Development and Function, Immune Cell Trafficking, Inflammatory Response, Tissue Development        | adhesion of phagocytes                           | 5.85E-03 | ANXA1,GLRX,HMGB1,ITGA4,PAFAH1B1,ROCK1,SELE,SELL,TGFBR2 | 9           |
| Cell-To-Cell Signaling and Interaction, Hematological System Development and Function, Hematopoiesis                                                             | binding of hematopoietic progenitor cells        | 5.85E-03 | CD47,ITGA4,RAP1B                                       | 3           |

| Categories                                                                                                                                                                           | Diseases or Functions Annotation                 | p-Value  | Molecules                                                                                            | # Molecules |
|--------------------------------------------------------------------------------------------------------------------------------------------------------------------------------------|--------------------------------------------------|----------|------------------------------------------------------------------------------------------------------|-------------|
| Cell-To-Cell Signaling and Interaction                                                                                                                                               | binding of leukemia cell lines                   | 6.81E-03 | CD36,CD47,ITGA4,JAK2,SELL                                                                            | 5           |
| Cell-To-Cell Signaling and Interaction                                                                                                                                               | binding of bone marrow cell lines                | 6.90E-03 | CRKL,ITGA4,RAF1                                                                                      | 3           |
| Cell-To-Cell Signaling and Interaction, Cell-mediated Immune Response, Cellular Movement, Hematological System Development and Function, Immune Cell Trafficking, Tissue Development | adhesion of Th1 cells                            | 6.94E-03 | ITGA4,SELE                                                                                           | 2           |
| Antigen Presentation, Cell-To-Cell Signaling and Interaction, Inflammatory Response                                                                                                  | antigen presentation of antigen presenting cells | 6.94E-03 | CTSS,IFNAR1                                                                                          | 2           |
| Cell-To-Cell Signaling and Interaction, Hematological System Development and Function, Immune Cell Trafficking, Tissue Development                                                   | detachment of myeloid cells                      | 6.94E-03 | ANXA1,PTPRC                                                                                          | 2           |
| Cell-To-Cell Signaling and Interaction, Inflammatory Response                                                                                                                        | response of mast cells                           | 6.94E-03 | FCER1A,ZEB2                                                                                          | 2           |
| Cell-To-Cell Signaling and Interaction, Inflammatory Response                                                                                                                        | immune response of macrophages                   | 7.11E-03 | ABCA7,ANXA1,CD36,CD47,DDX58,ERN1,HMGB1,NR3C1                                                         | 8           |
| Cell-To-Cell Signaling and Interaction                                                                                                                                               | recognition of cells                             | 7.26E-03 | CD36,CD47,CLEC7A,MICA                                                                                | 4           |
| Cell-To-Cell Signaling and Interaction, Hematological System Development and Function, Immune Cell Trafficking, Inflammatory Response                                                | activation of phagocytes                         | 7.34E-03 | ANXA1,ATM,CD36,CD47,CD86,CLEC7A,CYBB,FKBP1A,GZMA,HMGB1,IFNAR1,JAK2,PELI1,PRNP,PTGER4,SELE,SELL,STAT1 | 18          |
| Cell-To-Cell Signaling and Interaction, Hematological System Development and Function, Humoral Immune Response                                                                       | binding of B lymphocytes                         | 8.07E-03 | CD47,CD86,ITGA4                                                                                      | 3           |
| Cardiovascular System Development and Function, Cell-To-Cell Signaling and Interaction, Tissue Development                                                                           | adhesion of postcapillary venule                 | 9.58E-03 | CD74,SELL                                                                                            | 2           |
| Cell Cycle, Cell-To-Cell Signaling and Interaction, Cellular Growth and Proliferation                                                                                                | contact growth inhibition of lymphocytes         | 9.58E-03 | IKZF1,PTPRC                                                                                          | 2           |

| Categories                                                                                       | Diseases or Functions Annotation | p-Value  | Molecules                                     | # Molecules |
|--------------------------------------------------------------------------------------------------|----------------------------------|----------|-----------------------------------------------|-------------|
| Cell-To-Cell Signaling and Interaction, Cellular Function and Maintenance, Inflammatory Response | phagocytosis of blood cells      | 1.06E-02 | ABCA7,ANXA1,CD36,CD47,CDC42,GLRX,HMGB1,IFNAR1 | 8           |
| Cell-To-Cell Signaling and Interaction, Cellular Function and Maintenance, Inflammatory Response | phagocytosis of phagocytes       | 1.14E-02 | ABCA7,ANXA1,CD36,CD47,GLRX,HMGB1,IFNAR1       | 7           |
| Cell-To-Cell Signaling and Interaction                                                           | fusion of cells                  | 1.15E-02 | ANXA1,CD36,CD46,CD47,IFRD1,ROCK1,STAT1,UBE2B  | 8           |
