# Supplementary material for: Intracerebral Hemorrhage and Ischemic Stroke of Different Etiologies Have Distinct Alternatively Spliced mRNA Profiles in the Blood: a Pilot RNA-seq Study
Source: PubMed Central journal article supplement (PMC4485700; doi:10.1007/s12975-015-0407-9), 2015-05-22
Supplement: 12975_2015_407_MOESM7_ESM.pdf [file 12975_2015_407_MOESM7_ESM.pdf]

**SUPPLEMENTARY TABLE 7. Differential Exon Usage in the 5 Groups (p < 0.005, FC > |1.2|). FC-Fold Change**

| Upregulated in CE IS            |             |                        |               |                   |       |                  |               |                       |               |
|---------------------------------|-------------|------------------------|---------------|-------------------|-------|------------------|---------------|-----------------------|---------------|
| Marker ID                       | Gene Symbol | CE Stroke vs. Controls |               | CE Stroke vs. ICH |       | CE Stroke vs. LV |               | CE Stroke vs. Lacunar |               |
|                                 |             | p-value                | FC            | p-value           | FC    | p-value          | FC            | p-value               | FC            |
| chr1.86861716-86861978>ODF2L    | ODF2L       | 4.89E-04               | 32.54         | 8.33E-02          | 1.68  | 4.39E-04         | 52.79         | 4.15E-04              | 77.95         |
| chr10.38299602-38299711>ZNF33A  | ZNF33A      | 1.34E-03               | 8.75          | 4.81E-04          | >500  | 3.54E-03         | 4.52          | 4.80E-04              | Not Estimable |
| chr10.38299604-38299711>ZNF33A  | ZNF33A      | 1.34E-03               | 8.75          | 4.81E-04          | >500  | 3.54E-03         | 4.52          | 4.80E-04              | Not Estimable |
| chr10.49253461-49254183>BMS1P7  | BMS1P7      | 3.00E-04               | 11.83         | 1.29E-04          | >500  | 2.16E-03         | 3.62          | 5.90E-04              | 6.62          |
| chr14.70242552-70243105>SLC10A1 | SLC10A1     | 3.87E-04               | Not Estimable | 1.52E-02          | 2.52  | 4.05E-03         | 3.93          | 7.65E-03              | 3.10          |
| chr17.34856670-34856799>MYO19   | MYO19       | 6.48E-04               | 7.89          | 2.45E-03          | 3.85  | 1.19E-03         | 5.32          | 4.55E-04              | 11.01         |
| chr17.73000302-73002233>CDR2L   | CDR2L       | 1.76E-05               | 10.40         | 1.03E-05          | 19.45 | 1.19E-05         | 15.70         | 2.54E-05              | 7.93          |
| chr19.18959976-18960255>UPF1    | UPF1        | 6.28E-04               | 4.27          | 8.00E-05          | 21.25 | 4.87E-05         | Not Estimable | 9.17E-05              | 16.73         |

|                                         |                   |          |               |          |       |          |       |          |        |
|-----------------------------------------|-------------------|----------|---------------|----------|-------|----------|-------|----------|--------|
| chr19.58427747-58427959>ZNF417andZNF814 | ZNF417 and ZNF814 | 4.40E-04 | 4.45          | 3.91E-02 | 1.64  | 5.11E-05 | 31.22 | 4.31E-05 | 62.20  |
| chr19.58427747-58427960>ZNF417andZNF814 | ZNF417 and ZNF814 | 4.40E-04 | 4.45          | 3.91E-02 | 1.64  | 5.11E-05 | 31.22 | 4.31E-05 | 62.20  |
| chr2.119988299-119988610>STEAP3         | STEAP3            | 4.66E-04 | 199.47        | 1.78E-03 | 6.53  | 4.46E-04 | >500  | 5.08E-04 | 68.51  |
| chr2.179463448-179463831>CCDC141andTTN  | CCDC141 and TTN   | 4.17E-06 | 56.83         | 5.56E-05 | 4.49  | 3.38E-06 | >500  | 3.38E-06 | >500   |
| chr2.25258142-25260098>LOC729723        | LOC729723         | 1.67E-03 | 4.92          | 4.83E-04 | 13.26 | 6.86E-04 | 8.95  | 5.62E-04 | 10.97  |
| chr20.43995515-43996064>SYS1-DBNDD2     | SYS1-DBNDD2       | 1.17E-02 | 9.29          | 9.88E-02 | 2.21  | 2.68E-02 | -1.76 | 3.16E-02 | 3.81   |
| chr22.19115606-19115962>skatee          | skatee            | 1.69E-02 | 1.83          | 6.02E-04 | 3.72  | 5.45E-05 | 16.63 | 2.53E-04 | 5.12   |
| chr3.188326949-188327339>LPP            | LPP               | 1.18E-03 | 9.73          | 6.73E-04 | 24.42 | 5.40E-04 | 61.39 | 4.89E-04 | 196.57 |
| chr3.48456585-48456756>PLXNB1           | PLXNB1            | 1.81E-05 | Not Estimable | 3.29E-04 | 4.01  | 1.81E-05 | >500  | 7.19E-04 | 3.20   |

|                                    |           |          |               |          |       |          |       |          |       |
|------------------------------------|-----------|----------|---------------|----------|-------|----------|-------|----------|-------|
| chr3.49448633-49449166>myforbo     | myforbo   | 3.99E-04 | 5.56          | 2.06E-04 | 8.39  | 8.58E-02 | 1.50  | 1.01E-04 | 19.14 |
| chr4.15570247-15570813>klawgu      | klawgu    | 3.67E-04 | 7.05          | 8.78E-03 | 2.30  | 6.85E-02 | 1.58  | 5.41E-04 | 5.61  |
| chr6.37225553-37225749>TBC1D22B    | TBC1D22B  | 2.24E-01 | 1.22          | 2.12E-02 | 1.59  | 1.12E-01 | -1.24 | 7.61E-04 | 2.56  |
| chr7.142630429-142630905>TRPV5     | TRPV5     | 1.01E-03 | 4.98          | 4.08E-03 | 2.99  | 1.34E-04 | >500  | 1.68E-04 | 42.44 |
| chr7.158334118-158334468>PTPRN2    | PTPRN2    | 1.50E-04 | Not Estimable | 2.64E-04 | 17.40 | 3.29E-03 | 3.27  | 2.01E-04 | 33.34 |
| chr8.104406853-104407319>shuskeebu | shuskeebu | 9.62E-05 | 18.92         | 4.82E-03 | 2.47  | 2.53E-04 | 7.00  | 1.48E-03 | 3.32  |

**Upregulated in LV IS**

| Marker ID                                     | Gene Symbol       | CE Stroke vs. LV |       | Controls vs. LV |       | ICH vs. LV |       | LV vs. Lacunar |       |
|-----------------------------------------------|-------------------|------------------|-------|-----------------|-------|------------|-------|----------------|-------|
|                                               |                   | p-value          | FC    | p-value         | FC    | p-value    | FC    | p-value        | FC    |
| chr1.214836934-214837426>CENPF                | CENPF             | 5.00E-04         | -3.69 | 5.93E-02        | -1.51 | 1.21E-03   | -2.91 | 1.98E-04       | 5.17  |
| chr10.46918169-46918362>FAM35B and RHEBP1 BP1 | FAM35B and RHEBP1 | 1.26E-02         | -2.69 | 2.31E-03        | -5.33 | 4.16E-04   | <-500 | 7.30E-04       | 16.07 |

|                                        |                |          |         |          |         |          |         |          |       |
|----------------------------------------|----------------|----------|---------|----------|---------|----------|---------|----------|-------|
| chr11.62389338-62389648>B3GAT3         | B3GAT3         | 2.98E-04 | -184.49 | 1.74E-03 | -5.23   | 1.16E-02 | -2.57   | 3.51E-03 | 3.78  |
| chr12.54645834-54646011>CBX5           | CBX5           | 4.19E-04 | -9.67   | 1.51E-04 | <-500   | 1.53E-04 | <-500   | 7.79E-04 | 6.06  |
| chr12.56334947-56335109>DGKA           | DGKA           | 3.08E-02 | -2.03   | 3.68E-03 | -3.73   | 4.70E-04 | -19.19  | 9.49E-04 | 7.91  |
| chr13.103506107-103506222>BIVMandERCC5 | BIVM and ERCC5 | 3.55E-07 | -8.46   | 1.47E-07 | -18.25  | 7.87E-08 | -119.86 | 1.72E-07 | 15.06 |
| chr14.53248502-53248629>GNPNAT1        | GNPNAT1        | 3.32E-03 | -3.53   | 2.07E-04 | <-500   | 4.12E-04 | -13.92  | 4.11E-02 | 1.85  |
| chr15.101847418-101849508>PCSK6        | PCSK6          | 2.64E-05 | -9.47   | 1.70E-04 | -3.93   | 1.94E-03 | -2.29   | 1.42E-05 | 18.68 |
| chr15.81584265-81585378>IL16           | IL16           | 4.03E-04 | -7.21   | 1.56E-02 | -2.08   | 1.94E-03 | -3.49   | 1.93E-04 | 14.76 |
| chr16.4475881-4476093>DNAJA3           | DNAJA3         | 4.39E-04 | -9.19   | 2.89E-01 | -1.28   | 2.48E-02 | -1.98   | 3.13E-03 | 3.32  |
| chr16.72146312-72146549>DHX38          | DHX38          | 3.43E-04 | <-500   | 3.58E-04 | -207.50 | 6.13E-04 | -15.82  | 3.43E-04 | >500  |
| chr17.43002077-43003867>KIF18B         | KIF18B         | 7.66E-04 | -4.84   | 4.20E-04 | -6.67   | 3.80E-02 | -1.75   | 2.95E-03 | 3.02  |

|                                       |                 |          |         |          |               |          |         |          |               |
|---------------------------------------|-----------------|----------|---------|----------|---------------|----------|---------|----------|---------------|
| chr2.173420100-173420447>PDK1         | PDK1            | 5.32E-04 | -8.27   | 6.79E-03 | -2.69         | 2.85E-03 | -3.49   | 3.74E-04 | 11.68         |
| chr2.20756227-20757428>dawgorbu       | dawgorbu        | 5.41E-04 | -3.87   | 2.90E-05 | Not Estimable | 2.42E-04 | -5.27   | 1.12E-04 | 8.19          |
| chr20.33056659-33057236>vytaw         | vytaw           | 3.05E-04 | -11.22  | 2.33E-03 | -3.50         | 7.30E-04 | -5.73   | 1.25E-04 | Not Estimable |
| chr20.43995515-43996064>SYS1-DBNDD2   | SYS1-DBNDD2     | 2.68E-02 | -1.76   | 8.54E-05 | -16.38        | 7.51E-04 | -3.90   | 2.23E-04 | 6.72          |
| chr20.52560545-52561535>BCAS1         | BCAS1           | 1.65E-04 | -247.51 | 3.31E-03 | -3.31         | 6.66E-04 | -6.90   | 3.85E-04 | 11.11         |
| chr22.18613610-18614498>PEX26andTUBA8 | PEX26 and TUBA8 | 1.36E-02 | -2.14   | 3.42E-04 | -8.12         | 9.20E-04 | -4.61   | 7.57E-02 | 1.57          |
| chr22.29141852-29141989>HSCB          | HSCB            | 4.31E-03 | -3.84   | 9.81E-03 | -2.87         | 4.12E-04 | -167.51 | 2.88E-03 | 4.61          |
| chr3.49448633-49449166>myforbo        | myforbo         | 8.58E-02 | 1.50    | 1.68E-02 | -3.71         | 8.50E-03 | -5.60   | 3.98E-03 | 12.77         |
| chr3.8606070-8609805>LMCD1            | LMCD1           | 6.35E-03 | -3.28   | 2.63E-03 | -4.75         | 1.48E-03 | -6.74   | 3.77E-04 | Not Estimable |

|                                 |          |          |        |          |               |          |         |          |       |
|---------------------------------|----------|----------|--------|----------|---------------|----------|---------|----------|-------|
| chr4.15570247-15570813>klawgu   | klawgu   | 6.85E-02 | 1.58   | 1.98E-02 | -4.45         | 3.12E-01 | -1.45   | 2.90E-02 | 3.54  |
| chr5.162902464-162902678>HMMR   | HMMR     | 2.07E-04 | <-500  | 1.05E-03 | -5.96         | 1.57E-03 | -4.80   | 4.74E-03 | 3.13  |
| chr5.176715528-176715926>NSD1   | NSD1     | 3.78E-04 | -8.90  | 1.22E-04 | Not Estimable | 1.01E-03 | -4.81   | 3.10E-04 | 10.77 |
| chr5.61688639-61688817>DIMT1L   | DIMT1L   | 1.15E-03 | -4.55  | 2.66E-04 | -12.85        | 5.61E-03 | -2.70   | 1.79E-04 | 26.01 |
| chr6.100023529-100023947>RPS3P5 | RPS3P5   | 6.84E-05 | -7.70  | 2.96E-05 | -17.42        | 1.92E-04 | -4.63   | 4.47E-05 | 10.72 |
| chr6.111619174-111619773>slyjey | slyjey   | 6.80E-05 | -6.99  | 4.07E-04 | -3.47         | 1.65E-02 | -1.74   | 2.30E-05 | 19.83 |
| chr6.37225553-37225749>TBC1D22B | TBC1D22B | 1.12E-01 | -1.24  | 9.78E-03 | -1.52         | 6.80E-04 | -1.98   | 2.94E-05 | 3.18  |
| chr7.2282560-2282683>NUDT1      | NUDT1    | 5.87E-04 | -3.95  | 3.45E-05 | Not Estimable | 3.70E-05 | -150.96 | 1.65E-04 | 7.00  |
| chr8.90798887-90799401>RIPK2    | RIPK2    | 1.00E-04 | -18.86 | 1.65E-04 | -10.01        | 3.30E-02 | -1.74   | 4.32E-04 | 5.31  |

| chr9.131486273-131486409>ZDHHC12 | ZDHHC12     | 1.41E-05              | -6.54  | 2.13E-05             | -5.43   | 5.90E-06        | -11.68  | 8.83E-06       | 8.53   |
|----------------------------------|-------------|-----------------------|--------|----------------------|---------|-----------------|---------|----------------|--------|
| chrX.152226503-152227128>PNMA3   | PNMA3       | 3.13E-03              | -4.43  | 4.20E-04             | -126.98 | 5.52E-04        | -26.32  | 1.74E-03       | 6.14   |
| <b>Upregulated in Lacunar IS</b> |             |                       |        |                      |         |                 |         |                |        |
| Marker ID                        | Gene Symbol | CE Stroke vs. Lacunar |        | Controls vs. Lacunar |         | ICH vs. Lacunar |         | LV vs. Lacunar |        |
|                                  |             | p-value               | FC     | p-value              | FC      | p-value         | FC      | p-value        | FC     |
| chr1.155691308-155691471>DAP3    | DAP3        | 1.44E-03              | -5.83  | 1.51E-02             | -2.40   | 4.78E-04        | -18.04  | 9.64E-04       | -7.72  |
| chr1.160580214-160580588>SLAMF1  | SLAMF1      | 9.00E-05              | -50.28 | 6.08E-04             | -4.99   | 8.40E-05        | -75.82  | 1.30E-04       | -17.92 |
| chr1.246729640-246730091>CNST    | CNST        | 1.49E-04              | <-500  | 1.49E-04             | <-500   | 5.30E-04        | -7.83   | 1.12E-02       | -2.35  |
| chr11.119039480-119040011>NLRX1  | NLRX1       | 2.47E-03              | -4.13  | 8.08E-04             | -7.84   | 5.40E-04        | -11.67  | 3.97E-04       | -18.66 |
| chr11.62475067-62475387>GNG3     | GNG3        | 2.61E-02              | -2.07  | 2.51E-04             | <-500   | 8.27E-03        | -2.76   | 6.18E-04       | -10.50 |
| chr12.111065735-111066029>TCTN1  | TCTN1       | 2.36E-04              | <-500  | 5.53E-04             | -11.15  | 2.41E-04        | -407.21 | 2.36E-04       | <-500  |
| chr12.123262038-123262230>CCDC62 | CCDC62      | 7.34E-03              | -3.02  | 6.85E-04             | -12.40  | 1.61E-03        | -5.83   | 4.55E-04       | -27.30 |

|                                   |           |          |        |          |               |          |        |          |               |
|-----------------------------------|-----------|----------|--------|----------|---------------|----------|--------|----------|---------------|
| chr12.2966630-2968829>FOX M1      | FOX M1    | 4.11E-04 | -4.71  | 9.88E-04 | -3.47         | 2.51E-03 | -2.72  | 1.60E-04 | -7.77         |
| chr12.94914730-94915694>LOC400061 | LOC400061 | 8.26E-04 | -2.46  | 2.57E-01 | -1.20         | 1.49E-05 | -9.38  | 4.11E-06 | Not Estimable |
| chr14.96795821-96795971>ATG2B     | ATG2B     | 1.42E-04 | -4.39  | 5.92E-04 | -2.96         | 1.69E-02 | -1.70  | 6.23E-05 | -6.19         |
| chr15.52970203-52970319>KIAA1370  | KIAA1370  | 7.48E-02 | -1.68  | 2.15E-02 | -2.19         | 2.45E-03 | -4.32  | 2.70E-04 | <-500         |
| chr16.15013757-15013940>zoner     | zoner     | 8.81E-03 | -2.19  | 3.72E-02 | -1.70         | 2.46E-03 | -2.90  | 5.61E-05 | Not Estimable |
| chr18.33077683-33077895>INO80C    | INO80C    | 1.26E-03 | -4.39  | 3.20E-04 | -10.51        | 6.38E-02 | -1.64  | 2.82E-03 | -3.28         |
| chr19.35173682-35173954>ZNF302    | ZNF302    | 5.42E-04 | -24.66 | 7.08E-04 | -14.32        | 4.23E-04 | -74.20 | 4.45E-04 | -52.73        |
| chr2.101627502-101628002>TBC1D8   | TBC1D8    | 2.60E-04 | -13.65 | 1.09E-03 | -4.69         | 1.25E-04 | <-500  | 3.07E-04 | -11.16        |
| chr2.160143094-160143317>WDSUB1   | WDSUB1    | 1.02E-03 | -8.14  | 3.24E-04 | Not Estimable | 6.23E-03 | -3.18  | 2.45E-03 | -4.63         |



|                                      |                |          |               |          |        |          |        |          |          |
|--------------------------------------|----------------|----------|---------------|----------|--------|----------|--------|----------|----------|
| chr2.29258330-29258510>FAM179A       | FAM179A        | 2.28E-05 | <-500         | 7.40E-05 | -9.36  | 5.57E-05 | -12.23 | 4.93E-03 | -2.20    |
| chr20.32079185-32079982>spawvor      | spawvor        | 1.44E-05 | Not Estimable | 1.47E-04 | -5.01  | 3.41E-04 | -3.73  | 6.92E-05 | -7.31    |
| chr21.47706315-47706712>C21orf57     | C21orf57       | 3.23E-05 | -21.91        | 9.74E-05 | -7.03  | 1.42E-04 | -5.74  | 1.96E-05 | -2028.81 |
| chr22.24316496-24316679>GSTTP1andDDT | GSTTP1 and DDT | 4.42E-03 | -3.29         | 7.91E-04 | -7.77  | 9.06E-02 | -1.60  | 4.00E-04 | -17.20   |
| chr22.44514918-44515020>PARVB        | PARVB          | 3.20E-03 | -3.27         | 6.91E-04 | -6.35  | 4.81E-02 | -1.74  | 2.99E-04 | -13.44   |
| chr5.156821041-156822687>ADAM19      | ADAM19         | 3.01E-04 | -16.01        | 2.15E-02 | -2.06  | 1.13E-03 | -5.14  | 2.42E-03 | -3.71    |
| chr6.146285293-146285525>SHPRH       | SHPRH          | 8.44E-04 | -4.84         | 3.55E-04 | -8.05  | 4.01E-02 | -1.75  | 2.61E-04 | -10.55   |
| chr6.146285293-146285559>SHPRH       | SHPRH          | 8.44E-04 | -4.84         | 3.55E-04 | -8.05  | 4.01E-02 | -1.75  | 2.61E-04 | -10.55   |
| chr6.163984476-163984751>QKI         | QKI            | 3.99E-07 | -5.23         | 6.22E-08 | -15.32 | 7.43E-07 | -4.34  | 2.09E-07 | -6.72    |

|                                  |           |          |       |          |               |          |        |          |        |
|----------------------------------|-----------|----------|-------|----------|---------------|----------|--------|----------|--------|
| chr6.168370462-168372588>MLLT4   | MLLT4     | 7.37E-03 | -2.24 | 9.05E-04 | -3.79         | 2.40E-03 | -2.86  | 4.22E-04 | -5.10  |
| chr6.30610545-30612432>C6orf134  | C6orf134  | 3.16E-04 | -5.69 | 1.56E-04 | -8.92         | 5.98E-04 | -4.30  | 1.39E-02 | -1.97  |
| chr7.99674926-99675056>ZNF3      | ZNF3      | 6.70E-04 | -6.08 | 4.74E-04 | -7.65         | 9.91E-03 | -2.37  | 2.97E-04 | -11.79 |
| chr8.10340434-10340741>LOC346702 | LOC346702 | 5.43E-05 | -6.06 | 1.95E-05 | -12.38        | 7.60E-06 | <-500  | 1.33E-05 | -20.57 |
| chr9.46687439-46688197>KGFLP1    | KGFLP1    | 1.22E-05 | <-500 | 1.22E-05 | <-500         | 1.22E-05 | <-500  | 3.46E-05 | -10.97 |
| chrX.40495835-40495964>CXorf38   | CXorf38   | 1.50E-03 | -7.97 | 4.89E-04 | Not Estimable | 5.85E-04 | -49.12 | 5.41E-04 | -86.98 |

**Upregulated in ICH**

| Marker ID                            | Gene Symbol     | CE Stroke vs. ICH |       | Controls vs. ICH |       | ICH vs. LV |       | ICH vs. Lacunar |       |
|--------------------------------------|-----------------|-------------------|-------|------------------|-------|------------|-------|-----------------|-------|
|                                      |                 | p-value           | FC    | p-value          | FC    | p-value    | FC    | p-value         | FC    |
| chr1.10509776-10510379>APITD1andCORT | APITD1 and CORT | 7.04E-04          | -4.22 | 4.26E-04         | -5.20 | 1.17E-04   | 13.61 | 8.89E-05        | 20.93 |
| chr1.112991564-112991794>CTTNBP2NL   | CTTNBP2NL       | 2.49E-02          | -1.96 | 7.67E-03         | -2.53 | 4.28E-04   | 8.64  | 3.22E-03        | 3.21  |

|                                                |                           |          |               |          |       |          |       |          |       |
|------------------------------------------------|---------------------------|----------|---------------|----------|-------|----------|-------|----------|-------|
| chr1.114499947-114500540>wawleybo              | wawleybo                  | 1.41E-01 | -1.44         | 1.46E-03 | -4.21 | 3.22E-04 | 11.02 | 8.68E-04 | 5.33  |
| chr1.145509166-145509612>RBM8A.1               | RBM8A.1                   | 1.52E-03 | -4.05         | 2.57E-03 | -3.37 | 4.91E-04 | 7.24  | 3.48E-04 | 9.57  |
| chr1.145790974-145791170>GPR89A                | GPR89A                    | 2.08E-04 | -9.88         | 1.17E-02 | -2.13 | 3.99E-02 | 1.71  | 1.49E-03 | 3.53  |
| chr1.150778337-150778492>CTSK                  | CTSK                      | 6.96E-06 | -2.75         | 1.17E-06 | -3.85 | 5.52E-03 | 1.44  | 1.17E-04 | 1.96  |
| chr1.150939858-150940190>LASS2                 | LASS2                     | 3.59E-05 | -8.01         | 6.54E-05 | -5.76 | 9.12E-04 | 2.65  | 1.47E-04 | 4.20  |
| chr1.154928545-154928780>SHC1andPYGO2andPBXIP1 | SHC1 and PYGO2 and PBXIP1 | 3.65E-04 | Not Estimable | 1.55E-03 | -6.39 | 4.42E-03 | 3.72  | 1.44E-02 | 2.53  |
| chr1.161196029-161196394>TOMM40L               | TOMM40L                   | 1.18E-02 | -2.53         | 9.42E-04 | -7.43 | 2.63E-04 | >500  | 6.66E-04 | 10.15 |
| chr1.168262382-168262516>SFT2D2andTBX1         | SFT2D2 and TBX19          | 1.10E-03 | -3.16         | 5.90E-03 | -2.19 | 4.08E-04 | 4.29  | 1.13E-04 | 8.20  |

|                                  |         |          |        |          |               |          |       |          |      |
|----------------------------------|---------|----------|--------|----------|---------------|----------|-------|----------|------|
| chr1.17056-17742>WASH7P          | WASH7P  | 7.18E-04 | -10.55 | 1.11E-03 | -7.10         | 4.84E-04 | 18.86 | 2.00E-03 | 4.94 |
| chr1.180049625-180049796>CEP350  | CEP350  | 1.98E-02 | -1.72  | 9.32E-04 | -2.93         | 2.29E-04 | 4.37  | 2.51E-03 | 2.39 |
| chr1.180049652-180049796>CEP350  | CEP350  | 1.98E-02 | -1.72  | 9.32E-04 | -2.93         | 2.29E-04 | 4.37  | 2.51E-03 | 2.39 |
| chr1.19470474-19470585>UBR4      | UBR4    | 4.12E-04 | -2.86  | 8.91E-03 | -1.76         | 2.07E-05 | 8.19  | 1.23E-04 | 3.84 |
| chr1.201780731-201780885>NAV1    | NAV1    | 6.28E-05 | -6.82  | 1.22E-04 | -4.98         | 4.14E-05 | 8.94  | 1.12E-01 | 1.36 |
| chr1.235956803-235956912>LYST    | LYST    | 4.09E-04 | -7.06  | 9.57E-05 | Not Estimable | 1.31E-01 | 1.44  | 1.86E-03 | 3.52 |
| chr1.243419358-243419542>SDCCAG8 | SDCCAG8 | 3.06E-04 | -87.36 | 2.16E-03 | -4.61         | 1.69E-02 | 2.32  | 7.16E-03 | 2.94 |
| chr1.243652316-243652442>SDCCAG8 | SDCCAG8 | 1.83E-03 | -2.98  | 1.58E-04 | -8.34         | 6.05E-03 | 2.28  | 6.33E-04 | 4.10 |
| chr1.26799700-26800018>HMG2      | HMG2    | 1.04E-03 | -2.73  | 3.52E-05 | -10.65        | 7.29E-05 | 6.45  | 1.74E-04 | 4.42 |

|                                     |                   |          |       |          |        |          |       |          |       |
|-------------------------------------|-------------------|----------|-------|----------|--------|----------|-------|----------|-------|
| chr1.27431807-27432578>SLC9A1       | SLC9A1            | 4.90E-02 | -1.58 | 3.25E-04 | -4.86  | 1.19E-02 | 1.96  | 3.45E-03 | 2.47  |
| chr1.45987501-45987609>PRDX1        | PRDX1             | 3.62E-06 | <-500 | 1.49E-05 | -8.59  | 9.31E-05 | 3.89  | 4.92E-05 | 4.78  |
| chr1.46467098-46468407>MAST2        | MAST2             | 3.48E-04 | -3.59 | 1.16E-04 | -5.26  | 5.31E-05 | 8.00  | 1.14E-02 | 1.83  |
| chr1.46805848-46806591>NSUN4andFAAH | NSUN4 and<br>FAAH | 6.05E-05 | <-500 | 1.71E-04 | -10.12 | 1.51E-02 | 1.99  | 6.05E-05 | >500  |
| chr1.63269390-63269533>ATG4C        | ATG4C             | 3.01E-05 | -7.06 | 1.05E-05 | -18.05 | 6.94E-05 | 4.82  | 1.23E-05 | 14.55 |
| chr1.78207302-78207433>USP33        | USP33             | 1.91E-03 | -3.35 | 4.75E-03 | -2.62  | 1.69E-02 | 2.01  | 4.67E-04 | 5.92  |
| chr1.85039599-85040103>CTBSandGNG5  | CTBS and<br>GNG5  | 1.53E-03 | -6.62 | 2.47E-03 | -4.94  | 4.75E-04 | 42.06 | 5.65E-04 | 23.30 |
| chr1.85127881-85128058>SSX2IP       | SSX2IP            | 1.86E-01 | -1.31 | 6.50E-04 | -3.62  | 1.03E-02 | 1.98  | 1.57E-04 | 6.44  |
| chr1.89271574-89271700>PKN2         | PKN2              | 6.12E-04 | -6.28 | 1.13E-02 | -2.29  | 1.87E-04 | 23.55 | 1.20E-03 | 4.46  |

|                                         |                   |          |        |          |        |          |       |          |       |
|-----------------------------------------|-------------------|----------|--------|----------|--------|----------|-------|----------|-------|
| chr10.11272033-11272456>CELF2           | CELF2             | 6.92E-04 | -2.68  | 1.36E-04 | -3.96  | 1.47E-05 | 13.37 | 6.22E-05 | 5.22  |
| chr10.32324818-32324922>KIF5B           | KIF5B             | 2.07E-03 | -2.30  | 1.93E-01 | -1.26  | 2.91E-04 | 3.49  | 8.95E-03 | 1.84  |
| chr10.51592090-51592619>LOC100287554    | LOC100287554      | 9.51E-03 | -2.27  | 4.56E-04 | -6.21  | 1.87E-03 | 3.42  | 9.11E-04 | 4.43  |
| chr10.69828759-69829524>HERC4           | HERC4             | 9.83E-04 | -5.89  | 1.21E-02 | -2.38  | 5.78E-04 | 8.60  | 1.86E-04 | >500  |
| chr10.75230828-75230967>PPP3CB          | PPP3CB            | 8.45E-04 | -4.23  | 4.34E-03 | -2.61  | 2.62E-04 | 7.78  | 4.88E-02 | 1.65  |
| chr10.92500578-92502285>HTR7            | HTR7              | 8.97E-05 | -3.59  | 5.98E-02 | -1.38  | 3.65E-04 | 2.65  | 4.87E-03 | 1.82  |
| chr10.99195666-99196308>EXOSC1          | EXOSC1            | 2.77E-04 | -36.28 | 1.45E-02 | -2.32  | 5.19E-04 | 10.77 | 2.56E-03 | 3.92  |
| chr10.99433338-99433902>DHDPSLandPI4K2A | DHDPSL and PI4K2A | 9.07E-05 | -29.65 | 7.99E-05 | -46.47 | 2.70E-04 | 7.33  | 1.53E-04 | 11.94 |
| chr11.111889680-111893310>DIXDC1        | DIXDC1            | 1.93E-04 | -8.50  | 6.36E-03 | -2.33  | 1.87E-02 | 1.90  | 3.94E-04 | 5.46  |

|                                         |                 |          |        |          |        |          |        |          |       |
|-----------------------------------------|-----------------|----------|--------|----------|--------|----------|--------|----------|-------|
| chr11.111889680-111893374>DIXDC1        | DIXDC1          | 1.93E-04 | -8.50  | 6.36E-03 | -2.33  | 1.87E-02 | 1.90   | 3.94E-04 | 5.46  |
| chr11.125490667-125490901>STT3AandCHEK1 | STT3A and CHEK1 | 6.31E-08 | <-500  | 7.17E-08 | -95.82 | 6.83E-08 | 148.17 | 1.54E-07 | 14.95 |
| chr11.47738539-47739064>FNBP4           | FNBP4           | 3.24E-04 | -10.00 | 2.29E-03 | -3.47  | 2.00E-04 | 19.17  | 1.66E-04 | 29.34 |
| chr11.61129205-61129720>CYBASC3         | CYBASC3         | 2.94E-04 | -16.63 | 2.29E-04 | -28.81 | 7.91E-04 | 6.27   | 1.34E-02 | 2.28  |
| chr11.62105383-62105784>saroro          | saroro          | 2.68E-04 | <-500  | 2.68E-04 | <-500  | 2.68E-04 | >500   | 2.68E-04 | >500  |
| chr11.6523983-6524156>FXC1andDNHD1      | FXC1 and DNHD1  | 2.16E-04 | -20.50 | 2.28E-03 | -3.58  | 7.96E-04 | 5.63   | 1.59E-02 | 2.15  |
| chr11.7479027-7479174>veemee            | veemee          | 5.89E-05 | <-500  | 1.17E-03 | -3.62  | 3.17E-03 | 2.75   | 3.03E-04 | 6.49  |
| chr11.836251-836525>CD151               | CD151           | 4.18E-05 | -7.43  | 6.65E-05 | -5.80  | 1.16E-05 | 38.09  | 1.80E-05 | 15.64 |
| chr11.89933252-89935719>CHORDC1         | CHORDC1         | 8.39E-05 | -12.95 | 3.53E-04 | -4.87  | 4.83E-03 | 2.33   | 1.37E-04 | 8.21  |

|                                       |                 |          |         |          |       |          |       |          |               |
|---------------------------------------|-----------------|----------|---------|----------|-------|----------|-------|----------|---------------|
| chr12.10561988-10562183>KLRC4andKLRK1 | KLRC4 and KLRK1 | 2.87E-03 | -3.91   | 8.17E-03 | -2.76 | 1.16E-03 | 6.12  | 3.22E-04 | 33.90         |
| chr12.40441853-40442012>SLC2A13       | SLC2A13         | 6.39E-05 | -5.50   | 3.03E-05 | -8.23 | 7.21E-06 | >500  | 1.36E-05 | 18.27         |
| chr12.48094974-48095387>RPAP3         | RPAP3           | 6.56E-03 | -2.64   | 7.99E-02 | -1.59 | 2.33E-03 | 3.59  | 4.90E-04 | 7.84          |
| chr12.54789679-54790160>ITGA5         | ITGA5           | 9.53E-03 | -2.85   | 1.58E-03 | -6.27 | 5.00E-04 | 28.60 | 5.65E-04 | 20.66         |
| chr12.58345541-58345678>XRCC6BP1      | XRCC6BP1        | 4.42E-05 | -135.95 | 1.80E-04 | -7.31 | 1.49E-03 | 3.11  | 8.16E-05 | 15.47         |
| chr12.6761437-6761584>ING4            | ING4            | 1.90E-05 | -4.46   | 2.22E-04 | -2.56 | 1.61E-03 | 1.94  | 4.32E-05 | 3.55          |
| chr12.96258857-96259166>SNRPF         | SNRPF           | 6.80E-06 | -15.03  | 3.06E-06 | <-500 | 1.16E-05 | 9.15  | 3.05E-06 | Not Estimable |
| chr13.100543572-100543866>CLYBL       | CLYBL           | 1.02E-02 | -2.73   | 8.81E-04 | -9.28 | 3.93E-04 | 47.46 | 7.38E-04 | 11.24         |
| chr13.113864293-113864812>PCID2       | PCID2           | 4.40E-04 | -10.60  | 6.02E-04 | -7.93 | 1.27E-03 | 4.99  | 1.01E-02 | 2.47          |



|                                                       |                               |          |       |          |        |          |       |          |       |
|-------------------------------------------------------|-------------------------------|----------|-------|----------|--------|----------|-------|----------|-------|
| chr13.41593364-41593568>ELF1                          | ELF1                          | 4.35E-04 | <-500 | 9.67E-04 | -11.29 | 4.35E-04 | >500  | 2.23E-03 | 5.56  |
| chr14.100743755-100744113>YY1                         | YY1                           | 4.40E-03 | -3.15 | 1.05E-02 | -2.47  | 2.73E-04 | 26.26 | 3.87E-04 | 13.52 |
| chr14.105236090-105236707>AKT1                        | AKT1                          | 4.84E-05 | -8.22 | 2.03E-04 | -4.18  | 2.23E-05 | 18.04 | 8.26E-05 | 6.02  |
| chr14.20872770-20872931>TEP1                          | TEP1                          | 1.47E-03 | -2.28 | 8.24E-05 | -4.38  | 3.09E-04 | 3.06  | 1.40E-02 | 1.67  |
| chr14.50246313-50246524>KLHDC2                        | KLHDC2                        | 3.77E-02 | -1.71 | 4.58E-04 | -5.34  | 6.75E-03 | 2.34  | 1.83E-03 | 3.20  |
| chr14.52957557-52957723>TXNDC16                       | TXNDC16                       | 1.34E-04 | -4.79 | 3.06E-03 | -2.21  | 3.24E-04 | 3.59  | 7.61E-04 | 2.90  |
| chr14.76107075-76107403>FLVCR2 and TLL5 and C14orf179 | FLVCR2 and TLL5 and C14orf179 | 1.92E-03 | -2.58 | 6.71E-05 | -9.03  | 1.22E-01 | 1.36  | 6.13E-04 | 3.38  |
| chr14.88431849-88431973>GALC                          | GALC                          | 5.67E-04 | -3.67 | 2.77E-03 | -2.48  | 1.18E-03 | 3.01  | 1.19E-04 | 7.15  |
| chr14.88452833-88452946>GALC                          | GALC                          | 3.97E-04 | -3.47 | 2.38E-02 | -1.65  | 8.56E-05 | 6.09  | 1.30E-03 | 2.63  |

|                                  |          |          |        |          |        |          |       |          |      |
|----------------------------------|----------|----------|--------|----------|--------|----------|-------|----------|------|
| chr14.96997812-96999040>PAPOLA   | PAPOLA   | 1.96E-03 | -2.78  | 6.03E-04 | -3.85  | 3.36E-04 | 4.77  | 8.69E-02 | 1.46 |
| chr15.30711214-30711348>rukuru   | rukuru   | 3.01E-04 | -11.05 | 9.53E-04 | -4.94  | 2.39E-03 | 3.45  | 5.73E-03 | 2.68 |
| chr15.38619054-38620016>koyzawbu | koyzawbu | 2.03E-03 | -2.87  | 5.39E-02 | -1.58  | 2.95E-04 | 5.53  | 9.82E-04 | 3.50 |
| chr15.57545460-57545666>stoyguby | stoyguby | 3.39E-05 | -5.43  | 8.44E-04 | -2.40  | 9.44E-05 | 3.83  | 3.07E-03 | 1.98 |
| chr15.59102429-59102587>FAM63B   | FAM63B   | 3.05E-03 | -3.01  | 8.90E-04 | -4.60  | 2.53E-04 | 10.19 | 5.47E-04 | 5.82 |
| chr15.59943710-59944525>GTF2A2   | GTF2A2   | 2.05E-02 | -2.18  | 4.44E-04 | -15.25 | 9.30E-04 | 7.02  | 8.26E-03 | 2.74 |
| chr15.64017491-64017712>HERC1    | HERC1    | 3.68E-04 | -3.52  | 1.84E-04 | -4.37  | 1.36E-03 | 2.59  | 6.20E-03 | 1.99 |
| chr15.66811217-66811416>ZWILCH   | ZWILCH   | 1.42E-06 | -15.75 | 4.47E-06 | -6.69  | 1.61E-05 | 4.16  | 8.06E-05 | 2.88 |
| chr15.66811217-66811467>ZWILCH   | ZWILCH   | 1.42E-06 | -15.75 | 4.47E-06 | -6.69  | 1.61E-05 | 4.16  | 8.06E-05 | 2.88 |
| chr15.75165540-75165688>SCAMP2   | SCAMP2   | 4.19E-04 | -4.48  | 6.10E-03 | -2.22  | 1.95E-03 | 2.82  | 5.15E-02 | 1.57 |

|                                               |                             |          |               |          |        |          |       |          |               |
|-----------------------------------------------|-----------------------------|----------|---------------|----------|--------|----------|-------|----------|---------------|
| chr15.80191177-80191467>ST20andMTHFS          | ST20 and MTHFS              | 7.04E-04 | -5.57         | 2.00E-03 | -3.59  | 2.33E-04 | 13.85 | 3.18E-04 | 9.74          |
| chr15.94774950-94775234>MCTP2                 | MCTP2                       | 4.31E-04 | Not Estimable | 9.26E-04 | -11.80 | 1.11E-03 | 9.54  | 4.31E-04 | Not Estimable |
| chr16.18799866-18800440>ARL6IP1andRPS15A      | ARL6IP1 and RPS15A          | 2.45E-04 | -6.56         | 2.34E-03 | -2.85  | 1.10E-02 | 2.06  | 8.95E-04 | 3.74          |
| chr16.22277711-22277845>EEF2K                 | EEF2K                       | 3.16E-05 | -114.30       | 1.08E-04 | -8.32  | 2.29E-02 | 1.75  | 3.03E-05 | 207.60        |
| chr16.30593851-30595166>syrrar                | syrrar                      | 4.87E-05 | <-500         | 6.03E-04 | -4.33  | 4.87E-05 | >500  | 4.87E-05 | >500          |
| chr16.3493611-3493837>ZNF174andNAT15andCLUAP1 | ZNF174 and NAT15 and CLUAP1 | 3.54E-04 | <-500         | 5.17E-04 | -24.09 | 3.54E-04 | >500  | 3.54E-04 | >500          |
| chr17.18087711-18088067>jeeroy                | jeeroy                      | 1.76E-04 | -13.21        | 6.59E-04 | -4.99  | 1.02E-04 | 43.74 | 1.19E-04 | 26.41         |
| chr17.18486655-18486837>CCDC144B              | CCDC144B                    | 1.37E-02 | -2.53         | 3.39E-04 | <-500  | 3.82E-04 | 76.21 | 1.16E-03 | 7.53          |
| chr17.27581220-27581513>CRYBA1                | CRYBA1                      | 1.03E-04 | -21.86        | 1.74E-03 | -3.27  | 1.66E-04 | 11.01 | 2.63E-04 | 7.47          |

|                                   |           |          |               |          |        |          |       |          |       |
|-----------------------------------|-----------|----------|---------------|----------|--------|----------|-------|----------|-------|
| chr17.36351796-36351996>TBC1D3    | TBC1D3    | 3.07E-04 | -28.30        | 5.13E-03 | -3.10  | 4.66E-04 | 12.72 | 6.73E-04 | 8.57  |
| chr17.40280569-40280818>RAB5C     | RAB5C     | 2.04E-01 | -1.25         | 8.87E-05 | -4.79  | 2.28E-02 | 1.61  | 4.01E-03 | 2.03  |
| chr17.57728564-57728677>CLTC      | CLTC      | 3.52E-03 | -2.77         | 3.21E-04 | -7.06  | 8.42E-04 | 4.33  | 1.79E-03 | 3.34  |
| chr17.61473104-61473289>TANC2     | TANC2     | 3.52E-03 | -2.04         | 7.45E-04 | -2.65  | 4.20E-05 | 6.30  | 1.10E-05 | 20.53 |
| chr17.62745780-62746126>LOC146880 | LOC146880 | 3.51E-03 | -2.39         | 1.24E-03 | -3.00  | 4.23E-04 | 4.10  | 2.41E-04 | 5.09  |
| chr17.77079383-77079672>ENGASE    | ENGASE    | 3.74E-04 | Not Estimable | 2.87E-03 | -4.54  | 2.80E-02 | 2.14  | 5.58E-03 | 3.43  |
| chr18.48443613-48443878>ME2       | ME2       | 1.24E-01 | -1.52         | 1.43E-03 | -5.39  | 4.98E-03 | 3.20  | 4.15E-04 | 17.42 |
| chr18.54318248-54318824>TXNL1     | TXNL1     | 3.27E-04 | -6.40         | 1.59E-04 | -11.19 | 1.61E-03 | 3.33  | 1.10E-04 | 18.33 |
| chr18.67508480-67516323>DOK6      | DOK6      | 2.50E-06 | -3.44         | 3.70E-07 | -5.86  | 1.18E-04 | 2.00  | 1.02E-06 | 4.24  |
| chr19.11411543-11411912>tojaw     | tojaw     | 1.12E-03 | -5.75         | 3.37E-04 | -19.59 | 4.08E-04 | 14.07 | 2.24E-03 | 4.10  |

|                                |          |          |        |          |         |          |               |          |               |
|--------------------------------|----------|----------|--------|----------|---------|----------|---------------|----------|---------------|
| chr19.13009896-13010199>SYCE2  | SYCE2    | 5.66E-02 | -1.66  | 1.16E-04 | -220.29 | 3.22E-04 | 9.45          | 1.70E-04 | 23.14         |
| chr19.1877203-1877424>FAM108A1 | FAM108A1 | 9.46E-06 | -12.34 | 3.12E-05 | -5.70   | 4.87E-06 | 38.02         | 5.84E-06 | 24.14         |
| chr19.1953385-1953505>C19orf34 | C19orf34 | 4.17E-03 | -3.77  | 1.47E-03 | -6.50   | 3.53E-04 | Not Estimable | 9.95E-04 | 8.89          |
| chr19.36515246-36515534>CLIP3  | CLIP3    | 5.36E-02 | -1.78  | 2.47E-04 | <-500   | 2.47E-04 | >500          | 2.48E-04 | >500          |
| chr19.44128266-44128394>CADM4  | CADM4    | 1.35E-01 | -1.38  | 7.22E-04 | -3.71   | 2.08E-02 | 1.80          | 2.51E-04 | 5.61          |
| chr19.44619641-44619995>ZNF225 | ZNF225   | 1.90E-04 | -12.35 | 3.11E-04 | -7.83   | 1.23E-02 | 2.14          | 4.26E-04 | 6.35          |
| chr19.47646729-47646862>SAE1   | SAE1     | 3.77E-03 | -2.25  | 4.22E-04 | -3.71   | 1.10E-03 | 2.88          | 8.17E-02 | 1.43          |
| chr19.47646751-47646862>SAE1   | SAE1     | 3.77E-03 | -2.25  | 4.22E-04 | -3.71   | 1.10E-03 | 2.88          | 8.17E-02 | 1.43          |
| chr19.49314066-49314178>BCAT2  | BCAT2    | 4.79E-03 | -3.77  | 3.15E-03 | -4.55   | 1.48E-03 | 7.25          | 4.22E-04 | Not Estimable |
| chr19.5208248-5208402>PTPRS    | PTPRS    | 2.10E-03 | -4.21  | 4.27E-04 | -13.18  | 8.85E-04 | 6.65          | 5.17E-03 | 3.05          |

|                                         |                   |          |        |          |         |          |               |          |       |
|-----------------------------------------|-------------------|----------|--------|----------|---------|----------|---------------|----------|-------|
| chr19.52207575-52207733>NCRNA00085      | NCRNA00085        | 6.15E-05 | -5.27  | 1.16E-05 | -18.46  | 8.15E-06 | 41.81         | 1.56E-05 | 12.72 |
| chr19.54610118-54610266>NDUFA3          | NDUFA3            | 1.16E-04 | -6.91  | 9.25E-03 | -1.98   | 3.81E-05 | 21.56         | 4.72E-04 | 3.80  |
| chr19.58423428-58423554>ZNF417andZNF814 | ZNF417 and ZNF814 | 2.95E-03 | -3.70  | 3.90E-04 | -15.56  | 2.11E-04 | >500          | 1.83E-02 | 2.20  |
| chr19.58423428-58423557>ZNF417andZNF814 | ZNF417 and ZNF814 | 2.95E-03 | -3.70  | 3.90E-04 | -15.56  | 2.11E-04 | Not Estimable | 1.83E-02 | 2.20  |
| chr19.8441789-8441951>lyta              | lyta              | 5.40E-04 | -8.82  | 3.08E-04 | -17.86  | 1.76E-03 | 4.33          | 3.90E-03 | 3.23  |
| chr19.9720432-9722012>ZNF562andZNF561   | ZNF562 and ZNF561 | 6.18E-04 | -29.45 | 4.65E-04 | -469.78 | 4.39E-03 | 4.01          | 5.13E-04 | 75.31 |
| chr2.110584278-110584424>RGPD5          | RGPD5             | 5.04E-05 | -11.19 | 9.25E-04 | -3.01   | 3.59E-04 | 3.92          | 1.20E-02 | 1.87  |
| chr2.111302237-111302383>RGPD6          | RGPD6             | 5.04E-05 | -11.19 | 9.25E-04 | -3.01   | 3.59E-04 | 3.92          | 1.20E-02 | 1.87  |
| chr2.113175261-113175491>RGPD8          | RGPD8             | 7.54E-05 | -5.13  | 3.91E-05 | -7.04   | 7.22E-06 | >500          | 1.04E-05 | 31.99 |

|                                  |         |          |        |          |       |          |        |          |       |
|----------------------------------|---------|----------|--------|----------|-------|----------|--------|----------|-------|
| chr2.118864235-118864479>INSIG2  | INSIG2  | 5.60E-02 | -1.54  | 1.23E-04 | -7.34 | 2.27E-03 | 2.62   | 9.07E-04 | 3.27  |
| chr2.172848099-172848599>HAT1    | HAT1    | 1.42E-04 | -4.52  | 4.48E-05 | -7.86 | 8.43E-05 | 5.58   | 1.49E-05 | 29.53 |
| chr2.17953901-17954051>GEN1      | GEN1    | 9.89E-05 | -25.31 | 6.70E-05 | <-500 | 6.92E-05 | 199.20 | 1.58E-03 | 3.38  |
| chr2.182339687-182340015>ITGA4   | ITGA4   | 1.90E-05 | -7.51  | 4.08E-03 | -1.92 | 1.03E-04 | 3.82   | 1.08E-05 | 11.34 |
| chr2.198175302-198175503>ANKRD44 | ANKRD44 | 7.11E-04 | -5.58  | 3.26E-04 | -9.66 | 1.03E-02 | 2.31   | 2.81E-02 | 1.89  |
| chr2.208446079-208446884>FAM119A | FAM119A | 3.71E-05 | -9.30  | 3.05E-04 | -3.59 | 4.39E-03 | 2.08   | 5.29E-05 | 7.28  |
| chr2.231663444-231663879>CAB39   | CAB39   | 6.76E-03 | -2.27  | 1.48E-03 | -3.25 | 3.64E-02 | 1.69   | 3.63E-04 | 5.44  |
| chr2.234112772-234113219>INPP5D  | INPP5D  | 1.03E-03 | -3.44  | 4.25E-04 | -4.68 | 1.22E-04 | 9.78   | 2.17E-03 | 2.82  |
| chr2.242282407-242282508>SEPT2   | SEPT2   | 4.07E-03 | -2.55  | 1.80E-03 | -3.12 | 1.84E-04 | 8.63   | 9.02E-04 | 3.85  |

|                                 |         |          |        |          |        |          |       |          |               |
|---------------------------------|---------|----------|--------|----------|--------|----------|-------|----------|---------------|
| chr2.243168539-243168819>samemo | samemo  | 4.94E-03 | -2.98  | 1.72E-02 | -2.18  | 2.23E-04 | 37.87 | 5.29E-04 | 8.73          |
| chr2.73957016-73957156>TPRKB    | TPRKB   | 2.11E-05 | -8.51  | 8.41E-06 | -23.94 | 1.24E-05 | 13.51 | 6.75E-06 | 43.24         |
| chr2.88336462-88336570>KRCC1    | KRCC1   | 1.75E-03 | -3.55  | 5.15E-03 | -2.62  | 2.74E-02 | 1.86  | 1.75E-04 | 15.65         |
| chr20.18449588-18449705>POLR3F  | POLR3F  | 4.95E-05 | -10.82 | 1.16E-03 | -2.83  | 2.93E-04 | 4.13  | 1.75E-05 | Not Estimable |
| chr20.23401942-23402097>NAPB    | NAPB    | 6.00E-05 | <-500  | 4.50E-04 | -5.29  | 5.97E-05 | >500  | 1.09E-04 | 17.28         |
| chr20.30720816-30720929>TM9SF4  | TM9SF4  | 4.31E-04 | -2.58  | 7.10E-02 | -1.36  | 1.55E-03 | 2.11  | 8.38E-03 | 1.71          |
| chr20.34487292-34487561>PHF20   | PHF20   | 1.17E-03 | -5.87  | 7.20E-04 | -8.27  | 4.74E-04 | 12.86 | 2.59E-03 | 3.97          |
| chr20.416929-419485>TBC1D20     | TBC1D20 | 1.36E-03 | -3.68  | 3.76E-04 | -6.52  | 7.71E-04 | 4.55  | 7.72E-03 | 2.33          |
| chr20.43808628-43808775>rotora  | rotora  | 2.81E-04 | -11.96 | 1.75E-03 | -3.84  | 4.47E-04 | 7.75  | 3.40E-03 | 3.09          |
| chr21.40619627-40619758>BRWD1   | BRWD1   | 7.54E-05 | -4.31  | 7.25E-06 | -21.38 | 1.26E-05 | 10.81 | 3.76E-05 | 5.59          |



|                                      |              |          |       |          |        |          |       |          |       |
|--------------------------------------|--------------|----------|-------|----------|--------|----------|-------|----------|-------|
| chr21.47608408-47608855>klorley      | klorley      | 1.80E-02 | -2.14 | 1.56E-03 | -4.41  | 4.26E-04 | 10.24 | 6.69E-03 | 2.71  |
| chr22.20093700-20093800>DGCR8        | DGCR8        | 6.95E-03 | -2.58 | 8.09E-04 | -5.52  | 2.17E-04 | 19.30 | 2.11E-03 | 3.65  |
| chr22.31733654-31734031>sneypoy      | sneypoy      | 5.37E-02 | -1.82 | 3.99E-04 | -39.22 | 1.49E-03 | 6.03  | 1.08E-02 | 2.67  |
| chr22.41175013-41175129>SLC25A17     | SLC25A17     | 7.16E-04 | -7.40 | 3.66E-04 | -14.98 | 6.05E-03 | 2.87  | 9.34E-02 | 1.58  |
| chr22.45254869-45255776>PRR5-ARHGAP8 | PRR5-ARHGAP8 | 1.71E-02 | -2.04 | 9.61E-05 | <-500  | 3.03E-04 | 8.85  | 1.52E-03 | 3.77  |
| chr22.50320903-50321181>CRELD2       | CRELD2       | 1.98E-03 | -4.87 | 3.50E-02 | -1.97  | 5.27E-04 | 14.94 | 4.59E-04 | 19.20 |
| chr22.51221467-51221714>RABL2B       | RABL2B       | 4.84E-06 | <-500 | 9.09E-06 | -18.75 | 5.55E-06 | 85.86 | 2.67E-05 | 7.08  |
| chr3.122283274-122283460>DTX3L       | DTX3L        | 3.86E-03 | -2.45 | 8.96E-04 | -3.51  | 1.54E-01 | 1.35  | 4.78E-04 | 4.34  |
| chr3.137963865-137964523>vusmyby     | vusmyby      | 4.47E-04 | -6.75 | 1.85E-02 | -2.01  | 7.96E-04 | 4.93  | 2.47E-04 | 10.96 |

|                                 |         |          |        |          |               |          |       |          |       |
|---------------------------------|---------|----------|--------|----------|---------------|----------|-------|----------|-------|
| chr3.137963930-137964523>ARMC8  | ARMC8   | 4.47E-04 | -6.75  | 1.85E-02 | -2.01         | 7.96E-04 | 4.93  | 2.47E-04 | 10.96 |
| chr3.137963930-137964524>ARMC8  | ARMC8   | 4.47E-04 | -6.75  | 1.85E-02 | -2.01         | 7.96E-04 | 4.93  | 2.47E-04 | 10.96 |
| chr3.150280329-150280447>EIF2A  | EIF2A   | 1.05E-02 | -1.55  | 4.23E-05 | -3.25         | 1.90E-04 | 2.48  | 1.23E-03 | 1.93  |
| chr3.15778540-15778740>ANKRD28  | ANKRD28 | 1.71E-04 | -3.90  | 1.21E-05 | -23.79        | 1.60E-03 | 2.36  | 2.11E-05 | 11.26 |
| chr3.167452594-167452717>PDCD10 | PDCD10  | 4.97E-03 | -3.83  | 4.68E-04 | Not Estimable | 2.62E-03 | 5.24  | 1.60E-03 | 7.32  |
| chr3.20019802-20020396>RAB5A    | RAB5A   | 4.94E-02 | -1.54  | 3.15E-04 | -4.25         | 8.07E-04 | 3.20  | 1.83E-03 | 2.64  |
| chr3.23929058-23929280>UBE2E1   | UBE2E1  | 1.32E-03 | -3.40  | 3.40E-04 | -5.78         | 6.07E-02 | 1.57  | 2.24E-04 | 7.41  |
| chr3.25637911-25639423>RARB     | RARB    | 6.84E-03 | -2.86  | 4.19E-02 | -1.86         | 4.93E-04 | 12.19 | 2.09E-03 | 4.35  |
| chr3.39162488-39162680>TTC21A   | TTC21A  | 2.31E-02 | -1.64  | 3.37E-04 | -3.48         | 5.93E-05 | 6.73  | 3.03E-05 | 10.81 |
| chr3.52385978-52386119>DNAH1    | DNAH1   | 2.86E-05 | -25.66 | 1.71E-04 | -5.17         | 1.52E-02 | 1.80  | 3.60E-04 | 3.92  |

|                                   |            |          |               |          |               |          |       |          |               |
|-----------------------------------|------------|----------|---------------|----------|---------------|----------|-------|----------|---------------|
| chr3.52561845-52561947>NT5DC2     | NT5DC2     | 5.07E-05 | Not Estimable | 5.07E-05 | <-500         | 6.23E-05 | 50.64 | 5.07E-05 | Not Estimable |
| chr3.69028819-69028938>C3orf64    | C3orf64    | 4.34E-04 | -276.88       | 1.44E-03 | -7.40         | 6.00E-04 | 25.32 | 9.40E-04 | 11.26         |
| chr3.81552424-81552865>chordybo   | chordybo   | 2.18E-04 | -6.44         | 4.03E-05 | Not Estimable | 4.30E-04 | 4.65  | 7.72E-03 | 2.16          |
| chr4.122723829-122723948>EXOSC9   | EXOSC9     | 1.45E-03 | -2.35         | 3.00E-04 | -3.21         | 1.36E-02 | 1.70  | 9.05E-05 | 4.55          |
| chr4.122723829-122723983>EXOSC9   | EXOSC9     | 1.45E-03 | -2.35         | 3.00E-04 | -3.21         | 1.36E-02 | 1.70  | 9.05E-05 | 4.55          |
| chr4.157731989-157732169>PDGFC    | PDGFC      | 7.75E-04 | -2.40         | 6.25E-03 | -1.79         | 4.00E-05 | 4.91  | 9.27E-05 | 3.76          |
| chr4.175223190-175223337>KIAA1712 | KIAA1712   | 3.59E-04 | -10.22        | 9.07E-02 | -1.55         | 6.69E-03 | 2.62  | 1.66E-03 | 4.04          |
| chr4.40800804-40800921>NSUN7      | NSUN7      | 6.85E-02 | -1.65         | 4.03E-04 | -10.82        | 2.93E-04 | 16.64 | 1.48E-03 | 4.51          |
| chr4.76874494-76874938>sporsmorby | sporsmorby | 8.09E-03 | -2.96         | 4.72E-04 | -28.20        | 2.56E-02 | 2.16  | 2.57E-01 | 1.34          |

|                                           |                    |          |        |          |        |          |               |          |               |
|-------------------------------------------|--------------------|----------|--------|----------|--------|----------|---------------|----------|---------------|
| chr5.134343647-134343829>PCBD2andCATSPER3 | PCBD2 and CATSPER3 | 1.80E-02 | -2.37  | 6.68E-03 | -3.17  | 3.53E-04 | Not Estimable | 5.92E-04 | 17.76         |
| chr5.139929370-139930496>APBB3andSRA1     | APBB3 and SRA1     | 2.46E-01 | -1.21  | 2.97E-04 | -3.06  | 1.24E-02 | 1.69          | 1.95E-03 | 2.17          |
| chr5.140895496-140896575>DIAPH1           | DIAPH1             | 2.42E-03 | -3.84  | 3.56E-04 | -14.80 | 2.77E-04 | 23.85         | 9.58E-04 | 5.96          |
| chr5.140895875-140896575>DIAPH1           | DIAPH1             | 5.18E-05 | -5.97  | 9.76E-06 | -34.42 | 1.45E-05 | 16.01         | 1.20E-05 | 21.48         |
| chr5.14381239-14381361>TRIO               | TRIO               | 7.18E-04 | -3.91  | 1.44E-02 | -1.95  | 2.22E-04 | 6.59          | 1.32E-03 | 3.25          |
| chr5.145493406-145493874>LARS             | LARS               | 4.03E-04 | -11.34 | 3.32E-03 | -3.36  | 8.40E-04 | 6.17          | 5.02E-04 | 9.06          |
| chr5.35053745-35054334>fugey              | fugey              | 4.00E-04 | -9.01  | 8.14E-04 | -5.54  | 3.29E-04 | 10.88         | 1.32E-04 | Not Estimable |
| chr5.39274505-39274630>FYB                | FYB                | 1.63E-02 | -2.33  | 3.89E-04 | -24.35 | 1.29E-03 | 6.00          | 4.56E-02 | 1.85          |
| chr5.70531277-70532281>goychyby           | goychyby           | 1.10E-02 | -2.03  | 2.29E-04 | -6.29  | 6.59E-04 | 3.97          | 2.19E-03 | 2.81          |

|                                         |                  |          |         |          |        |          |       |          |      |
|-----------------------------------------|------------------|----------|---------|----------|--------|----------|-------|----------|------|
| chr5.77656415-77656552>SCAMP1           | SCAMP1           | 1.07E-03 | -4.46   | 2.97E-04 | -9.88  | 4.46E-04 | 7.11  | 3.67E-02 | 1.79 |
| chr6.109248281-109249436>ARMC2          | ARMC2            | 2.72E-03 | -2.24   | 1.30E-02 | -1.77  | 2.08E-04 | 4.04  | 8.43E-02 | 1.40 |
| chr6.122792844-122793050>SERINC1        | SERINC1          | 1.45E-02 | -2.14   | 5.74E-03 | -2.63  | 2.50E-03 | 3.31  | 3.03E-04 | 9.93 |
| chr6.144289727-144290115>PLAGL1andHYMAI | PLAGL1 and HYMAI | 1.74E-01 | -1.44   | 4.00E-04 | -32.52 | 4.43E-04 | 23.92 | 4.81E-03 | 3.42 |
| chr6.153291654-153292549>FBXO5          | FBXO5            | 3.31E-04 | -3.25   | 1.32E-03 | -2.43  | 4.35E-03 | 2.01  | 2.30E-02 | 1.61 |
| chr6.153291660-153292549>FBXO5          | FBXO5            | 3.31E-04 | -3.25   | 1.32E-03 | -2.43  | 4.35E-03 | 2.01  | 2.30E-02 | 1.61 |
| chr6.153291674-153292549>FBXO5          | FBXO5            | 3.31E-04 | -3.25   | 1.32E-03 | -2.43  | 4.35E-03 | 2.01  | 2.30E-02 | 1.61 |
| chr6.158088239-158089557>fyjaw          | fyjaw            | 8.63E-04 | -4.25   | 2.52E-02 | -1.85  | 1.77E-03 | 3.33  | 2.99E-04 | 7.26 |
| chr6.3021094-3022352>tevyvybo           | tevyvybo         | 3.80E-05 | -140.84 | 4.06E-05 | -74.72 | 9.11E-04 | 3.45  | 1.27E-04 | 8.48 |

|                                          |                        |          |       |          |                  |          |       |          |       |
|------------------------------------------|------------------------|----------|-------|----------|------------------|----------|-------|----------|-------|
| chr6.34360041-34360260>RPS10andNUDT3     | RPS10 and<br>NUDT3     | 5.81E-04 | -4.24 | 8.57E-05 | -15.64           | 7.24E-05 | 20.73 | 1.60E-04 | 8.25  |
| chr6.41036580-41036692>C6orf130andUNC5CL | C6orf130 and<br>UNC5CL | 3.57E-04 | -5.13 | 1.22E-04 | -10.16           | 7.37E-04 | 3.87  | 1.49E-03 | 3.13  |
| chr6.41751200-41751976>PRICKLE4andTOMM6  | PRICKLE4 and<br>TOMM6  | 4.62E-03 | -2.80 | 2.51E-04 | -12.58           | 4.03E-04 | 7.96  | 9.63E-04 | 4.78  |
| chr6.79664949-79665569>PHIPandTRNAF13P   | PHIP and<br>TRNAF13P   | 1.35E-03 | -2.92 | 2.55E-05 | Not<br>Estimable | 1.30E-04 | 6.84  | 5.14E-05 | 15.62 |
| chr7.149598-152547>kehera                | kehera                 | 1.33E-02 | -1.71 | 1.29E-03 | -2.42            | 9.72E-02 | 1.36  | 4.40E-04 | 2.99  |
| chr7.22980878-22987334>FAM126A           | FAM126A                | 5.13E-04 | -2.56 | 4.24E-05 | -4.72            | 8.77E-03 | 1.71  | 1.84E-03 | 2.09  |
| chr7.2635311-2636062>dochuby             | dochuby                | 3.67E-04 | -4.19 | 1.69E-04 | -5.80            | 4.01E-03 | 2.30  | 2.63E-02 | 1.70  |
| chr7.29549802-29552165>klerky            | klerky                 | 1.88E-04 | -6.48 | 3.73E-03 | -2.44            | 2.29E-02 | 1.77  | 8.77E-02 | 1.46  |

|                                 |          |          |         |          |        |          |               |          |               |
|---------------------------------|----------|----------|---------|----------|--------|----------|---------------|----------|---------------|
| chr7.45083306-45083697>CCM2     | CCM2     | 2.52E-02 | -1.90   | 8.39E-04 | -4.83  | 1.36E-03 | 3.96          | 3.71E-04 | 7.72          |
| chr7.5938415-5938550>CCZ1       | CCZ1     | 5.04E-07 | -252.68 | 2.41E-06 | -8.08  | 7.48E-06 | 4.89          | 1.37E-06 | 12.27         |
| chr7.74166365-74166897>GTF2I    | GTF2I    | 2.27E-03 | -3.76   | 5.26E-04 | -8.20  | 7.50E-04 | 6.36          | 2.45E-04 | 22.31         |
| chr7.76870183-76870364>CCDC146  | CCDC146  | 1.69E-05 | -12.37  | 4.46E-05 | -6.24  | 4.43E-04 | 2.97          | 6.52E-06 | Not Estimable |
| chr8.104455023-104455428>DCAF13 | DCAF13   | 4.47E-02 | -1.81   | 1.12E-02 | -2.44  | 5.04E-03 | 3.04          | 4.85E-04 | 10.67         |
| chr8.133984843-133984986>TG     | TG       | 3.27E-02 | -1.99   | 2.69E-04 | <-500  | 2.69E-04 | Not Estimable | 2.69E-04 | >500          |
| chr8.24256387-24256553>ADAMDEC1 | ADAMDEC1 | 1.89E-02 | -2.37   | 1.55E-03 | -6.56  | 3.81E-04 | Not Estimable | 5.79E-02 | 1.82          |
| chr8.30948350-30948458>WRN      | WRN      | 9.84E-05 | -8.13   | 4.33E-05 | -19.99 | 6.54E-04 | 3.52          | 1.58E-04 | 6.10          |
| chr8.62438536-62438671>ASPH     | ASPH     | 1.08E-03 | -5.20   | 5.24E-03 | -2.88  | 2.06E-02 | 2.07          | 3.63E-04 | 11.88         |
| chr8.74858684-74859055>TCEB1    | TCEB1    | 2.36E-04 | -11.51  | 1.83E-04 | -16.10 | 3.38E-04 | 8.24          | 1.05E-03 | 4.38          |

|                                 |        |          |        |          |        |          |      |          |       |
|---------------------------------|--------|----------|--------|----------|--------|----------|------|----------|-------|
| chr9.17135038-17135423>CNTLN    | CNTLN  | 3.03E-02 | -1.91  | 1.90E-03 | -3.97  | 8.64E-04 | 5.73 | 4.80E-04 | 8.60  |
| chr9.33264164-33264493>CHMP5    | CHMP5  | 1.44E-04 | -11.82 | 8.33E-04 | -4.08  | 1.94E-04 | 8.91 | 4.09E-04 | 5.53  |
| chr9.35737655-35737936>GBA2     | GBA2   | 6.33E-03 | -3.43  | 4.89E-04 | -96.76 | 1.37E-03 | 8.06 | 5.25E-04 | 55.35 |
| chrX.118985730-118985836>UPF3B  | UPF3B  | 1.13E-04 | <-500  | 1.55E-03 | -3.93  | 3.89E-03 | 2.93 | 8.72E-04 | 4.99  |
| chrX.138864706-138864887>ATP11C | ATP11C | 3.68E-03 | -3.31  | 2.76E-04 | -23.71 | 1.59E-02 | 2.23 | 9.95E-04 | 5.80  |
| chrX.149924161-149924396>MTMR1  | MTMR1  | 1.84E-03 | -6.49  | 4.58E-04 | <-500  | 2.92E-03 | 4.89 | 6.99E-03 | 3.33  |
| chrX.153744234-153744566>FAM3A  | FAM3A  | 1.07E-04 | -54.24 | 3.85E-04 | -7.03  | 2.63E-04 | 9.43 | 8.88E-04 | 4.53  |
| chrX.15862547-15863639>AP1S2    | AP1S2  | 9.09E-05 | -5.62  | 1.65E-04 | -4.42  | 4.01E-03 | 2.12 | 6.08E-02 | 1.46  |
| chrX.16870674-16871149>RBBP7    | RBBP7  | 6.02E-03 | -2.99  | 2.65E-03 | -3.99  | 8.60E-04 | 7.37 | 3.25E-04 | 29.04 |
| chrX.2839944-2840065>ARSD       | ARSD   | 1.44E-03 | -3.53  | 4.55E-02 | -1.67  | 3.00E-03 | 2.86 | 3.95E-04 | 6.06  |



| chrX.74282163-74282417>ABCB7     | ABCB7       | 1.09E-03               | -5.81  | 8.03E-04         | -7.10 | 1.32E-02        | 2.36  | 3.38E-04             | 19.17 |
|----------------------------------|-------------|------------------------|--------|------------------|-------|-----------------|-------|----------------------|-------|
| chrX.76776266-76776394>ATRX      | ATRX        | 3.40E-06               | -5.28  | 1.40E-04         | -2.35 | 1.89E-03        | 1.75  | 6.84E-06             | 4.23  |
| chrX.77303661-77305892>ATP7A     | ATP7A       | 1.55E-04               | -10.33 | 2.03E-03         | -3.04 | 3.29E-01        | 1.22  | 1.05E-03             | 3.70  |
| <b>Upregulated in Controls</b>   |             |                        |        |                  |       |                 |       |                      |       |
| Marker ID                        | Gene Symbol | CE Stroke vs. Controls |        | Controls vs. ICH |       | Controls vs. LV |       | Controls vs. Lacunar |       |
|                                  |             | p-value                | FC     | p-value          | FC    | p-value         | FC    | p-value              | FC    |
| chr1.53416427-53416558>SCP2      | SCP2        | 4.14E-04               | -3.65  | 3.66E-02         | 1.59  | 1.42E-03        | 2.69  | 6.07E-03             | 2.06  |
| chr14.19683027-19683434>DUXAP10  | DUXAP10     | 3.62E-05               | -29.94 | 1.14E-04         | 7.36  | 2.52E-05        | >500  | 4.66E-05             | 17.76 |
| chr17.42982993-42984756>GFAP     | GFAP        | 6.98E-04               | -5.06  | 1.25E-02         | 2.15  | 4.86E-03        | 2.65  | 2.89E-04             | 8.76  |
| chr18.28642978-28643439>DSC2     | DSC2        | 2.44E-02               | -1.84  | 5.93E-03         | 2.41  | 1.09E-03        | 3.79  | 1.88E-04             | 9.74  |
| chr18.43417478-43417850>SIGLEC15 | SIGLEC15    | 3.26E-04               | <-500  | 2.04E-03         | 5.10  | 1.43E-02        | 2.49  | 4.84E-02             | 1.87  |
| chr19.39138368-39138547>ACTN4    | ACTN4       | 1.33E-05               | -8.92  | 1.30E-04         | 3.51  | 5.83E-06        | 22.30 | 3.57E-05             | 5.30  |

|                                        |                  |          |        |          |       |          |       |          |       |
|----------------------------------------|------------------|----------|--------|----------|-------|----------|-------|----------|-------|
| chr19.45543176-45543569>SFRS16         | SFRS16           | 1.43E-04 | <-500  | 4.87E-03 | 2.87  | 3.81E-04 | 9.97  | 2.38E-04 | 18.83 |
| chr2.101606718-101606908>NPAS2         | NPAS2            | 2.57E-04 | -6.61  | 5.03E-04 | 4.72  | 7.16E-05 | 30.24 | 3.23E-03 | 2.67  |
| chr2.242611606-242612016>ATG4B         | ATG4B            | 8.42E-05 | -8.04  | 3.53E-05 | 20.98 | 1.89E-04 | 5.17  | 1.07E-03 | 2.97  |
| chr20.32880178-32880359>AHCY           | AHCY             | 2.22E-03 | -4.21  | 5.50E-03 | 3.04  | 3.66E-04 | 18.76 | 1.14E-02 | 2.48  |
| chr22.36892014-36892255>FOXRED2andTXN2 | FOXRED2 and TXN2 | 2.48E-04 | -5.82  | 1.19E-02 | 1.99  | 4.04E-03 | 2.43  | 7.88E-02 | 1.49  |
| chr22.41252435-41253036>ST13           | ST13             | 1.56E-03 | -7.62  | 3.49E-03 | 4.55  | 4.81E-04 | >500  | 4.81E-04 | >500  |
| chr6.32806430-32806547>TAP2andHLA-DOB  | TAP2 and HLA-DOB | 9.55E-05 | <-500  | 2.92E-03 | 3.07  | 2.70E-04 | 9.81  | 7.48E-04 | 5.03  |
| chr7.101475858-101476865>snorkar       | snorkar          | 2.78E-04 | -23.06 | 2.33E-02 | 2.05  | 2.70E-03 | 3.68  | 6.83E-03 | 2.75  |
| chr9.140473077-140473340>WDR85         | WDR85            | 3.68E-05 | -31.77 | 4.74E-04 | 3.93  | 1.31E-04 | 6.90  | 6.73E-05 | 11.64 |

|                               |        |          |               |          |      |          |       |          |       |
|-------------------------------|--------|----------|---------------|----------|------|----------|-------|----------|-------|
| chr9.95018962-95019082>IARS   | IARS   | 1.52E-05 | -7.76         | 2.30E-04 | 3.02 | 7.17E-05 | 4.05  | 2.90E-05 | 5.60  |
| chr9.96866557-96866667>PTPDC1 | PTPDC1 | 3.10E-07 | Not Estimable | 7.27E-04 | 1.95 | 8.40E-07 | 13.03 | 3.13E-07 | >500  |
| chrX.48367956-48368344>PORCN  | PORCN  | 4.63E-05 | -86.44        | 4.10E-05 | >500 | 4.91E-05 | 58.47 | 7.98E-05 | 16.02 |
