# Supplementary material for: Intracerebral Hemorrhage and Ischemic Stroke of Different Etiologies Have Distinct Alternatively Spliced mRNA Profiles in the Blood: a Pilot RNA-seq Study
Source: PubMed Central journal article supplement (PMC4485700; doi:10.1007/s12975-015-0407-9), 2015-05-22
Supplement: 12975_2015_407_MOESM8_ESM.pdf [file 12975_2015_407_MOESM8_ESM.pdf]

SUPPLEMENTARY TABLE 8. Over-represented Pathways and Gene Ontology for the Upregulated Exons

**Cardioembolic Ischemic Stroke**

**SIGNIFICANTLY ENRICHED CANONICAL PATHWAYS OF CARDIOEMBOLIC ISCHEMIC STROKE**

| Ingenuity Canonical Pathways    | -log(p-value) | B-H p-value      | Ratio    | Molecules |
|---------------------------------|---------------|------------------|----------|-----------|
| Semaphorin Signaling in Neurons | 1.41E00       | 6.9E-03-7.47E-02 | 1.89E-02 | PLXNB1    |

**GENE ONTOLOGY OF CARDIOEMBOLIC ISCHEMIC STROKE**

**Annotation Cluster 1 Enrichment Score: 1.5478345985149118**

| Category      | Term                         | Count | %     | PValue | Genes                                                          | List Total | Pop Hits | Pop Total | Fold Enrichment | Benjamini | FDR   |
|---------------|------------------------------|-------|-------|--------|----------------------------------------------------------------|------------|----------|-----------|-----------------|-----------|-------|
| GOTERM_MF_FAT | GO:0046872~metal ion binding | 9     | 47.37 | 0.03   | STEAP3, ZNF33A, UPF1, LPP, ZNF417, ZNF814, TRPV5, TTN, SLC10A1 | 14         | 4140     | 12983     | 2.02            | 0.89      | 24.97 |
| GOTERM_MF_FAT | GO:0043169~cation binding    | 9     | 47.37 | 0.03   | STEAP3, ZNF33A, UPF1, LPP, ZNF417, ZNF814, TRPV5, TTN, SLC10A1 | 14         | 4179     | 12983     | 2.00            | 0.69      | 26.24 |
| GOTERM_MF_FAT | GO:0043167~ion binding       | 9     | 47.37 | 0.03   | STEAP3, ZNF33A, UPF1, LPP, ZNF417, ZNF814, TRPV5, TTN, SLC10A1 | 14         | 4241     | 12983     | 1.97            | 0.58      | 28.33 |

**Annotation Cluster 2 Enrichment Score: 1.4272404656779223**

| Category      | Term                                    | Count | %     | PValue | Genes                                       | List Total | Pop Hits | Pop Total | Fold Enrichment | Benjamini | FDR   |
|---------------|-----------------------------------------|-------|-------|--------|---------------------------------------------|------------|----------|-----------|-----------------|-----------|-------|
| GOTERM_CC_FAT | GO:0005887~integral to plasma membrane  | 4     | 21.05 | 0.03   | PLXNB1, PTPRN2, TRPV5, SLC10A1              | 9          | 1188     | 12782     | 4.78            | 0.75      | 25.81 |
| GOTERM_CC_FAT | GO:0031226~intrinsic to plasma membrane | 4     | 21.05 | 0.03   | PLXNB1, PTPRN2, TRPV5, SLC10A1              | 9          | 1215     | 12782     | 4.68            | 0.53      | 27.17 |
| GOTERM_CC_FAT | GO:0044459~plasma membrane part         | 5     | 26.32 | 0.03   | PLXNB1, LPP, PTPRN2, TRPV5, SLC10A1         | 9          | 2203     | 12782     | 3.22            | 0.40      | 27.86 |
| GOTERM_CC_FAT | GO:0005886~plasma membrane              | 6     | 31.58 | 0.05   | STEAP3, PLXNB1, LPP, PTPRN2, TRPV5, SLC10A1 | 9          | 3777     | 12782     | 2.26            | 0.46      | 40.79 |

**Annotation Cluster 3 Enrichment Score: 1.228190007997564**

| Category      | Term                           | Count | %     | PValue | Genes                                       | List Total | Pop Hits | Pop Total | Fold Enrichment | Benjamini | FDR   |
|---------------|--------------------------------|-------|-------|--------|---------------------------------------------|------------|----------|-----------|-----------------|-----------|-------|
| GOTERM_BP_FAT | GO:0030001~metal ion transport | 3     | 15.79 | 0.05   | STEAP3, TRPV5, SLC10A1                      | 12         | 465      | 13528     | 7.27            | 1.00      | 48.17 |
| GOTERM_CC_FAT | GO:0005886~plasma membrane     | 6     | 31.58 | 0.05   | STEAP3, PLXNB1, LPP, PTPRN2, TRPV5, SLC10A1 | 9          | 3777     | 12782     | 2.26            | 0.46      | 40.79 |
| GOTERM_BP_FAT | GO:0006812~cation transport    | 3     | 15.79 | 0.07   | STEAP3, TRPV5, SLC10A1                      | 12         | 553      | 13528     | 6.12            | 1.00      | 59.48 |

**Large Vessel Ischemic Stroke**

**SIGNIFICANTLY ENRICHED CANONICAL PATHWAYS OF LARGE VESSEL ISCHEMIC STROKE**

| Ingenuity Canonical Pathways         | -log(p-value) | -log(B-H p-value) | Ratio    | Molecules |
|--------------------------------------|---------------|-------------------|----------|-----------|
| Oxidized GTP and dGTP Detoxification | 2.44E00       | 1E00              | 3.33E-01 | NUDT1     |

|                                                                    |         |          |          |         |
|--------------------------------------------------------------------|---------|----------|----------|---------|
| UDP-N-acetyl-D-glucosamine Biosynthesis II                         | 2.14E00 | 1E00     | 1.67E-01 | GNPNAT1 |
| Glycoaminoglycan-protein Linkage Region Biosynthesis               | 2.08E00 | 1E00     | 1.43E-01 | B3GAT3  |
| UDP-N-acetyl-D-galactosamine Biosynthesis II                       | 1.97E00 | 1E00     | 1.11E-01 | GNPNAT1 |
| Thyroid Hormone Metabolism II (via Conjugation and/or Degradation) | 1.44E00 | 7.92E-01 | 3.23E-02 | B3GAT3  |
| Nucleotide Excision Repair Pathway                                 | 1.38E00 | 7.92E-01 | 2.86E-02 | ERCC5   |

#### GENE ONTOLOGY OF LARGE VESSEL ISCHEMIC STROKE

##### Annotation Cluster 1 Enrichment Score: 1.9116473785151364

| Category      | Term                                     | Count | %      | PValue | Genes                                                  | List Total | Pop Hits | Pop Total | Fold Enrichment | Benjamini | FDR   |
|---------------|------------------------------------------|-------|--------|--------|--------------------------------------------------------|------------|----------|-----------|-----------------|-----------|-------|
| GOTERM_CC_FAT | GO:0070013~intracellular organelle lumen | 8     | 26.667 | 0.01   | PDK1, ERCC5, PNMA3, CENPF, PCSK6, DIMT1L, DNAJA3, CBX5 | 20         | 1779     | 12782     | 2.87            | 0.64      | 11.29 |
| GOTERM_CC_FAT | GO:0043233~organelle lumen               | 8     | 26.667 | 0.01   | PDK1, ERCC5, PNMA3, CENPF, PCSK6, DIMT1L, DNAJA3, CBX5 | 20         | 1820     | 12782     | 2.81            | 0.43      | 12.68 |
| GOTERM_CC_FAT | GO:0031974~membrane-enclosed lumen       | 8     | 26.667 | 0.01   | PDK1, ERCC5, PNMA3, CENPF, PCSK6, DIMT1L, DNAJA3, CBX5 | 20         | 1856     | 12782     | 2.75            | 0.34      | 13.98 |

##### Annotation Cluster 2 Enrichment Score: 1.6656724740255078

| Category      | Term                                                    | Count | %      | PValue | Genes                       | List Total | Pop Hits | Pop Total | Fold Enrichment | Benjamini | FDR   |
|---------------|---------------------------------------------------------|-------|--------|--------|-----------------------------|------------|----------|-----------|-----------------|-----------|-------|
| GOTERM_BP_FAT | GO:0043066~negative regulation of apoptosis             | 4     | 13.333 | 0.01   | ERCC5, RIPK2, PCSK6, DNAJA3 | 20         | 354      | 13528     | 7.64            | 1.00      | 16.49 |
| GOTERM_BP_FAT | GO:0043069~negative regulation of programmed cell death | 4     | 13.333 | 0.01   | ERCC5, RIPK2, PCSK6, DNAJA3 | 20         | 359      | 13528     | 7.54            | 0.95      | 17.07 |
| GOTERM_BP_FAT | GO:0060548~negative regulation of cell death            | 4     | 13.333 | 0.01   | ERCC5, RIPK2, PCSK6, DNAJA3 | 20         | 360      | 13528     | 7.52            | 0.87      | 17.19 |
| GOTERM_BP_FAT | GO:0042981~regulation of apoptosis                      | 4     | 13.333 | 0.10   | ERCC5, RIPK2, PCSK6, DNAJA3 | 20         | 804      | 13528     | 3.37            | 0.96      | 77.51 |

##### Annotation Cluster 3 Enrichment Score: 1.3439751095199926

| Category      | Term                                            | Count | %      | PValue | Genes                    | List Total | Pop Hits | Pop Total | Fold Enrichment | Benjamini | FDR   |
|---------------|-------------------------------------------------|-------|--------|--------|--------------------------|------------|----------|-----------|-----------------|-----------|-------|
| GOTERM_BP_FAT | GO:0016481~negative regulation of transcription | 4     | 13.333 | 0.03   | LMCD1, CENPF, NSD1, CBX5 | 20         | 459      | 13528     | 5.89            | 0.94      | 30.30 |
| GOTERM_MF_FAT | GO:0003682~chromatin binding                    | 3     | 10     | 0.03   | CENPF, NSD1, CBX5        | 24         | 150      | 12983     | 10.82           | 0.98      | 28.76 |

|               |                                                                                                         |   |        |      |                            |    |     |       |      |      |       |
|---------------|---------------------------------------------------------------------------------------------------------|---|--------|------|----------------------------|----|-----|-------|------|------|-------|
| GOTERM_BP_FAT | GO:0010629~negative regulation of gene expression                                                       | 4 | 13.333 | 0.03 | LMCD1, CENPF, NSD1, CBX5   | 20 | 504 | 13528 | 5.37 | 0.95 | 36.94 |
| GOTERM_BP_FAT | GO:0045934~negative regulation of nucleobase, nucleoside, nucleotide and nucleic acid metabolic process | 4 | 13.333 | 0.03 | LMCD1, CENPF, NSD1, CBX5   | 20 | 512 | 13528 | 5.28 | 0.89 | 38.15 |
| GOTERM_BP_FAT | GO:0051172~negative regulation of nitrogen compound metabolic process                                   | 4 | 13.333 | 0.03 | LMCD1, CENPF, NSD1, CBX5   | 20 | 519 | 13528 | 5.21 | 0.86 | 39.20 |
| GOTERM_BP_FAT | GO:0010558~negative regulation of macromolecule biosynthetic process                                    | 4 | 13.333 | 0.04 | LMCD1, CENPF, NSD1, CBX5   | 20 | 547 | 13528 | 4.95 | 0.87 | 43.44 |
| GOTERM_BP_FAT | GO:0031327~negative regulation of cellular biosynthetic process                                         | 4 | 13.333 | 0.04 | LMCD1, CENPF, NSD1, CBX5   | 20 | 561 | 13528 | 4.82 | 0.86 | 45.56 |
| GOTERM_BP_FAT | GO:0009890~negative regulation of biosynthetic process                                                  | 4 | 13.333 | 0.04 | LMCD1, CENPF, NSD1, CBX5   | 20 | 573 | 13528 | 4.72 | 0.84 | 47.38 |
| GOTERM_MF_FAT | GO:0008134~transcription factor binding                                                                 | 4 | 13.333 | 0.06 | LMCD1, CENPF, NSD1, DNAJA3 | 24 | 513 | 12983 | 4.22 | 0.98 | 51.71 |
| GOTERM_BP_FAT | GO:0010605~negative regulation of macromolecule metabolic process                                       | 4 | 13.333 | 0.08 | LMCD1, CENPF, NSD1, CBX5   | 20 | 734 | 13528 | 3.69 | 0.96 | 69.72 |
| GOTERM_BP_FAT | GO:0045892~negative regulation of transcription, DNA-dependent                                          | 3 | 10     | 0.09 | LMCD1, NSD1, CBX5          | 20 | 356 | 13528 | 5.70 | 0.96 | 72.98 |
| GOTERM_BP_FAT | GO:0051253~negative regulation of RNA metabolic process                                                 | 3 | 10     | 0.09 | LMCD1, NSD1, CBX5          | 20 | 362 | 13528 | 5.61 | 0.95 | 74.03 |

### Lacunar Ischemic Stroke

#### SIGNIFICANTLY ENRICHED CANONICAL PATHWAYS OF LACUNAR ISCHEMIC STROKE

| Ingenuity Canonical Pathways          | -log(p-value) | -log(B-H p-value) | Ratio    | Molecules |
|---------------------------------------|---------------|-------------------|----------|-----------|
| Eumelanin Biosynthesis                | 2.34E00       | 7.03E-01          | 2.5E-01  | DDT       |
| G Protein Signaling Mediated by Tubby | 1.43E00       | 6.15E-01          | 3.03E-02 | GNG3      |

#### GENE ONTOLOGY OF LACUNAR ISCHEMIC STROKE

Not Available with 0.1 Ease

### Intracerebral Hemorrhagic Stroke

#### SIGNIFICANTLY ENRICHED CANONICAL PATHWAYS OF INTRACEREBRAL HEMORRHAGIC STROKE

| Ingenuity Canonical Pathways            | -log(p-value) | -log(B-H p-value) | Ratio    | Molecules                                 |
|-----------------------------------------|---------------|-------------------|----------|-------------------------------------------|
| Regulation of eIF4 and p70S6K Signaling | 3.54E00       | 1.14E00           | 4.79E-02 | SHC1,AKT1,RPS10,ITGA5,RPS15A,EIF2A,ITGA4  |
| PTEN Signaling                          | 3.24E00       | 1.14E00           | 5.08E-02 | MAST2,SHC1,AKT1,ITGA5,INPP5D,ITGA4        |
| Actin Cytoskeleton Signaling            | 2.53E00       | 8.12E-01          | 3.23E-02 | SHC1,DIAPH1,ITGA5,TRIO,SLC9A1,PDGFC,ITGA4 |

|                                                            |         |          |          |                                              |
|------------------------------------------------------------|---------|----------|----------|----------------------------------------------|
| IL-3 Signaling                                             | 2.47E00 | 8.12E-01 | 5.63E-02 | SHC1,AKT1,PPP3CB,INPP5D                      |
| Caveolar-mediated Endocytosis Signaling                    | 2.45E00 | 8.12E-01 | 5.56E-02 | RAB5A,RAB5C,ITGA5,ITGA4                      |
| Ephrin Receptor Signaling                                  | 2.38E00 | 8.12E-01 | 3.45E-02 | SHC1,AKT1,ITGA5,GNG5,PDGFC,ITGA4             |
| PI3K/AKT Signaling                                         | 2.36E00 | 8.12E-01 | 4.07E-02 | SHC1,AKT1,ITGA5,INPP5D,ITGA4                 |
| FcγRIIB Signaling in B Lymphocytes                         | 2.27E00 | 8.12E-01 | 7.32E-02 | SHC1,AKT1,INPP5D                             |
| Clathrin-mediated Endocytosis Signaling                    | 2.25E00 | 8.12E-01 | 3.24E-02 | RAB5A,RAB5C,PPP3CB,CLTC,ITGA5,PDGFC          |
| DNA Double-Strand Break Repair by Homologous Recombination | 2.2E00  | 8.08E-01 | 1.43E-01 | GEN1,ATRX                                    |
| Neuregulin Signaling                                       | 2.14E00 | 8.08E-01 | 4.55E-02 | SHC1,AKT1,ITGA5,ITGA4                        |
| PAK Signaling                                              | 2.12E00 | 8.08E-01 | 4.49E-02 | SHC1,ITGA5,PDGFC,ITGA4                       |
| Telomerase Signaling                                       | 1.96E00 | 6.84E-01 | 4.04E-02 | SHC1,AKT1,TEP1,ELF1                          |
| HGF Signaling                                              | 1.88E00 | 6.48E-01 | 3.81E-02 | AKT1,ITGA5,ELF1,ITGA4                        |
| iCOS-iCOSL Signaling in T Helper Cells                     | 1.83E00 | 6.48E-01 | 3.7E-02  | SHC1,AKT1,PPP3CB,INPP5D                      |
| Natural Killer Cell Signaling                              | 1.81E00 | 6.48E-01 | 3.64E-02 | SHC1,AKT1,KLRC4-KLRK1/KLRK1,INPP5D           |
| GM-CSF Signaling                                           | 1.78E00 | 6.48E-01 | 4.84E-02 | SHC1,AKT1,PPP3CB                             |
| 4-hydroxyproline Degradation I                             | 1.76E00 | 6.48E-01 | 5E-01    | HOGA1                                        |
| Anandamide Degradation                                     | 1.76E00 | 6.48E-01 | 5E-01    | FAAH                                         |
| Macropinocytosis Signaling                                 | 1.67E00 | 5.8E-01  | 4.41E-02 | RAB5A,ITGA5,PDGFC                            |
| EIF2 Signaling                                             | 1.64E00 | 5.8E-01  | 2.7E-02  | SHC1,AKT1,RPS10,RPS15A,EIF2A                 |
| mTOR Signaling                                             | 1.61E00 | 5.8E-01  | 2.66E-02 | AKT1,RPS10,RPS15A,PDGFC,ARHGAP8/PRR5-ARHGAP8 |
| NF-κB Activation by Viruses                                | 1.59E00 | 5.8E-01  | 4.11E-02 | AKT1,ITGA5,ITGA4                             |
| Tyrosine Biosynthesis IV                                   | 1.59E00 | 5.8E-01  | 3.33E-01 | PCBD2                                        |

|                                                                 |         |          |          |                          |
|-----------------------------------------------------------------|---------|----------|----------|--------------------------|
| FLT3 Signaling in Hematopoietic Progenitor Cells                | 1.57E00 | 5.8E-01  | 4.05E-02 | SHC1,AKT1,INPP5D         |
| IL-4 Signaling                                                  | 1.55E00 | 5.69E-01 | 3.95E-02 | SHC1,AKT1,INPP5D         |
| PDGF Signaling                                                  | 1.53E00 | 5.69E-01 | 3.9E-02  | SHC1,PDGFC,INPP5D        |
| Reelin Signaling in Neurons                                     | 1.5E00  | 5.57E-01 | 3.8E-02  | AKT1,ITGA5,ITGA4         |
| Phenylalanine Degradation I (Aerobic)                           | 1.46E00 | 5.35E-01 | 2.5E-01  | PCBD2                    |
| FAK Signaling                                                   | 1.4E00  | 5E-01    | 3.45E-02 | AKT1,ITGA5,ITGA4         |
| CTLA4 Signaling in Cytotoxic T Lymphocytes                      | 1.38E00 | 5E-01    | 3.41E-02 | AKT1,AP1S2,CLTC          |
| G Beta Gamma Signaling                                          | 1.38E00 | 5E-01    | 3.41E-02 | SHC1,AKT1,GNG5           |
| Virus Entry via Endocytic Pathways                              | 1.37E00 | 5E-01    | 3.37E-02 | CLTC,ITGA5,ITGA4         |
| VEGF Signaling                                                  | 1.35E00 | 5E-01    | 3.3E-02  | SHC1,AKT1,PDGFC          |
| Fcy Receptor-mediated Phagocytosis in Macrophages and Monocytes | 1.32E00 | 5E-01    | 3.23E-02 | AKT1,FYB,INPP5D          |
| PPAR Signaling                                                  | 1.31E00 | 5E-01    | 3.19E-02 | SHC1,SRA1,PDGFC          |
| Tec Kinase Signaling                                            | 1.31E00 | 5E-01    | 2.53E-02 | GTF2I,ITGA5,GNG5,ITGA4   |
| Glioma Signaling                                                | 1.3E00  | 5E-01    | 3.16E-02 | SHC1,AKT1,PDGFC          |
| Huntington's Disease Signaling                                  | 1.3E00  | 5E-01    | 2.17E-02 | SHC1,AKT1,CLTC,GNG5,NAPB |

**GENE ONTOLOGY OF INTRACEREBRAL HEMORRHAGIC STROKE**

**Annotation Cluster 1** Enrichment Score: 2.0008035747785273

| Category      | Term                         | Count | %      | PValue   | Genes                                                                                                                                              | List Total | Pop Hits | Pop Total | Fold Enrichment | Benjamini | FDR  |
|---------------|------------------------------|-------|--------|----------|----------------------------------------------------------------------------------------------------------------------------------------------------|------------|----------|-----------|-----------------|-----------|------|
| GOTERM_BP_FAT | GO:0015031~protein transport | 19    | 10.053 | 6.74E-04 | RGPD6, SCAMP1, ARL6IP1, FYB, RGPD5, RGPD8, SCAMP2, RAB5C, CHMP5, NAPB, CLTC, AKT1, SFT2D2, AP1S2, TOMM6, ATG4C, LYST, FXC1, TOMM40L, RAB5A, PPP3CB | 138        | 762      | 13528     | 2.44            | 0.57      | 1.09 |

|               |                                                  |    |        |          |                                                                                                                                                    |     |     |       |      |      |       |
|---------------|--------------------------------------------------|----|--------|----------|----------------------------------------------------------------------------------------------------------------------------------------------------|-----|-----|-------|------|------|-------|
| GOTERM_BP_FAT | GO:0045184~establishment of protein localization | 19 | 10.053 | 7.50E-04 | RGPD6, SCAMP1, ARL6IP1, FYB, RGPD5, RGPD8, SCAMP2, RAB5C, CHMP5, NAPB, CLTC, AKT1, SFT2D2, AP1S2, TOMM6, ATG4C, LYST, FXC1, TOMM40L, RAB5A, PPP3CB | 138 | 769 | 13528 | 2.42 | 0.37 | 1.21  |
| GOTERM_BP_FAT | GO:0008104~protein localization                  | 19 | 10.053 | 3.43E-03 | RGPD6, SCAMP1, ARL6IP1, FYB, RGPD5, RGPD8, SCAMP2, RAB5C, CHMP5, NAPB, CLTC, AKT1, SFT2D2, AP1S2, TOMM6, ATG4C, LYST, FXC1, TOMM40L, RAB5A, PPP3CB | 138 | 882 | 13528 | 2.11 | 0.76 | 5.43  |
| GOTERM_BP_FAT | GO:0046907~intracellular transport               | 15 | 7.9365 | 6.75E-03 | RGPD6, ARL6IP1, FYB, SCAMP1, RGPD5, RGPD8, SCAMP2, KIF5B, CHMP5, NAPB, CLTC, AKT1, AP1S2, ATG4C, LYST, FXC1, PPP3CB                                | 138 | 657 | 13528 | 2.24 | 0.88 | 10.42 |
| GOTERM_BP_FAT | GO:0006886~intracellular protein transport       | 9  | 4.7619 | 3.64E-02 | FYB, ARL6IP1, AKT1, AP1S2, ATG4C, FXC1, PPP3CB, NAPB, CLTC                                                                                         | 138 | 374 | 13528 | 2.36 | 1.00 | 45.30 |
| GOTERM_BP_FAT | GO:0034613~cellular protein localization         | 9  | 4.7619 | 5.75E-02 | FYB, ARL6IP1, AKT1, AP1S2, ATG4C, FXC1, PPP3CB, NAPB, CLTC                                                                                         | 138 | 411 | 13528 | 2.15 | 1.00 | 61.82 |
| GOTERM_BP_FAT | GO:0070727~cellular macromolecule localization   | 9  | 4.7619 | 5.95E-02 | FYB, ARL6IP1, AKT1, AP1S2, ATG4C, FXC1, PPP3CB, NAPB, CLTC                                                                                         | 138 | 414 | 13528 | 2.13 | 1.00 | 63.10 |
| GOTERM_BP_FAT | GO:0006605~protein targeting                     | 6  | 3.1746 | 6.75E-02 | FYB, ARL6IP1, AKT1, ATG4C, FXC1, PPP3CB                                                                                                            | 138 | 215 | 13528 | 2.74 | 0.99 | 67.90 |

**Annotation Cluster 2**

**Enrichment Score: 1.946654262059368**

| Category      | Term                                                    | Count | %      | PValue   | Genes                                                                                                                                                                                                                                                                       | List Total | Pop Hits | Pop Total | Fold Enrichment | Benjamini | FDR   |
|---------------|---------------------------------------------------------|-------|--------|----------|-----------------------------------------------------------------------------------------------------------------------------------------------------------------------------------------------------------------------------------------------------------------------------|------------|----------|-----------|-----------------|-----------|-------|
| GOTERM_CC_FAT | GO:0015630~microtubule cytoskeleton                     | 16    | 8.4656 | 3.54E-04 | SDCCAG8, SEPT2, KIF5B, TTL5, DNHD1, CHEK1, DNAH1, WRN, AKT1, PBXIP1, CEP350, ATG4C, NAV1, LYST, FBXO5, CNTLN                                                                                                                                                                | 128        | 549      | 12782     | 2.91            | 0.09      | 0.46  |
| GOTERM_CC_FAT | GO:0005856~cytoskeleton                                 | 23    | 12.169 | 1.70E-02 | FYB, CTTNBP2NL, SDCCAG8, SEPT2, KIF5B, DIAPH1, UBR4, DNHD1, TTL5, DNAH1, CHEK1, WRN, ZNF174, AKT1, MAST2, PBXIP1, NAV1, CEP350, ATG4C, LYST, FAAH, FBXO5, CNTLN                                                                                                             | 128        | 1381     | 12782     | 1.66            | 0.58      | 20.05 |
| GOTERM_CC_FAT | GO:0043232~intracellular non-membrane-bounded organelle | 37    | 19.577 | 1.85E-02 | CTTNBP2NL, SDCCAG8, SEPT2, HMG2, DIAPH1, RPS15A, TTL5, DNAH1, CHEK1, ZNF174, AKT1, DCAF13, PBXIP1, DGCR8, FBXO5, CNTLN, ZWILCH, FYB, EXOSC9, KIF5B, UBR4, SYCE2, DNHD1, WRN, EXOSC1, ATRX, PAPOLA, MAST2, NAV1, APITD1, CEP350, ATG4C, LYST, FAAH, TEP1, RPS10, CORT, TBX19 | 128        | 2596     | 12782     | 1.42            | 0.54      | 21.53 |
| GOTERM_CC_FAT | GO:0043228~non-membrane-bounded organelle               | 37    | 19.577 | 1.85E-02 | CTTNBP2NL, SDCCAG8, SEPT2, HMG2, DIAPH1, RPS15A, TTL5, DNAH1, CHEK1, ZNF174, AKT1, DCAF13, PBXIP1, DGCR8, FBXO5, CNTLN, ZWILCH, FYB, EXOSC9, KIF5B, UBR4, SYCE2, DNHD1, WRN, EXOSC1, ATRX, PAPOLA, MAST2, NAV1, APITD1, CEP350, ATG4C, LYST, FAAH, TEP1, RPS10, CORT, TBX19 | 128        | 2596     | 12782     | 1.42            | 0.54      | 21.53 |
| GOTERM_CC_FAT | GO:0044430~cytoskeletal part                            | 15    | 7.9365 | 9.00E-02 | SDCCAG8, SEPT2, KIF5B, TTL5, DNHD1, CHEK1, DNAH1, WRN, AKT1, PBXIP1, CEP350, ATG4C, NAV1, FBXO5, CNTLN                                                                                                                                                                      | 128        | 952      | 12782     | 1.57            | 0.68      | 70.68 |

**Annotation Cluster 3**

**Enrichment Score: 1.4567585294932377**

| Category      | Term                                             | Count | %      | PValue | Genes                                     | List Total | Pop Hits | Pop Total | Fold Enrichment | Benjamini | FDR   |
|---------------|--------------------------------------------------|-------|--------|--------|-------------------------------------------|------------|----------|-----------|-----------------|-----------|-------|
| GOTERM_CC_FAT | GO:0030136~clathrin-coated vesicle               | 6     | 3.1746 | 0.01   | SCAMP1, ATP7A, AP1S2, PI4K2A, RAB5A, CLTC | 128        | 132      | 12782     | 4.54            | 0.58      | 12.44 |
| GOTERM_CC_FAT | GO:0030665~clathrin coated vesicle membrane      | 4     | 2.1164 | 0.02   | SCAMP1, AP1S2, PI4K2A, CLTC               | 128        | 53       | 12782     | 7.54            | 0.63      | 18.55 |
| GOTERM_BP_FAT | GO:0006892~post-Golgi vesicle-mediated transport | 4     | 2.1164 | 0.02   | SCAMP1, AP1S2, SCAMP2, CLTC               | 138        | 58       | 13528     | 6.76            | 0.99      | 29.07 |
| GOTERM_CC_FAT | GO:0030135~coated vesicle                        | 6     | 3.1746 | 0.02   | SCAMP1, ATP7A, AP1S2, PI4K2A, RAB5A, CLTC | 128        | 159      | 12782     | 3.77            | 0.54      | 24.29 |

|               |                                                  |    |        |      |                                                                                                                  |     |     |       |       |      |       |
|---------------|--------------------------------------------------|----|--------|------|------------------------------------------------------------------------------------------------------------------|-----|-----|-------|-------|------|-------|
| GOTERM_CC_FAT | GO:0030140~trans-Golgi network transport vesicle | 3  | 1.5873 | 0.02 | ATP7A, AP1S2, CLTC                                                                                               | 128 | 24  | 12782 | 12.48 | 0.49 | 26.56 |
| GOTERM_CC_FAT | GO:0030133~transport vesicle                     | 4  | 2.1164 | 0.03 | ATP7A, AP1S2, PI4K2A, CLTC                                                                                       | 128 | 66  | 12782 | 6.05  | 0.51 | 30.76 |
| GOTERM_CC_FAT | GO:0030662~coated vesicle membrane               | 4  | 2.1164 | 0.04 | SCAMP1, AP1S2, PI4K2A, CLTC                                                                                      | 128 | 73  | 12782 | 5.47  | 0.54 | 37.96 |
| GOTERM_CC_FAT | GO:0005768~endosome                              | 8  | 4.2328 | 0.04 | SCAMP1, ATP7A, SCAMP2, RAB5C, CHMP5, PI4K2A, RAB5A, CYBASC3                                                      | 128 | 315 | 12782 | 2.54  | 0.53 | 39.32 |
| GOTERM_CC_FAT | GO:0030659~cytoplasmic vesicle membrane          | 5  | 2.6455 | 0.05 | SCAMP1, AP1S2, PI4K2A, RAB5A, CLTC                                                                               | 128 | 139 | 12782 | 3.59  | 0.60 | 48.53 |
| GOTERM_CC_FAT | GO:0012506~vesicle membrane                      | 5  | 2.6455 | 0.06 | SCAMP1, AP1S2, PI4K2A, RAB5A, CLTC                                                                               | 128 | 151 | 12782 | 3.31  | 0.65 | 57.50 |
| GOTERM_CC_FAT | GO:0044431~Golgi apparatus part                  | 7  | 3.7037 | 0.07 | SCAMP1, ATP7A, AP1S2, SCAMP2, PDGFC, CLIP3, CLTC                                                                 | 128 | 294 | 12782 | 2.38  | 0.68 | 62.65 |
| GOTERM_CC_FAT | GO:0012505~endomembrane system                   | 13 | 6.8783 | 0.09 | ARL6IP1, SCAMP1, RGPDP6, RGPDP5, RGPDP8, SCAMP2, CLTC, AP1S2, STT3A, INSIG2, SERINC1, PI4K2A, RAB5A, PDGFC, ASPH | 128 | 782 | 12782 | 1.66  | 0.69 | 69.95 |
| GOTERM_CC_FAT | GO:0005798~Golgi-associated vesicle              | 3  | 1.5873 | 0.09 | ATP7A, AP1S2, CLTC                                                                                               | 128 | 51  | 12782 | 5.87  | 0.67 | 71.19 |

**Annotation Cluster 4** Enrichment Score: 1.2483614903873126

| Category      | Term                                        | Count | %      | PValue | Genes                      | List Total | Pop Hits | Pop Total | Fold Enrichment | Benjamini | FDR   |
|---------------|---------------------------------------------|-------|--------|--------|----------------------------|------------|----------|-----------|-----------------|-----------|-------|
| GOTERM_BP_FAT | GO:0006665~sphingolipid metabolic process   | 4     | 2.1164 | 0.04   | GBA2, SERINC1, LASS2, GALC | 138        | 75       | 13528     | 5.23            | 1.00      | 48.90 |
| GOTERM_BP_FAT | GO:0006643~membrane lipid metabolic process | 4     | 2.1164 | 0.05   | GBA2, SERINC1, LASS2, GALC | 138        | 81       | 13528     | 4.84            | 1.00      | 55.78 |
| GOTERM_BP_FAT | GO:0006672~ceramide metabolic process       | 3     | 1.5873 | 0.07   | GBA2, LASS2, GALC          | 138        | 42       | 13528     | 7.00            | 1.00      | 67.83 |
| GOTERM_BP_FAT | GO:0046519~sphingoid metabolic process      | 3     | 1.5873 | 0.08   | GBA2, LASS2, GALC          | 138        | 45       | 13528     | 6.54            | 1.00      | 72.33 |

**Annotation Cluster 5** Enrichment Score: 1.1612816039563372

| Category      | Term                                        | Count | %      | PValue | Genes                                         | List Total | Pop Hits | Pop Total | Fold Enrichment | Benjamini | FDR   |
|---------------|---------------------------------------------|-------|--------|--------|-----------------------------------------------|------------|----------|-----------|-----------------|-----------|-------|
| GOTERM_CC_FAT | GO:0042470~melanosome                       | 4     | 2.1164 | 0.06   | RAB5C, RAB5A, CLTC, PRDX1                     | 128        | 89       | 12782     | 4.49            | 0.64      | 54.53 |
| GOTERM_CC_FAT | GO:0048770~pigment granule                  | 4     | 2.1164 | 0.06   | RAB5C, RAB5A, CLTC, PRDX1                     | 128        | 89       | 12782     | 4.49            | 0.64      | 54.53 |
| GOTERM_CC_FAT | GO:0009898~internal side of plasma membrane | 7     | 3.7037 | 0.10   | AP1S2, MTMR1, MAST2, RAB5C, RAB5A, CLTC, GNG5 | 128        | 316      | 12782     | 2.21            | 0.67      | 72.75 |

**Control Subjects**

**SIGNIFICANTLY ENRICHED CANONICAL PATHWAYS OF CONTROL SUBJECTS**

| Inguenuity Canonical Pathways           | -log(p-value) | -log(B-H p-value) | Ratio    | Molecules    |
|-----------------------------------------|---------------|-------------------|----------|--------------|
| Antigen Presentation Pathway            | 3.35E00       | 1.71E00           | 5.41E-02 | HLA-DOB,TAP2 |
| Bile Acid Biosynthesis, Neutral Pathway | 1.96E00       | 8.31E-01          | 7.69E-02 | SCP2         |

|                                                      |         |          |          |         |
|------------------------------------------------------|---------|----------|----------|---------|
| Methionine Degradation I (to Homocysteine)           | 1.87E00 | 8.31E-01 | 6.25E-02 | AHCY    |
| Cysteine Biosynthesis III (mammalia)                 | 1.82E00 | 8.31E-01 | 5.56E-02 | AHCY    |
| Superpathway of Methionine Degradation               | 1.58E00 | 8.31E-01 | 3.23E-02 | AHCY    |
| B Cell Development                                   | 1.54E00 | 8.31E-01 | 2.94E-02 | HLA-DOB |
| tRNA Charging                                        | 1.48E00 | 8.31E-01 | 2.56E-02 | IARS    |
| Graft-versus-Host Disease Signaling                  | 1.4E00  | 8.31E-01 | 2.08E-02 | HLA-DOB |
| Autoimmune Thyroid Disease Signaling                 | 1.39E00 | 8.31E-01 | 2.04E-02 | HLA-DOB |
| Primary Immunodeficiency Signaling                   | 1.36E00 | 8.31E-01 | 1.92E-02 | TAP2    |
| Nur77 Signaling in T Lymphocytes                     | 1.32E00 | 8.31E-01 | 1.75E-02 | HLA-DOB |
| Regulation of Cellular Mechanics by Calpain Protease | 1.32E00 | 8.31E-01 | 1.75E-02 | ACTN4   |

**GENE ONTOLOGY OF CONTROL SUBJECTS**

**Annotation Cluster 1**

**Enrichment Score: 1.556431804209894**

| Category      | Term                                  | Count | %      | PValue | Genes                               | List Total | Pop Hits | Pop Total | Fold Enrichment | Benjamini | FDR   |
|---------------|---------------------------------------|-------|--------|--------|-------------------------------------|------------|----------|-----------|-----------------|-----------|-------|
| GOTERM_CC_FAT | GO:0044432~endoplasmic reticulum part | 4     | 21.053 | 0.00   | TAP2, FOXRED2, HLA-DOB, PORCN       | 14         | 347      | 12782     | 10.52           | 0.30      | 4.79  |
| GOTERM_MF_FAT | GO:0001882~nucleoside binding         | 5     | 26.316 | 0.07   | IARS, ACTN4, TAP2, FOXRED2, HLA-DOB | 14         | 1612     | 12983     | 2.88            | 1.00      | 52.67 |
| GOTERM_CC_FAT | GO:0005783~endoplasmic reticulum      | 4     | 21.053 | 0.07   | TAP2, FOXRED2, HLA-DOB, PORCN       | 14         | 960      | 12782     | 3.80            | 0.94      | 52.80 |
