# Supplementary material for: Intracerebral Hemorrhage and Ischemic Stroke of Different Etiologies Have Distinct Alternatively Spliced mRNA Profiles in the Blood: a Pilot RNA-seq Study
Source: Transl Stroke Res. 2015 May 22;6(4):284–9. doi: 10.1007/s12975-015-0407-9 (PMC4485700; doi:10.1007/s12975-015-0407-9)
Supplement: Supplementary file 5 — Over all details of the RNA sequencing reads and quality. (PDF 36 kb) [file 12975_2015_407_MOESM1_ESM.pdf]

Supplementary Table 1. Details of RNA-sequencing reads and quality

| All Samples                          |                         |
|--------------------------------------|-------------------------|
| Sequence Length                      | 100                     |
| Average Quality per Read PHRED score | 37                      |
| Total Sequence Reads Mean $\pm$ SD   | 1.95E+08 $\pm$ 1.30E+07 |
| Total Alignments Mean $\pm$ SD       | 1.61E+08 $\pm$ 1.01E+07 |
| %GC Alignments Mean $\pm$ SD         | 54.20 $\pm$ 1.91        |
| Unmapped Sequences Mean $\pm$ SD     | 3.33E+07 $\pm$ 4.44E+06 |
| %GC Unmapped Sequences Mean $\pm$ SD | 61.60 $\pm$ 3.45        |

| Total Sequence Reads                  | Ischemic Stroke         |                         |                         | Intracerebral Hemorrhage | Controls                |
|---------------------------------------|-------------------------|-------------------------|-------------------------|--------------------------|-------------------------|
|                                       | Cardioembolic           | Large Vessel            | Lacunar                 |                          |                         |
| Mean $\pm$ SD                         | 1.93E+08 $\pm$ 1.07E+07 | 1.99E+08 $\pm$ 1.14E+07 | 1.99E+08 $\pm$ 1.18E+07 | 1.91E+08 $\pm$ 1.53E+08  | 1.92E+08 $\pm$ 1.94E+09 |
| <b>Total Sequence Reads by Sample</b> |                         |                         |                         |                          |                         |
| 1                                     | 177,117,828             | 203,837,628             | 203,564,103             | 191,131,791              | 185,714,780             |
| 2                                     | 195,150,937             | 182,750,587             | 213,336,146             | 199,832,252              | 218,687,770             |
| 3                                     | 198,658,650             | 209,078,152             | 188,188,692             | 169,147,880              | 172,555,000             |
| 4                                     | 200,504,201             | 198,375,293             | 190,420,476             | 202,961,105              | 192,521,761             |

| Number of Alignments        | Ischemic Stroke         |                         |                         | Intracerebral Hemorrhage | Controls                |
|-----------------------------|-------------------------|-------------------------|-------------------------|--------------------------|-------------------------|
|                             | Cardioembolic           | Large Vessel            | Lacunar                 |                          |                         |
| Mean $\pm$ SD               | 1.60E+08 $\pm$ 9.73E+06 | 1.65E+08 $\pm$ 1.25E+07 | 1.64E+08 $\pm$ 8.34E+06 | 1.59E+08 $\pm$ 1.18E+07  | 1.59E+08 $\pm$ 1.18E+07 |
| CV (%)                      | 6.073                   | 7.61352                 | 5.09486                 | 7.42897                  | 7.46071                 |
| Mean %GC $\pm$ SD           | 54.75 $\pm$ 2.36        | 55.75 $\pm$ 0.96        | 53.75 $\pm$ 1.89        | 52.00 $\pm$ 0.82         | 54.75 $\pm$ 1.26        |
| <b>Alignments by Sample</b> |                         |                         |                         |                          |                         |
| 1                           | 164,675,690             | 171,375,517             | 166,034,796             | 160,755,434              | 157,275,379             |
| 2                           | 164,012,069             | 146,190,367             | 174,444,217             | 168,409,440              | 174,121,248             |
| 3                           | 145,627,854             | 172,988,643             | 157,269,390             | 142,396,412              | 145,330,668             |
| 4                           | 166,272,000             | 168,785,456             | 156,892,385             | 166,405,048              | 157,539,078             |

| Number of Unmapped Sequences        | Ischemic Stroke         |                         |                         | Intracerebral Hemorrhage | Controls                |
|-------------------------------------|-------------------------|-------------------------|-------------------------|--------------------------|-------------------------|
|                                     | Cardioembolic           | Large Vessel            | Lacunar                 |                          |                         |
| Mean $\pm$ SD                       | 3.27E+07 $\pm$ 3.14E+06 | 3.37E+07 $\pm$ 3.28E+06 | 3.52E+07 $\pm$ 3.66E+06 | 3.13E+07 $\pm$ 4.05E+06  | 3.38E+07 $\pm$ 7.94E+06 |
| Mean %GC $\pm$ SD                   | 63.25 $\pm$ 2.63        | 62.25 $\pm$ 1.26        | 61.75 $\pm$ 1.89        | 57.25 $\pm$ 4.86         | 63.5 $\pm$ 2.38         |
| <b>Unmapped Sequences by Sample</b> |                         |                         |                         |                          |                         |
| 1                                   | 35,828,511              | 32,462,111              | 37,529,307              | 30,376,357               | 28,439,401              |
| 2                                   | 34,646,581              | 36,560,220              | 38,891,929              | 31,422,812               | 44,566,522              |
| 3                                   | 31,489,974              | 36,089,509              | 30,919,302              | 26,751,468               | 27,224,332              |
| 4                                   | 28,878,937              | 29,589,837              | 33,528,091              | 36,556,057               | 34,982,683              |
